# Supplementary material for: Defining the chromatin-associated protein landscapes on Trypanosoma brucei repetitive elements using synthetic TALE proteins
Source: eLife. 2026 Mar 10;14:RP109950. doi: 10.7554/eLife.109950 (PMC12975129; doi:10.7554/eLife.109950)
Supplement: Supplementary file 1. — (a) Affinity selection data for wild-type cells expressing No YFP versus cells expressing YFP-TRF (WT NoYFP vs. YFP-TRF). Proteins enriched in YFP-TRF affinity selections were identified and quantified by LC-MS/MS analysis relative to affinity selections from wild-type cells lacking any YFP as a negative control. (b) Affinity selection data for wild-type cells expressing No YFP versus cells expressing TelR-TALE (WT NoYFP vs. TelR-TALE). Proteins enriched in TelR-TALE affinity selections were identified and quantified by LC-MS/MS analysis relative to affinity selections from wild-type cells lacking any YFP as a negative control. (c) Affinity selection data for wild-type cells expressing No YFP versus cells expressing NonR-TALE (WT NoYFP vs. NonR-TALE). Proteins enriched in NonR-TALE affinity selections were identified and quantified by LC-MS/MS analysis relative to affinity selections from wild-type cells lacking any YFP as a negative control. (d) Affinity selection data for cells expressing NonR-TALE versus cells expressing TelR-TALE (NonR-TALE vs. TelR-TALE). Proteins enriched in TelR-TALE affinity selections were identified and quantified by LC-MS/MS analysis relative to affinity selections of NonR-TALE. (e) Affinity selection data for wild-type cells expressing No YFP versus cells expressing 147R-TALE (WT NoYFP vs. 147R-TALE). Proteins enriched in 147R-TALE affinity selections were identified and quantified by LC-MS/MS analysis relative to affinity selections from wild-type cells lacking any YFP as a negative control. (f) Affinity selection data for cells expressing NonR-TALE versus cells expressing 147R-TALE (NonR-TALE vs. TelR-TALE). Proteins enriched in 147R-TALE affinity selections were identified and quantified by LC-MS/MS analysis relative to affinity selections of NonR-TALE. (g) Affinity selection data for wild-type cells expressing No YFP versus cells expressing ingiR-TALE (WT NoYFP vs. ingiR-TALE). Proteins enriched in ingiR-TALE affinity selections were [file elife-109950-supp1.xlsx]

## Sheet: SuppFile1a_WTNoYFPvYFP-TRF
UniProt ID	TriTryp ID	NAME	DESCRIPTION	-Log Student's T-test p-value WT_TRF	Previous ID(s)
Q388W1	Tb927.10.12850	TRF	ttaggg binding factor	7.06395	Previous IDs: Tb10.389.0680
Q585J5	Tb427.04.3550;Tb427.05.1610		60S ribosomal protein L13a, putative	6.29249	Previous IDs: Tb427tmp.26G5.360;Tb427tmp.30H13.890;current=false
Q586J9	Tb927.2.2190	HDAC3	histone deacetylase 3	5.9928
Q383U2	Tb927.11.9870	TelAP1	Telomere-associated protein 1	5.71661	Previous IDs: Tb11.01.1630;Tb11.01.1630:mRNA;Tb11.01.1630:pep
Q387L4;C1JEX5	TB927.11.370	RAP1	repressor activator protein 1 (RAP1)	5.44727
Q57XY9	Tb927.3.1560	TIF2	TRF-Interacting Factor 2	5.41733	Previous IDs: Tb03.1J15.80
Q382D5;Q382D7	Tb11.01.5590	NRBD2	nuclear RNA binding domain 2	5.40189
Q38DU2	Tb09.211.2150		Polyadenylate-binding protein	5.11543
Q38FD7;Q38FE2	Tb09.v1.0150		hypothetical protein, conserved	4.80735
Q38BZ3	Tb927.10.2520	ppl2	PrimPol-like protein 2	4.53327	Previous IDs: TRYP_x-70a06.p2kb545_702;Tb10.70.5160
Q384L0	Tb927.11.8090		protein phosphatase 1, putative	4.30979	Previous IDs: Tb11.01.0450;Tb11.01.0450:mRNA;Tb11.01.0450:pep
Q586Z9	Tb927.6.4330	TelAP2	telomere-associated protein	4.20916
Q586Q9;B7X5Y5	Tb927.2.4580		Uncharacterized protein	4.19155
Q38CD0;Q587D5	Tb10.70.7010		60S ribosomal protein L9, putative	4.07788
Q385L3	Tb11.02.3250	POLQ	DNA polymerase theta	4.02762
Q38FS5	Tb927.9.2420		hypothetical protein, conserved	3.99068	Previous IDs: Tb09.160.1120;Tb09.160.1120:mRNA;Tb09.160.1120:pep;chr9contig160.tmp0112c
Q583K7	Tb427.04.1860		ribosomal protein S19, putative	3.92075	Previous IDs: Tb427tmp.29M18.160;current=false
Q383K0;Q383I8	Tb11.01.2560		40S ribosomal protein SA	3.82601
Q586I4;P51408	Tb927.6.5120		60S acidic ribosomal protein P2, putative	3.76966
Q38BK6;Q38BK7	Tb10.70.3360		40S ribosomal protein S3a	3.75077
Q38FD9;Q38FE4	Tb927.9.3990		ribosomal protein S7, putative	3.7459	Previous IDs: Tb09.160.2550;Tb09.160.2550:mRNA;Tb09.160.2550:pep;chr9contig160.tmp0216
Q382C4	Tb927.10.3840;Tb927.11.14130		60S ribosomal protein L18a, putative;ribosomal protein L18, putative	3.57831	Previous IDs: TRYP_x-70a06.p2kb545_470;Tb11.01.5720;Tb10.70.3510;Tb11.01.5720:mRNA;Tb11.01.5720:pep
Q580D8;Q4FKD4	Tb927.4.1100		Ribosomal protein L21E (60S), putative	3.55524
Q380Z5	Tb927.11.16920	VEX1	VSG exclusion protein 1 (VEX1)	3.48752
Q381J6	Tb927.11.15880;Tb927.11.15900		60S ribosomal protein L27, putative	3.47199	Previous IDs: Tb11.01.7535;Tb11.01.7545;Tb11.01.7535:mRNA;Tb11.01.7535:pep;Tb11.01.7545:mRNA;Tb11.01.7545:pep
Q71SQ4;Q38EX8	TXNPx		Tryparedoxin peroxidase	3.43813
Q4GYE7	Tb927.1.4310	FAZ2	Flagellum attachment zone protein 2	3.42304
Q57VV0	Tb927.7.1040		40S ribosomal protein S16	3.42088
Q386A6	Tb11.02.1566		Variant surface glycoprotein (VSG)-related, putative	3.36256
P50098			Inosine-5'-monophosphate dehydrogenase	3.33119
Q38B01	Tb927.10.6050	CHC	clathrin heavy chain	3.30155	Previous IDs: TRYP_x-70a06.p2kb545_120;Tb10.70.0830;embl.373
Q383V8	Tb927.10.13500;Tb927.11.9710	RPL10A	60S ribosomal protein L10a;60S ribosomal protein L10a, putative	3.25863	Previous IDs: Tb10.05.0220;Tb11.01.1470;Tb11.01.1470:mRNA;Tb11.01.1470:pep
Q38CX3	Tb09.244.2630		40S ribosomal protein S6	3.25504
Q385E2	Tb927.11.6270	PIP5Pase1	inositol-1,4,5-trisphosphate (IP3) 5-phosphatase, putative	3.20775	Previous IDs: Tb11.02.4140;Tb11.02.4140:mRNA;Tb11.02.4140:pep
Q388W4	Tb927.10.12820		hypothetical protein, conserved	3.18979	Previous IDs: Tb10.389.0720
Q57ZN9	Tb927.5.1700	RPA2	replication Factor A 28 kDa subunit, putative	3.15246	Previous IDs: Tb05.1P6.900
Q583S0	Tb927.6.2640	KAP60	importin alpha subunit, putative	3.12694	Previous IDs: Tb06.5F5.40
Q389I7;Q38EW1	Tb927.10.11540;Tb927.9.6070	RPS3	40S ribosomal protein S3, putative	3.08456	Previous IDs: Tb09.160.4450;Tb10.26.0370;Tb09.160.4450:mRNA;Tb09.160.4450:pep;chr9contig160.tmp0331
Q389P1	Tb11.v5.0543;Tb927.10.10890;Tb927.10.10900;Tb927.10.10920;Tb927.10.10940;Tb927.10.10950;Tb927.10.10960		Heat shock protein 83, putative;heat shock protein, putative	3.07417	Previous IDs: Tb10.329.0050;Tb10.329.0060;Tb10.329.0080;Tb10.329.0100;Tb10.329.0110;Tb10.329.0120
P86939;P86934;P86933	Tb10.70.5670		Elongation factor 1-alpha 2	3.0664
Q38DP2	Tb09.211.2630		60S ribosomal protein L23, putative	3.05104
Q38EC5	Tb927.9.8070;Tb927.9.8420	QM	QM-like protein, 60S ribosomal protein L10, putative	3.04105	Previous IDs: Tb09.211.0110;Tb09.211.0340;Tb09.211.0110:mRNA;Tb09.211.0110:pep;Tb09.211.0340:mRNA;Tb09.211.0340:pep;chr9contig211.tmp0011c;chr9contig211.tmp0042c
Q57WH0	Tb927.7.3550	WCB	cytoskeleton associated protein, putative	3.0344	Previous IDs: Tb07.28B13.500
Q57XK6	Tb927.3.3560		U-box domain containing protein, putative	3.03079	Previous IDs: Tb03.25B21.20
Q388B3	Tb927.10.14930	ZC3H39	Zinc finger CCCH domain-containing protein 39	2.91709	Previous IDs: TRYP_x-61h03.q2kb185_255;Tb10.61.1690
Q386V3	Tb927.11.2050;Tb927.11.2060		60S acidic ribosomal protein P0, putative	2.91639	Previous IDs: Tb11.46.0001;Tb11.46.0002;Tb11.46.0001:mRNA;Tb11.46.0001:pep;Tb11.46.0002:mRNA;Tb11.46.0002:pep
D6XKT6	Tb927.8.1990	mPRX	peroxidoxin	2.90032	Previous IDs: Tb08.26N11.460
Q389K1	Tb927.10.11390		60S ribosomal protein L6, putative	2.89856	Previous IDs: Tb10.26.0560
Q57WJ7;Q57XZ9	Tb927.8.8330		Calpain, putative	2.88896
Q581Q1;Q581Q2	Tb927.4.1800		Ribosomal protein L3, mitochondrial, putative	2.88835
Q586H7	Tb927.6.5050		V-type ATPase, C subunit, putative	2.8617	Previous IDs: Tb06.30P15.380
Q57YA3	Tb427.07.2820;Tb427.07.2830;Tb427.07.2840;Tb427.07.2850;Tb427.07.2860;Tb427.07.2870;Tb427.07.2880;Tb427.07.2890;Tb427.07.2900;Tb427.07.2910;Tb427.07.2920;Tb427.07.2930;Tb427.07.2940		histone H2A, putative	2.82533	Previous IDs: Tb427tmp.13M20.510;Tb427tmp.13M20.520;Tb427tmp.13M20.530;Tb427tmp.13M20.540;Tb427tmp.13M20.550;Tb427tmp.13M20.560;Tb427tmp.13M20.570;Tb427tmp.13M20.580;Tb427tmp.13M20.590;Tb427tmp.13M20.600;Tb427tmp.13M20.610;Tb427tmp.13M20.620;Tb427tmp.13M20.630;current=false
Q582N2;P49669	Tb927.3.5050		60S ribosomal protein L4	2.82058
Q388D3	Tb927.10.14600;Tb927.10.14710	RPS2	40S ribosomal protein S2, putative	2.77921	Previous IDs: TRYP_x-61h03.q2kb185_295;TRYP_x-61h03.q2kb185_310;Tb10.61.1960;Tb10.61.2070
Q585G9	Tb927.2.1080	RHS5	retrotransposon hot spot protein 5 (RHS5), putative	2.75443
Q57Z31	Tb927.5.4170		Histone H4	2.75401
Q383E9;P20030	Tb11.01.3080		Heat shock protein 70, putative	2.7267
Q385D9	Tb927.11.6300		40S ribosomal protein S5, putative	2.68958	Previous IDs: Tb11.02.4170;Tb11.02.4170:mRNA;Tb11.02.4170:pep
Q38B69	Tb10.70.1730		40S ribosomal protein S18, putative	2.6826
Q4GYQ5	TB927.1.3180		40S ribosomal protein S11, putative	2.63548
Q38FS0	Tb09.160.1160		Uncharacterized protein	2.63447
Q584N8	Tb927.2.100	RHS1	retrotransposon hot spot protein 1 (RHS1), putative	2.58215
Q382Z8	Tb927.11.11820;Tb927.11.11830		40S ribosomal protein S17, putative	2.56962	Previous IDs: 237.t00946;237.t00947;Tb11.01.3675;Tb11.01.3675:mRNA;Tb11.01.3675:pep;Tb11.01.3676;Tb11.01.3676:mRNA;Tb11.01.3676:pep
Q867G5;Q387X7	Tb927.10.15350	H3V	histone H3 variant V	2.54499	Previous IDs: TRYP_x-61h03.q2kb185_167;Tb10.61.1090
Q38EI9	Tb927.9.7590;Tb927.9.7620	L11	60S ribosomal protein L11, putative	2.53214	Previous IDs: Tb09.160.5580;Tb09.160.5590;Tb09.160.5580:mRNA;Tb09.160.5580:pep;Tb09.160.5590:mRNA;Tb09.160.5590:pep;chr9contig160.tmp0444c;chr9contig160.tmp0445c
Q583T1;Q383F5;P55842	Tb927.6.720		40S ribosomal protein L14, putative	2.51282
Q38AC1	Tb927.10.8430		40S ribosomal protein S12, putative	2.48068	Previous IDs: TRYPtp6k15-3d06.p1c_305;Tb10.6k15.2050
Q57V37;Q57V35	Tb927.7.1730		60S ribosomal protein L7, putative	2.46182
Q388B1	Tb927.10.14950	ZC3H40	Zinc finger CCCH domain-containing protein 40	2.46017	Previous IDs: TRYP_x-61h03.q2kb185_245;Tb10.61.1630
Q584F9	Tb927.4.2280		hypothetical protein, conserved	2.44949	Previous IDs: Tb04.1H19.550
O15648;D6XDN4	Tb427.03.3270	PFK	ATP-dependent 6-phosphofructokinase, glycosomal	2.43116	Previous IDs: Tb03.3K10.320
Q583I5	Tb927.4.2080	CC2D	Coiled-coil and C2 domain-containing protein	2.42944	Previous IDs: Tb04.29M18.770
Q57VM1	Tb427.08.1330;Tb427.08.1340		60S ribosomal protein L7a, putative	2.41772	Previous IDs: Tb427tmp.29O4.580;Tb427tmp.29O4.590;current=false
Q380Y7;E7BBN6	Tb11.01.8770		Uncharacterized protein	2.41566
Q38BK1	Tb927.10.3990	DHH1	DHH1	2.40872	Previous IDs: TRYP_x-70a06.p2kb545_441;Tb10.70.3290
Q57V54;Q57V55	Tb927.3.3320		60S ribosomal protein L13	2.40079
Q57V56	Tb927.3.3300		Uncharacterized protein	2.38388
Q57WE8	Tb927.7.3330	FAZ10	Flagellar attachment zone protein 10	2.37421	Previous IDs: Tb07.28B13.760
Q8IFI8	Tb927.1.120	RHS4	retrotransposon hot spot protein 4 (RHS4), putative	2.35096
Q388X5;Q383V6	Tb927.10.12680		60S ribosomal protein L34, putative	2.34939	Previous IDs: Tb10.389.0910
Q388D4	Tb927.10.14700		hypothetical protein, conserved	2.32276	Previous IDs: TRYP_x-61h03.q2kb185_296;Tb10.61.1970
Q38EY6	Tb927.9.5690		60S acidic ribosomal protein, putative	2.29436	Previous IDs: Tb09.160.4200;Tb09.160.4200:mRNA;Tb09.160.4200:pep;chr9contig160.tmp0317
Q38BI9;P49153;Q38BI8	Tb10.70.3170		60S ribosomal protein L30	2.28814
D6XFL0	Tb927.4.2740		p25-alpha, putative	2.27708	Previous IDs: Tb04.2H8.1370
Q57WF2	Tb927.7.3370	IFT74	Intraflagellar transport protein 74, putative	2.27594	Previous IDs: Tb07.28B13.700
Q57VP3;P17959	Tb427.10.5610	NA	40S ribosomal protein S9, putative	2.24686	Previous IDs: TRYP_x-70a06.p2kb545_190;current=false;Tb427.10.1380;current=false;embl.241;current=false
Q388B7;REV__CON__Q497I4	Tb11.v5.0636;Tb927.10.14890	KIFC1	C-terminal motor kinesin, putative	2.22341	Previous IDs: Tb10.61.1750;embl.126
Q385T6	Tb927.10.14580;Tb927.11.4820		60S ribosomal protein L17, putative	2.15378	Previous IDs: TRYP_x-61h03.q2kb185_314;Tb11.02.2430;Tb10.61.2090;Tb11.02.2430:mRNA;Tb11.02.2430:pep
Q586P6	Tb927.2.4410		Golgi apparatus membrane protein TVP23 homolog	2.14602
Q57YL6	Tb427.08.6150;Tb427.08.6160		40S ribosomal protein S8, putative	2.13496	Previous IDs: Tb427tmp.11J15.560;Tb427tmp.11J15.570;current=false
Q586C2	Tb927.10.15120;Tb927.2.5910		40S ribosomal protein S13, putative	2.12762	Previous IDs: TRYP_x-61h03.q2kb185_209;Tb10.61.1390
Q57WF9	Tb927.7.3440	CAP27	Cytoskeleton-associated protein 27 kDa	2.07544	Previous IDs: Tb07.28B13.630
Q382Y3	Tb927.11.11965;Tb927.11.11975;Tb927.11.11980	CAP15	cytoskeleton-associated protein 15;cytoskeleton-associated protein, putative	2.07222	Previous IDs: NCDS.Tb927.11.11965;NTCDS.Tb11.NT.142;Tb11.01.3805;Tb11.01.3805:mRNA;Tb11.01.3805:pep
Q38C20	Tb927.10.2240		RNA binding protein	2.04204	Previous IDs: TRYP_x-70a06.p2kb545_749;Tb10.70.5500
Q38A80	Tb927.10.8940	KH1	flagellum targeting protein kharon1, putative	2.0232	Previous IDs: TRYPtp6k15-3d06.p1c_221;Tb10.6k15.1500
Q389T1;Q389S5;Q389S0	Tb927.10.10460;Tb927.10.10470;Tb927.10.10480;Tb927.10.10490;Tb927.10.10500;Tb927.10.10510;Tb927.10.10515;Tb927.10.10520;Tb927.10.10530;Tb927.10.10540;Tb927.10.10550;Tb927.10.10560;Tb927.10.10570;Tb927.10.10580;Tb927.10.10590	H2B	histone H2B, putative;unspecified product	2.01251	Previous IDs: Tb10.406.0330;Tb10.406.0340;Tb10.406.0350;Tb10.406.0360;Tb10.406.0370;Tb10.406.0380;Tb10.406.0390;Tb10.406.0400;Tb10.406.0410;Tb10.406.0420;Tb10.406.0430;Tb10.406.0440;Tb10.406.0450;Tb10.406.0460
Q57ZF2	Tb927.3.1590	MRB1590	mitochondrial RNA binding complex 1 subunit	2.01062	Previous IDs: Tb03.30P12.70
Q38AM2	Tb10.6k15.3250		Succinate--CoA ligase [ADP-forming] subunit beta, mitochondrial	1.96505
Q57XQ0	Tb927.7.2240		Uncharacterized protein	1.94637
Q387T8	Tb927.10.15760	CAP36	Cytoskeleton-associated protein 36 kDa	1.92186	Previous IDs: TRYP_x-61h03.q2kb185_87;Tb10.61.0540
Q867U7;Q384T0	Tb11.02.5250	H2BV	Histone H2B variant V	1.91401
Q57XR1	Tb927.7.6910		Uncharacterized protein	1.87369
Q57ZI7	Tb427.07.5000;Tb427.07.5020		60S ribosomal protein L19, putative	1.86918	Previous IDs: Tb427tmp.27E10.170;Tb427tmp.27E10.210;current=false
Q388C4;O76286	Tb927.10.14820;Tb927.10.14830;Tb927.10.14840	MCP5a;MCP5b;MCP5c	Mitochondrial ADP/ATP carrier protein 5a;Mitochondrial ADP/ATP carrier protein 5b;Mitochondrial ADP/ATP carrier protein 5c	1.86918	Previous IDs: TRYP_x-61h03.q2kb185_272;TRYP_x-61h03.q2kb185_273;TRYP_x-61h03.q2kb185_274;Tb10.61.1810;Tb10.61.1820;Tb10.61.1830
Q582M3	Tb427.07.6360	h2aZ	histone H2A variant	1.82165	Previous IDs: Tb427tmp.33N13.260;current=false
Q4FKV5	Tb09.v4.0013		chrIX additional, unordered contigs, retrotransposon hot spot (RHS) protein, putative	1.8112
Q386I7	Tb927.11.3240	TCP-1-zeta	T-complex protein 1, zeta subunit, putative	1.77292	Previous IDs: Tb11.02.0750;Tb11.02.0750:mRNA;Tb11.02.0750:pep
Q57W56	Tb11.01.7960		60S ribosomal protein L2, putative	1.77076
Q57XK9	Tb927.7.2650	CAP51V	Cytoskeleton associated protein 51V	1.76306	Previous IDs: Tb07.22O10.860
Q57XD5	Tb927.8.2540	SCP2	3-ketoacyl-CoA thiolase	1.7583	Previous IDs: Tb08.26A17.500
Q38CF6	Tb927.10.840	FAZ6	Flagellum attachment zone protein 6	1.75665	Previous IDs: TRYP_x-70a06.p2kb545_1007;Tb10.70.7320
Q38B42;P07752	Tb427.10.5620	ALD	fructose-bisphosphate aldolase, glycosomal	1.74954	Previous IDs: Tb427.10.1370;current=false;embl.242;current=false
Q383V7	Tb927.11.9720		40S ribosomal protein S27, putative	1.72398	Previous IDs: 237.t00934;Tb11.01.1475;Tb11.01.1475:mRNA;Tb11.01.1475:pep
Q38EA4	Tb927.9.8720	FBPase	fructose-1,6-bisphosphatase	1.71881	Previous IDs: Tb09.211.0540;Tb09.211.0540:mRNA;Tb09.211.0540:pep;chr9contig211.tmp0067c
Q57YL2	Tb927.8.6110	HMGS	3-hydroxy-3-methylglutaryl-CoA synthase, putative	1.69882	Previous IDs: Tb08.11J15.640
Q384J8	Tb11.01.0340		RAD50 DNA repair-like protein	1.6937
Q385C5	Tb927.11.6440	ENF	Essential Nuclear Factor, 49 kDa	1.6929	Previous IDs: Tb11.02.4300;Tb11.02.4300:mRNA;Tb11.02.4300:pep
Q4FKA8	Tb11.1380;Tb927.11.1840	CAP46	Cytoskeleton-associated protein 46 kDa	1.68821	Previous IDs: Tb11.39.0004;Tb11.39.0004:mRNA;Tb11.39.0004:pep
Q386F2	Tb11.v5.1059;Tb927.11.3590;Tb927.11.3600		40S ribosomal protein S4, putative	1.68658	Previous IDs: Tb11.02.1085;Tb11.02.1090;Tb11.02.1085:mRNA;Tb11.02.1085:pep;Tb11.02.1090:mRNA;Tb11.02.1090:pep
Q383E5;A0A0U2KFL3	Tb11.01.3110		Heat shock protein 70	1.68351
Q586M2	Tb927.2.2510		Uncharacterized protein	1.67158
Q384R3	Tb11.02.5420	CPR	NADPH-cytochrome p450 reductase, putative	1.66571	Previous IDs: NCDS.Tb927.11.7455
Q57WZ3	Tb427.03.1120	rtb2	GTP-binding nuclear protein rtb2, putative	1.658	Previous IDs: Tb427tmp.27F10.90;current=false
Q587B0	Tb927.6.4440	RBP42	RNA-binding protein 42 (RNA-binding motif protein 42)	1.65649	Previous IDs: Tb06.26G9.840
Q4FKG9;P19800	Tb11.0290		40S ribosomal protein S14	1.65629
Q584G9	Tb427.04.2180		60S ribosomal protein L35a, putative	1.63648	Previous IDs: Tb427tmp.1H19.150;current=false
Q582V9	Tb927.3.2460		hypothetical protein, conserved	1.62898	Previous IDs: Tb03.48O8.430
Q4FKD8	Tb11.0845;Tb927.11.18680;Tb927.11.715	DYNLL1;DYNLL2	chrXI additional, unordered contigs, dynein light chain LC8, putative;dynein light chain LC8, putative	1.59542	Previous IDs: NCDS.Tb927.11.711;Tb11.50.0007;Tb11.50.0007:mRNA;Tb11.50.0007:pep;Tb927.11.711
P50885	Tb427.10.9880;Tb427tmp.02.1840	RPL18;TbL18LP	60S ribosomal protein L18, putative	1.58576	Previous IDs: TRYP_xi-1013a02.q1k_74;TRYPtp6k15-3d06.p1c_64;Tb427tmp.6k15.0410;current=false
Q582R3	Tb927.3.4720	DLP1	dynamin-like protein 1	1.58368	Previous IDs: Tb03.48K5.290
Q38E94;P12432;P12433	Tb09.211.0620		Actin A	1.57607
Q4GYX7	TB927.1.2430		Histone H3, putative	1.54545
Q57VB1	Tb927.5.1520	HslU1	ATP-dependent protease ATPase subunit HslU1	1.53933	Previous IDs: Tb05.30H13.690
Q587H6	Tb927.2.2670		Histone H4	1.53867
Q584M7	Tb927.2.470	RHS4	retrotransposon hot spot protein 4 (RHS4), putative	1.52038
Q381B0	Tb11.01.8510		T-complex protein 1, alpha subunit, putative	1.51627
Q384J9	Tb927.11.8200		ribosomal protein S26, putative	1.51396	Previous IDs: 237.t00945;Tb11.01.0355;Tb11.01.0355:mRNA;Tb11.01.0355:pep
Q4GYY5	Tb427.01.2340;Tb427.01.2360;Tb427.01.2380;Tb427.01.2400		alpha tubulin	1.49297
Q38A89	Tb927.10.8850		A distinct subfamily of CDD/CDA-like deaminases, putative	1.49129	Previous IDs: TRYPtp6k15-3d06.p1c_244;Tb10.6k15.1650
Q38B00	Tb11.v5.0199;Tb927.10.6060	UMSBP2	universal minicircle sequence binding protein 2;universal minicircle sequence binding protein, putative	1.46731	Previous IDs: TRYP_x-70a06.p2kb545_119;Tb10.70.0820
Q9N942	Tb927.1.420	RHS5	retrotransposon hot spot protein 5 (RHS5), putative	1.44764
Q38CY8	Tb927.9.15110;Tb927.9.15170	L5	60S ribosomal protein L5, putative	1.43752	Previous IDs: Tb09.244.2730;Tb09.244.2740;Tb09.244.2730:mRNA;Tb09.244.2730:pep;Tb09.244.2740:mRNA;Tb09.244.2740:pep;Tb927.9.15150;Tb927.9.15150:mRNA;Tb927.9.15150:pep;chr9contig244a01.tmp0273;chr9contig244a01.tmp0274
Q38CI4	Tb927.10.560		40S ribosomal proteins S11, putative	1.42096	Previous IDs: 233.t00830;Tb10.70.7695
Q38D58;P69300	Tb09.211.4511	KMP-11/1	Kinetoplastid membrane protein 11	1.40336
Q38FR6	Tb09.160.1200		Mitotubule-associated protein Gb4, putative	1.38591
D7SGA2	Tb927.2.340	RHS4	retrotransposon hot spot protein 4 (RHS4), putative	1.3839
Q57ZX0	Tb927.5.2940	STI1	stress-induced protein sti1, putative	1.36005	Previous IDs: Tb05.26K5.210
Q38F34	Tb09.160.3710		Proliferating cell nuclear antigen	1.35388
Q38D54	Tb09.211.4540		RNA-binding protein, putative	1.3317
Q586H9;REV__Q386U3	Tb927.6.5070		Uncharacterized protein	1.33007
Q38D64;Q38D65	Tb09.211.4470		ADP-ribosylation factor, putative	1.31154
Q388C8	Tb927.10.14760		clathrin light chain, putative	1.30746	Previous IDs: TRYP_x-61h03.q2kb185_287;Tb10.61.1910
P86937;P86938	Tb927.11.13640	JBP1	Thymine dioxygenase JBP1	1.30204

## Sheet: SuppFile1b_WTNoYFPvTelR-TALE
UniProt ID	TriTryp ID	NAME	DESCRIPTION	-Log Student's T-test p-value WT_Tel-TALE	Previous ID(s)
Q57Z72	Tb927.5.3210	SUMO	small ubiquitin-related modifier	6.04916	Previous IDs: Tb05.27M3.260
Q57XY9	Tb927.3.1560	TIF2	TRF-Interacting Factor 2	5.91864	Previous IDs: Tb03.1J15.80
Q388B1	Tb927.10.14950	ZC3H40	Zinc finger CCCH domain-containing protein 40	5.34036	Previous IDs: TRYP_x-61h03.q2kb185_245;Tb10.61.1630
Q57ZN9	Tb927.5.1700	RPA2	replication Factor A 28 kDa subunit, putative	5.33218	Previous IDs: Tb05.1P6.900
Q388W1	Tb927.10.12850	TRF	ttaggg binding factor	5.28451	Previous IDs: Tb10.389.0680
Q388G3	Tb927.10.14390	POB3	FACT complex subunit POB3	5.19625	Previous IDs: TRYP_x-61h03.q2kb185_364;Tb10.61.2370
Q384B5	Tb927.11.9130	RPA1	Replication factor A protein 1	4.79264	Previous IDs: Tb11.01.0870;Tb11.01.0870:mRNA;Tb11.01.0870:pep
Q586J9	Tb927.2.2190	HDAC3	histone deacetylase 3	4.73133
Q385L3	Tb11.02.3250	POLQ	DNA polymerase theta	4.6653
Q383U2	Tb927.11.9870	TelAP1	Telomere-associated protein 1	4.65982	Previous IDs: Tb11.01.1630;Tb11.01.1630:mRNA;Tb11.01.1630:pep
Q388E8	Tb10.61.2130	HEL67	ATP-dependent RNA helicase HEL67	4.65268
Q386A6	Tb11.02.1566		variant surface glycoprotein (VSG)-related, putative	4.56414
Q382U0	Tb927.11.12410	KKT10	kinetoplastid kinetochore protein 10	4.46806	Previous IDs: Tb11.01.4230;Tb11.01.4230:mRNA;Tb11.01.4230:pep
Q388B3	Tb927.10.14930	ZC3H39	Zinc finger CCCH domain-containing protein 39	4.34687	Previous IDs: TRYP_x-61h03.q2kb185_255;Tb10.61.1690
Q581B7	Tb427.08.3970		oxidoreductase, putative	4.33566	Previous IDs: Tb427tmp.10J17.220;current=false
Q38DX4	Tb09.211.1800		hypothetical protein, conserved	4.32711
Q586Z9	Tb927.6.4330	TelAP2	telomere-associated protein	4.22519
Q585L9	Tb427.06.1920		hypothetical protein, conserved	4.19659	Previous IDs: Tb427tmp.28P18.1100;current=false
Q389P7	Tb927.10.10830	RESC13	RNA-editing substrate binding complex protein RESC13	4.17706	Previous IDs: Tb10.406.0050
Q585Y5	Tb927.6.3870	SGN1	RNA-binding protein, putative	4.07644
Q38FD7;Q38FE2	Tb09.v1.0150	TelAP3	hypothetical protein, conserved	4.05726
Q38DF6	Tb927.9.12510	DED1	ATP-dependent DEAD/H RNA helicase, putative	4.04964	Previous IDs: Tb09.211.3510;Tb09.211.3510:mRNA;Tb09.211.3510:pep;chr9contig211.tmp0394
Q57W35;Q57W36	Tb927.5.900		oligosaccharyl transferase subunit, putative	3.99208
Q38FD9;Q38FE4	Tb09.160.2550		ribosomal protein S7, putative	3.91032
Q38B20	Tb927.10.5840		translation elongation factor 1-beta, putative	3.89693	Previous IDs: TRYP_x-70a06.p2kb545_154;Tb10.70.1100
Q389I7;Q38EW1	Tb10.26.0370	RPS3	40S ribosomal protein S3, putative	3.88826
Q38B00	Tb11.v5.0199;Tb927.10.6060	UMSBP2	universal minicircle sequence binding protein 2;universal minicircle sequence binding protein, putative	3.87741	Previous IDs: TRYP_x-70a06.p2kb545_119;Tb10.70.0820
Q38CX3	Tb09.244.2630		40S ribosomal protein S6, putative	3.87033
Q38FF6	Tb927.9.3770		hypothetical protein, conserved	3.85022	Previous IDs: Tb09.160.2370;Tb09.160.2370:mRNA;Tb09.160.2370:pep;chr9contig160.tmp0203
Q38BZ3	Tb927.10.2520	ppl2	PrimPol-like protein 2	3.83951	Previous IDs: TRYP_x-70a06.p2kb545_702;Tb10.70.5160
Q586I4;P51408	Tb927.6.5120		60S acidic ribosomal protein P2, putative	3.81866
Q57VM1	Tb427.08.1330;Tb427.08.1340		60S ribosomal protein L7a, putative	3.80141	Previous IDs: Tb427tmp.29O4.580;Tb427tmp.29O4.590;current=false
Q38BR9	Tb927.10.3280		60S ribosomal proteins L38, putative	3.78354	Previous IDs: 233.t00829;Tb10.70.4155
Q580R3	Tb427.03.5620		hypothetical protein, conserved	3.77137	Previous IDs: Tb427tmp.5L5.860;current=false
Q382D5;Q382D7	Tb11.01.5590	NRBD2	nuclear RNA binding domain 2	3.75736
Q57U36	Tb927.7.180		Trypanosomal VSG domain containing protein, putative	3.74262
Q38B66;Q38B67	Tb10.70.1670		40S ribosomal protein S10, putative	3.71276
Q38BK6;Q38BK7	Tb10.70.3360		40S ribosomal protein S3A, putative	3.69551
Q57Z31	Tb927.5.4170		histone H4, putative	3.69411
Q57XC6	Tb927.8.2630	KIN-C	kinesin-C	3.68939	Previous IDs: Tb08.26A17.630
Q585J5	Tb427.04.3550;Tb427.05.1610		60S ribosomal protein L13a, putative	3.61942	Previous IDs: Tb427tmp.26G5.360;Tb427tmp.30H13.890;current=false
Q382C4	Tb927.10.3840;Tb927.11.14130		60S ribosomal protein L18a, putative;ribosomal protein L18, putative	3.59948	Previous IDs: TRYP_x-70a06.p2kb545_470;Tb11.01.5720;Tb10.70.3510;Tb11.01.5720:mRNA;Tb11.01.5720:pep
Q867U7;Q384T0	Tb11.02.5250	H2BV	Histone H2B variant V	3.53847
Q38B98;Q57WI3	Tb10.70.2170		ubiquitin/ribosomal protein S27a, putative	3.51823
Q38CY6;Q38C82	Tb09.244.2725		ribosomal protein L36, putative	3.51758
Q382K8	Tb927.11.13280	gBP25	Guide RNA binding protein 25	3.50955	Previous IDs: Tb11.01.4860;Tb11.01.4860:mRNA;Tb11.01.4860:pep
Q383E9;P20030	Tb11.01.3080	HSP70.1	heat shock protein 70, putative	3.49902
Q867G5;Q387X7	Tb10.61.1090	H3V	histone H3 variant V	3.49363
Q580H2	Tb927.8.1510	DBP2B	ATP-dependent RNA helicase DBP2B, putative	3.49184	Previous IDs: Tb08.29O9.160
Q386I7	Tb927.11.3240	TCP-1-zeta	T-complex protein 1, zeta subunit, putative	3.4869	Previous IDs: Tb11.02.0750;Tb11.02.0750:mRNA;Tb11.02.0750:pep
Q38DU2	Tb09.211.2150	PABP2	polyadenylate-binding protein 2	3.46979
Q57US8	Tb427.04.470		snoRNP protein GAR1, putative	3.45221	Previous IDs: Tb427tmp.5D20.620;current=false
Q57ZF2	Tb927.3.1590	MRB1590	mitochondrial RNA binding complex 1 subunit	3.44066	Previous IDs: Tb03.30P12.70
Q387F2	Tb927.11.980	NUP158	Nucleoporin NUP158	3.43471	Previous IDs: Tb11.03.0140;Tb11.03.0140:mRNA;Tb11.03.0140:pep
Q38CD0;Q587D5	Tb10.70.7010		60S ribosomal protein L9, putative	3.43254
Q386V3	Tb927.11.2050;Tb927.11.2060		60S acidic ribosomal protein P0, putative	3.42346	Previous IDs: Tb11.46.0001;Tb11.46.0002;Tb11.46.0001:mRNA;Tb11.46.0001:pep;Tb11.46.0002:mRNA;Tb11.46.0002:pep
Q388M8	Tb927.10.13710		Activator of Hsp90 ATPase, N-terminal/Activator of Hsp90 ATPase homolog 1-like protein, putative	3.40277	Previous IDs: TRYP_x-61h03.q2kb185_481;Tb10.61.3210
Q384B1;A4URT2	Tb11.01.0910		DNA topoisomerase III, putative	3.39016
Q57YA3	Tb427.07.2820;Tb427.07.2830;Tb427.07.2840;Tb427.07.2850;Tb427.07.2860;Tb427.07.2870;Tb427.07.2880;Tb427.07.2890;Tb427.07.2900;Tb427.07.2910;Tb427.07.2920;Tb427.07.2930;Tb427.07.2940		histone H2A, putative	3.38221	Previous IDs: Tb427tmp.13M20.510;Tb427tmp.13M20.520;Tb427tmp.13M20.530;Tb427tmp.13M20.540;Tb427tmp.13M20.550;Tb427tmp.13M20.560;Tb427tmp.13M20.570;Tb427tmp.13M20.580;Tb427tmp.13M20.590;Tb427tmp.13M20.600;Tb427tmp.13M20.610;Tb427tmp.13M20.620;Tb427tmp.13M20.630;current=false
Q384Y7	Tb927.11.6830		Domain of unknown function(DUF2779), putative	3.3765	Previous IDs: Tb11.02.4660;Tb11.02.4660:mRNA;Tb11.02.4660:pep
Q583T1;P55842;Q383F5	Tb927.6.720		40S ribosomal protein L14, putative	3.37291
Q57YF6	Tb927.8.750	NOPP44/46-2	nucleolar RNA-binding protein, putative	3.36613	Previous IDs: Tb08.12O16.320
Q389T1;Q389S5;Q389S0	Tb10.406.0330	H2B	histone H2B, putative	3.36585
Q57YL6	Tb427.08.6150;Tb427.08.6160		40S ribosomal protein S8, putative	3.35841	Previous IDs: Tb427tmp.11J15.560;Tb427tmp.11J15.570;current=false
Q582M3	Tb427.07.6360	h2aZ	histone H2A variant	3.35027	Previous IDs: Tb427tmp.33N13.260;current=false
Q38F38	Tb927.9.5150	SNU13	13 kDa ribonucleoprotein-associated protein, putative	3.33377	Previous IDs: Tb09.160.3670;Tb09.160.3670:mRNA;Tb09.160.3670:pep;chr9contig160.tmp0286
Q4GYX7	TB927.1.2430	H3	histone H3, putative	3.32885
Q57V37;Q57V35	Tb927.7.1730		60S ribosomal protein L7, putative	3.31964
Q38DK0	Tb927.9.11940	RPA3	replication factor A protein 3, putative	3.30456	Previous IDs: Tb09.211.3050;Tb09.211.3050:mRNA;Tb09.211.3050:pep;chr9contig211.tmp0346
Q383K0;Q383I8	Tb11.01.2560		40S ribosomal protein SA, putative	3.29644
Q581X8	Tb927.8.2040		Domain of unknown function (DUF1767), putative	3.27473	Previous IDs: Tb08.26N11.520
Q57U30	Tb427.07.230;Tb427.07.240		40S ribosomal protein S33, putative	3.24607	Previous IDs: Tb427tmp.8P12.310;Tb427tmp.8P12.320;current=false
Q38DK9	Tb927.9.11850	SMC1	structural maintenance of chromosome 1, putative	3.24463	Previous IDs: Tb09.211.2970;Tb09.211.2970:mRNA;Tb09.211.2970:pep;chr9contig211.tmp0337
Q381J6	Tb927.11.15880;Tb927.11.15900		60S ribosomal protein L27, putative	3.2219	Previous IDs: Tb11.01.7535;Tb11.01.7545;Tb11.01.7535:mRNA;Tb11.01.7535:pep;Tb11.01.7545:mRNA;Tb11.01.7545:pep
Q38A10	Tb927.10.9650	NUP152	Nucleoporin NUP152	3.21082	Previous IDs: TRYPtp6k15-3d06.p1c_100;Tb10.6k15.0690
Q57WZ3	Tb427.03.1120	rtb2	GTP-binding nuclear protein rtb2, putative	3.20105	Previous IDs: Tb427tmp.27F10.90;current=false
Q38AL4	Tb927.10.7500	NOP1	fibrillarin	3.17319	Previous IDs: TRYPtp6k15-3d06.p1c_454;Tb10.6k15.3160;embl.30
P17843;D7SG81	Tb11.02.0740		60S ribosomal protein L44	3.16317
Q381S2	Tb927.11.15130	J7	DnaJ homolog, putative	3.16019	Previous IDs: Tb11.01.6780;Tb11.01.6780:mRNA;Tb11.01.6780:pep
Q38BI9;P49153;Q38BI8	Tb10.70.3170	RPL30	60S ribosomal protein L30	3.10128
Q57ZQ1	Tb427.05.1820		60S acidic ribosomal protein, putative	3.10116	Previous IDs: Tb427tmp.1P6.710;current=false
Q38CI4	Tb927.10.560		40S ribosomal proteins S11, putative	3.09262	Previous IDs: 233.t00830;Tb10.70.7695
P86938;P86937				3.06917
Q383R3	Tb927.11.10160		60S ribosomal protein L22, putative	3.03325	Previous IDs: Tb11.01.1920;Tb11.01.1920:mRNA;Tb11.01.1920:pep
Q388E0;Q388C9	Tb10.61.2040		fibrillarin, putative	3.01313
Q38F23	Tb09.160.3820		nucleolar RNA binding protein, putative	2.99183
Q381T5	Tb927.11.15000	TbSMN	survival of motor neuron (SMN)-like protein	2.9911	Previous IDs: Tb11.01.6640;Tb11.01.6640:mRNA;Tb11.01.6640:pep
Q38CM1	Tb927.10.170	CBF5	pseudouridine synthase, Cbf5p	2.97692	Previous IDs: Tb10.100.0060
Q581Q1;Q581Q2	Tb927.4.1800	MRPL3	Mitochondrial ribosomal protein L3	2.97666
Q57X06	Tb427.08.5760		hypothetical protein, conserved	2.97176	Previous IDs: Tb427tmp.26E13.490;current=false
Q38DP2	Tb09.211.2630		60S ribosomal protein L23, putative	2.95371
Q57UX1	Tb927.8.4810	PHB1	prohibitin 1	2.95248
B2ZWB7	Tb11.v5.0214;Tb927.5.295b	RHS1	retrotransposon hot spot (RHS) protein, putative;retrotransposon hotspot (RHS) protein 1	2.95245
Q38CF6	Tb927.10.840	FAZ6	Flagellum attachment zone protein 6	2.94171	Previous IDs: TRYP_x-70a06.p2kb545_1007;Tb10.70.7320
Q580Z5	Tb927.8.3750	NOP56	nucleolar protein 56	2.93652	Previous IDs: Tb08.10J17.600
Q383Y9	Tb927.11.9400		hypothetical protein, conserved	2.92307	Previous IDs: Tb11.01.1170;Tb11.01.1170:mRNA;Tb11.01.1170:pep
Q382C7	Tb927.11.14100	DRBD4	Double RNA-binding domain containing protein 4	2.90222	Previous IDs: Tb11.01.5690;Tb11.01.5690:mRNA;Tb11.01.5690:pep
Q389Z6	Tb927.10.9800		60S ribosomal protein L22	2.9014	Previous IDs: TRYPtp6k15-3d06.p1c_76;Tb10.6k15.0510
Q383V8	Tb927.10.13500;Tb927.11.9710	RPL10A	60S ribosomal protein L10a;60S ribosomal protein L10a, putative	2.89776	Previous IDs: Tb10.05.0220;Tb11.01.1470;Tb11.01.1470:mRNA;Tb11.01.1470:pep
Q383V7	Tb927.11.9720		40S ribosomal protein S27, putative	2.89421	Previous IDs: 237.t00934;Tb11.01.1475;Tb11.01.1475:mRNA;Tb11.01.1475:pep
Q57WD3	Tb927.3.3970		Cell growth-regulating nucleolar protein, putative	2.88988	Previous IDs: Tb03.28C22.230
Q388D3	Tb927.10.14600;Tb927.10.14710	RPS2	40S ribosomal protein S2, putative	2.86823	Previous IDs: TRYP_x-61h03.q2kb185_295;TRYP_x-61h03.q2kb185_310;Tb10.61.1960;Tb10.61.2070
Q382Z8	Tb927.11.11820;Tb927.11.11830		40S ribosomal protein S17, putative	2.86461	Previous IDs: 237.t00946;237.t00947;Tb11.01.3675;Tb11.01.3675:mRNA;Tb11.01.3675:pep;Tb11.01.3676;Tb11.01.3676:mRNA;Tb11.01.3676:pep
Q385B8;Q385B9	Tb11.02.4360		40S ribosomal protein S21, putative	2.85736
Q583I9	Tb427.04.2040	ALBA3	hypothetical protein, conserved	2.84955	Previous IDs: Tb427tmp.29M18.710;current=false
P50885	Tb427.10.9880;Tb427tmp.02.1840	RPL18;TbL18LP	60S ribosomal protein L18, putative	2.84352	Previous IDs: TRYP_xi-1013a02.q1k_74;TRYPtp6k15-3d06.p1c_64;Tb427tmp.6k15.0410;current=false
Q57ZM3	Tb427.03.2890		radial spoke protein RSP10, putative	2.80551	Previous IDs: Tb427tmp.27C5.280;current=false
Q386P3	Tb927.11.2670	NUP59	Nucleoporin NUP59	2.79615	Previous IDs: Tb11.02.0270;Tb11.02.0270:mRNA;Tb11.02.0270:pep
Q38E83	Tb927.9.9060	LSM12	Lsm12 protein, putative	2.7934	Previous IDs: Tb09.211.0740;Tb09.211.0740:mRNA;Tb09.211.0740:pep;chr9contig211.tmp0091c
Q38AZ9	Tb927.10.6070	UMSBP1	universal minicircle sequence binding protein 1	2.79308	Previous IDs: TRYP_x-70a06.p2kb545_117;Tb10.70.0800
Q386Y4	Tb927.11.1700		hypothetical protein, conserved	2.77907	Previous IDs: Tb11.55.0010;Tb11.55.0010:mRNA;Tb11.55.0010:pep
Q38DT1	Tb09.211.2260	KKT3	kinetoplastid kinetochore protein 3	2.76922
Q57WA5	Tb427.03.3690		flagellar radial spoke protein-like, putative	2.73578	Previous IDs: Tb427tmp.28C22.890;current=false
Q38CD4	Tb927.10.1060	TCP-1-delta	T-complex protein 1, delta subunit, putative	2.72373	Previous IDs: TRYP_x-70a06.p2kb545_973;Tb10.70.7050
Q584M6;Q8IFJ1	Tb927.2.510	RHS4	retrotransposon hot spot protein 4 (RHS4), putative	2.71284
Q57WZ2	Tb427.03.1110	PIFTA1	flagellar transport protein, putative	2.70747	Previous IDs: Tb427tmp.27F10.120;current=false
Q384J9	Tb927.11.8200		ribosomal protein S26, putative	2.69367	Previous IDs: 237.t00945;Tb11.01.0355;Tb11.01.0355:mRNA;Tb11.01.0355:pep
Q383L0	Tb927.11.10690		hypothetical protein, conserved	2.68251	Previous IDs: Tb11.01.2460;Tb11.01.2460:mRNA;Tb11.01.2460:pep
Q383Y5	Tb927.11.9440	CMF63	Component of motile flagella 63	2.66733	Previous IDs: Tb11.01.1210;Tb11.01.1210:mRNA;Tb11.01.1210:pep
Q57YE1	Tb427.08.900	TSR1	splicing factor TSR1	2.6498	Previous IDs: Tb427tmp.12O16.540;current=false
Q38B58;Q38B56	Tb10.70.1560		60S ribosomal protein L24, putative	2.64952
Q38C07	Tb927.10.2370	LA	Lupus La protein homolog, putative	2.63352	Previous IDs: TRYP_x-70a06.p2kb545_728;Tb10.70.5360
Q389P1	Tb11.v5.0543;Tb927.10.10890;Tb927.10.10900;Tb927.10.10920;Tb927.10.10940;Tb927.10.10950;Tb927.10.10960		Heat shock protein 83, putative;heat shock protein, putative	2.62284	Previous IDs: Tb10.329.0050;Tb10.329.0060;Tb10.329.0080;Tb10.329.0100;Tb10.329.0110;Tb10.329.0120
Q389K1	Tb927.10.11390		60S ribosomal protein L6, putative	2.61997	Previous IDs: Tb10.26.0560
Q38A35	Tb927.10.9400	SF1	splicing factor 1	2.60968	Previous IDs: TRYPtp6k15-3d06.p1c_142;Tb10.6k15.1000
Q580D8;Q4FKD4	Tb927.4.1100		ribosomal protein L21E (60S), putative	2.55998
Q585L0	Tb927.4.3400		hypothetical protein, conserved	2.55756	Previous IDs: Tb04.26G5.100
Q38EY6	Tb927.9.5690		60S acidic ribosomal protein, putative	2.55525	Previous IDs: Tb09.160.4200;Tb09.160.4200:mRNA;Tb09.160.4200:pep;chr9contig160.tmp0317
Q57UY7	Tb927.8.4640	CARP9	cAMP response protein 9	2.51477
Q580T8	Tb427.03.5370		hypothetical protein, conserved	2.50698	Previous IDs: Tb427tmp.5L5.570;current=false
Q385D9	Tb927.11.6300		40S ribosomal protein S5, putative	2.49573	Previous IDs: Tb11.02.4170;Tb11.02.4170:mRNA;Tb11.02.4170:pep
Q71SQ4;Q38EX8	Tb09.160.4250	TRYP1	tryparedoxin peroxidase	2.49343
Q57WX6	Tb927.3.930	OADalpha	dynein heavy chain, putative	2.47451	Previous IDs: Tb03.27F10.490
Q57V53	Tb927.3.3330	HSP20	heat shock protein 20, putative	2.4705	Previous IDs: Tb03.3K10.400
Q38BV4	Tb10.70.4700	TSR1IP	splicing factor PTSR1 interacting protein	2.46913
Q38BK1	Tb927.10.3990	DHH1	DHH1	2.46578	Previous IDs: TRYP_x-70a06.p2kb545_441;Tb10.70.3290
Q382W0	Tb927.11.12210		Domain of unknown function (DUF4586), putative	2.46139	Previous IDs: Tb11.01.4030;Tb11.01.4030:mRNA;Tb11.01.4030:pep
Q387J6	Tb927.11.550	SCD6	Suppressor of clathrin deficiency 6, putative	2.45511	Previous IDs: Tb11.03.0530;Tb11.03.0530:mRNA;Tb11.03.0530:pep
Q38BC1	Tb10.70.2400		Uncharacterized protein	2.44838
Q57VW1	Tb927.5.520		Stomatin-like protein, putative	2.44438
Q383M5	Tb927.11.10540		hypothetical protein, conserved	2.43446	Previous IDs: Tb11.01.2310;Tb11.01.2310:mRNA;Tb11.01.2310:pep
Q383E5;A0A0U2KFL3	Tb11.01.3110		Heat shock protein 70	2.41568
Q57ZW1	Tb427.05.2850		radial spoke protein RSP2, putative	2.40466	Previous IDs: Tb427tmp.26K5.370;current=false
Q386L6	Tb927.11.2950	NUP89	Nucleoporin NUP89	2.393	Previous IDs: Tb11.02.0460;Tb11.02.0460:mRNA;Tb11.02.0460:pep
Q385M4	Tb927.11.5440		NADP-dependent malic enzyme, cytosolic	2.37593	Previous IDs: Tb11.02.3120;Tb11.02.3120:mRNA;Tb11.02.3120:pep;Tb11.212.0950
Q586X9	Tb927.2.3580	TFIIS2-1	transcription elongation factor s-II, putative	2.37455
Q38A80	Tb927.10.8940	KH1	flagellum targeting protein kharon1, putative	2.37276	Previous IDs: TRYPtp6k15-3d06.p1c_221;Tb10.6k15.1500
Q386F2	Tb11.v5.1059;Tb927.11.3590;Tb927.11.3600		40S ribosomal protein S4, putative	2.37119	Previous IDs: Tb11.02.1085;Tb11.02.1090;Tb11.02.1085:mRNA;Tb11.02.1085:pep;Tb11.02.1090:mRNA;Tb11.02.1090:pep
Q38AE5	Tb927.10.8190		T-complex protein 1, theta subunit, putative	2.36724	Previous IDs: TRYPtp6k15-3d06.p1c_341;Tb10.6k15.2330
Q38D34	Tb927.9.14220	MCA5	metacaspase 5, putative	2.35908	Previous IDs: Tb09.211.4760;Tb09.211.4760:mRNA;Tb09.211.4760:pep;chr9contig211.tmp0524c;embl.369
Q57Z07	Tb427.05.4420		nucleolar RNA helicase Gu, putative	2.35614	Previous IDs: Tb427tmp.45E22.770;current=false
Q38EI9	Tb927.9.7590;Tb927.9.7620	L11	60S ribosomal protein L11, putative	2.35529	Previous IDs: Tb09.160.5580;Tb09.160.5590;Tb09.160.5580:mRNA;Tb09.160.5580:pep;Tb09.160.5590:mRNA;Tb09.160.5590:pep;chr9contig160.tmp0444c;chr9contig160.tmp0445c
Q382B2	Tb927.11.14250	TCP-1-epsilon	T-complex protein 1, epsilon subunit, putative	2.3416	Previous IDs: Tb11.01.5860;Tb11.01.5860:mRNA;Tb11.01.5860:pep
Q57Z55	Tb927.5.3400		Calcium-transporting ATPase	2.33861
Q38E94;P12432;P12433	Tb09.211.0620		Actin A	2.33543
Q580D6	Tb927.4.1080	VAA	V-type ATPase, A subunit, putative	2.32301	Previous IDs: Tb04.5E12.370
Q581A7	Tb927.8.3870	NOP127	Nucleolar protein 127	2.29812	Previous IDs: Tb08.10J17.380
Q385R8	Tb927.11.5000	DNAI1	Dynein intermediate chain 1, axonemal	2.25912	Previous IDs: Tb11.02.2640;Tb11.02.2640:mRNA;Tb11.02.2640:pep
Q57UZ3	Tb927.8.4580	BBP58	Basal body protein	2.25836	Previous IDs: Tb08.4A8.180
Q388D4	Tb927.10.14700		hypothetical protein, conserved	2.2543	Previous IDs: TRYP_x-61h03.q2kb185_296;Tb10.61.1970
Q57YZ8	Tb427.08.3150	TCP-1-gamma	T-complex protein 1, gamma subunit, putative	2.24075	Previous IDs: Tb427tmp.28L1.90;current=false
Q38DP9	Tb927.9.11270	TCP-1-eta	t- complex protein 1 (eta subunit), putative, T-complex protein 1, eta subunit, putative	2.2306	Previous IDs: Tb09.211.2570;Tb09.211.2570:mRNA;Tb09.211.2570:pep;chr9contig211.tmp0295
Q57U69	Tb927.5.3970		Adenylate kinase, putative	2.22654
Q38DH8	Tb927.9.12200;Tb927.9.12240		60S ribosomal subunit protein L31, putative	2.21681	Previous IDs: Tb09.211.3270;Tb09.211.3280;Tb09.211.3270:mRNA;Tb09.211.3270:pep;Tb09.211.3280:mRNA;Tb09.211.3280:pep;chr9contig211.tmp0370;chr9contig211.tmp0371
Q57V56	Tb927.3.3300		Uncharacterized protein	2.21169
Q38FS0	Tb09.160.1160		Uncharacterized protein	2.2003
Q385C5	Tb927.11.6440	ENF	Essential Nuclear Factor, 49 kDa	2.19728	Previous IDs: Tb11.02.4300;Tb11.02.4300:mRNA;Tb11.02.4300:pep
Q586Z6;Q586Z5;A0A0M4HMZ4	Tb927.6.4300		Glyceraldehyde-3-phosphate dehydrogenase	2.17683
Q38AX3	Tb10.70.0500		Uncharacterized protein	2.16251
Q584Q1	Tb427.06.2550	TRRM2	RNA-binding protein, putative	2.16213	Previous IDs: Tb427tmp.4M18.1180;current=false
Q57VP3;P17959	Tb10.70.1380		40S ribosomal protein S9, putative	2.1612
P86939;P86934;P86933	Tb10.70.5670		Elongation factor 1-alpha 2	2.15709
Q585G9	Tb927.2.1080	RHS5	retrotransposon hot spot protein 5 (RHS5), putative	2.1556
Q38EX6	Tb927.9.5900	GDH	glutamate dehydrogenase	2.1507	Previous IDs: Tb09.160.4310;Tb09.160.4310:mRNA;Tb09.160.4310:pep;chr9contig160.tmp0326
Q57WB1	Tb427.03.3750	PFC7	paraflagellar rod component, putative	2.14458	Previous IDs: Tb427tmp.28C22.770;current=false
Q38F14	Tb927.9.5410	MC14	microtubule inner protein MC14	2.14099	Previous IDs: Tb09.160.3930;Tb09.160.3930:mRNA;Tb09.160.3930:pep;chr9contig160.tmp0304
Q4GYY5	Tb427.01.2340;Tb427.01.2360;Tb427.01.2380;Tb427.01.2400		alpha tubulin	2.13414
Q9NJP9;Q38DF2;Q38DE9;Q38DF3;Q38DF0	Tb09.211.3550	glk1	glycerol kinase, glycosomal	2.13179
Q587B0	Tb927.6.4440	RBP42	RNA-binding protein 42 (RNA-binding motif protein 42)	2.13033	Previous IDs: Tb06.26G9.840
Q387K0;Q387K1	Tb11.03.0580		RNA-binding protein, putative	2.12941
Q382Y3	Tb927.11.11965;Tb927.11.11975;Tb927.11.11980	CAP15	cytoskeleton-associated protein 15;cytoskeleton-associated protein, putative	2.12722	Previous IDs: NCDS.Tb927.11.11965;NTCDS.Tb11.NT.142;Tb11.01.3805;Tb11.01.3805:mRNA;Tb11.01.3805:pep
Q57Z10	Tb427.05.4390		hypothetical protein, conserved	2.12178	Previous IDs: Tb427tmp.45E22.740;current=false
Q384J8	Tb11.01.0340		RAD50 DNA repair-like protein	2.09689
Q38FF7	Tb927.9.3760	GLE2	Nucleoporin GLE2	2.09306	Previous IDs: Tb09.160.2360;Tb09.160.2360:mRNA;Tb09.160.2360:pep;chr9contig160.tmp0202
Q57UP8	Tb927.7.4180	ELO1	Fatty acid elongase	2.0915
Q57XR0	Tb927.7.6900	SCC1	Sister chromatid cohesion protein 1	2.08769	Previous IDs: Tb07.21H15.570
Q38AM9	Tb927.10.7330;Tb927.10.7340		40S ribosomal protein S24E, putative	2.08221	Previous IDs: TRYPtp6k15-3d06.p1c_475;TRYPtp6k15-3d06.p1c_476;Tb10.6k15.3340;Tb10.6k15.3350
Q57VB7	Tb927.5.1460		Possible lysine decarboxylase, putative	2.06192	Previous IDs: Tb05.30H13.580
Q584G9	Tb427.04.2180		60S ribosomal protein L35a, putative	2.05761	Previous IDs: Tb427tmp.1H19.150;current=false
Q4GYE7	Tb927.1.4310	FAZ2	Flagellum attachment zone protein 2	2.05185
Q581U8	Tb427.04.1330		DNA topoisomerase IB, large subunit	2.04994	Previous IDs: Tb427tmp.2L9.490;current=false
Q387Q3	Tb10.61.0150		Inosine-5-monophosphate dehydrogenase	2.03813
Q57ZS7	Tb927.5.2080	GMPR	GMP reductase	2.03297	Previous IDs: Tb05.1P6.110
Q57TY3	Tb927.7.7460	Z41AP	ZC3H41-associated protein	2.02618	Previous IDs: Tb07.30D13.320
Q38EC5	Tb927.9.8070;Tb927.9.8420	QM	QM-like protein, 60S ribosomal protein L10, putative	2.02425	Previous IDs: Tb09.211.0110;Tb09.211.0340;Tb09.211.0110:mRNA;Tb09.211.0110:pep;Tb09.211.0340:mRNA;Tb09.211.0340:pep;chr9contig211.tmp0011c;chr9contig211.tmp0042c
Q4GYY6	Tb427.01.2330;Tb427.01.2350;Tb427.01.2370;Tb427.01.2390		beta tubulin	2.0206
Q386W3	Tb11.46.0011		Uncharacterized protein	2.01949
Q582N2;P49669	Tb927.3.5050		60S ribosomal protein L4	2.01667
Q57WJ7;Q57XZ9	Tb927.8.8330		Calpain, putative	2.01375
Q57YQ5;Q580Q1	Tb927.8.6980		Uncharacterized protein	2.00822
Q57VV0	Tb927.7.1040		40S ribosomal protein S16, putative	1.99479
Q586C2	Tb927.10.15120;Tb927.2.5910		40S ribosomal protein S13, putative	1.98681	Previous IDs: TRYP_x-61h03.q2kb185_209;Tb10.61.1390
Q57XN7	Tb427.07.2340;Tb427.07.2370		40S ribosomal protein S15, putative	1.98481	Previous IDs: Tb427tmp.22O10.320;Tb427tmp.22O10.360;current=false
Q583K7	Tb427.04.1860		ribosomal protein S19, putative	1.98463	Previous IDs: Tb427tmp.29M18.160;current=false
Q382A7	Tb927.11.14300	IC70	Dynein intermediate chain, axonemal	1.98293	Previous IDs: Tb11.01.5910;Tb11.01.5910:mRNA;Tb11.01.5910:pep
Q38AC1	Tb927.10.8430		40S ribosomal protein S12, putative	1.98041	Previous IDs: TRYPtp6k15-3d06.p1c_305;Tb10.6k15.2050
Q582N1	Tb427.03.5060		hypothetical protein, conserved	1.9574	Previous IDs: Tb427tmp.48K5.840;current=false
Q587E3	Tb927.6.4770		Uncharacterized protein	1.95491
Q57XR1	Tb927.7.6910		Uncharacterized protein	1.93874
Q583S0	Tb927.6.2640	KAP60	importin alpha subunit, putative	1.93854	Previous IDs: Tb06.5F5.40
P50098			Inosine-5-monophosphate dehydrogenase	1.93839
D7SGA2;Q57UU9;Q57UU8;Q57UU7;Q57UU6;Q57UU5	Tb927.2.340		Retrotransposon hot spot (RHS) protein, putative	1.9225
B3GVF2;B3GVP0;B3GVM9	Tb427.BES15.2		Expression site-associated gene 7 (ESAG7) protein	1.92246
Q4GYZ5	Tb927.1.2260	SMP1-2	small myristoylated protein 1-2	1.90923
Q38CW7	Tb09.244.2570		Calcium motive P-type ATPase, putative	1.90133
Q384P4	Tb927.11.7740		dynein light chain, putative	1.89907	Previous IDs: Tb11.02.5620;Tb11.02.5620:mRNA;Tb11.02.5620:pep
Q38B69	Tb10.70.1730		40S ribosomal protein S18, putative	1.897
Q57XK6	Tb927.3.3560		U-box domain containing protein, putative	1.89265	Previous IDs: Tb03.25B21.20
Q38C01	Tb927.10.2440	MCA4	Metacaspase-4	1.88379	Previous IDs: Tb10.70.5250;embl.368
Q57W56	Tb11.01.7960		60S ribosomal protein L2, putative	1.87561
Q4GYQ5	TB927.1.3180		40S ribosomal protein S11, putative	1.87005
Q38E79	Tb927.9.9100		hypothetical protein, conserved	1.85653	Previous IDs: 229.t01421;Tb09.211.0775;Tb09.211.0775:mRNA;Tb09.211.0775:pep
Q385W9	Tb927.11.4480	RSP4/6	Flagellar radial spoke protein 4/6	1.85401	Previous IDs: TRYP_xi-1013a02.q1k_47;Tb11.02.2060;Tb11.02.2060:mRNA;Tb11.02.2060:pep
Q586V1	Tb927.2.4230		NUP-1 protein, putative	1.83941
Q385T6	Tb927.10.14580;Tb927.11.4820		60S ribosomal protein L17, putative	1.83575	Previous IDs: TRYP_x-61h03.q2kb185_314;Tb11.02.2430;Tb10.61.2090;Tb11.02.2430:mRNA;Tb11.02.2430:pep
Q384Q0	Tb927.11.7560	CMF15	Component of motile flagella 15	1.83423	Previous IDs: Tb11.02.5550;Tb11.02.5550:mRNA;Tb11.02.5550:pep
Q57W54	Tb927.5.1090		Threonyl-tRNA synthetase, putative	1.8271
Q386P9	Tb927.11.2610	CAP50	Cytoskeleton-associated protein 50 kDa	1.80995	Previous IDs: Tb11.02.0210;Tb11.02.0210:mRNA;Tb11.02.0210:pep
Q584J5	Tb927.4.5110	kkt8	kinetoplastid kinetochore protein 8	1.80822	Previous IDs: Tb04.3M17.600
Q38CZ1	Tb927.9.15090		cytosolic coat protein, putative	1.80727	Previous IDs: Tb09.244.2760;Tb09.244.2760:mRNA;Tb09.244.2760:pep;chr9contig244a01.tmp0276
Q38D54	Tb09.211.4540		RNA-binding protein, putative	1.80114
Q38F93	Tb09.160.3090	HSP70.a	heat shock protein, putative	1.79959
Q57WF2	Tb927.7.3370	IFT74	Intraflagellar transport protein 74, putative	1.77778	Previous IDs: Tb07.28B13.700
Q383S6	Tb927.11.10025;Tb927.11.10030		60S ribosomal protein L29, putative	1.77132	Previous IDs: NTCDS.Tb11.NT.118;Tb11.01.1790;Tb11.01.1790:mRNA;Tb11.01.1790:pep;Tb11.NT.118_2
Q57WH0	Tb927.7.3550	WCB	cytoskeleton associated protein, putative	1.76019	Previous IDs: Tb07.28B13.500
Q57ZI7	Tb427.07.5000;Tb427.07.5020		60S ribosomal protein L19, putative	1.753	Previous IDs: Tb427tmp.27E10.170;Tb427tmp.27E10.210;current=false
Q385D2	Tb927.11.6370		leucine-rich repeat protein (LRRP), putative	1.73759	Previous IDs: Tb11.02.4230;Tb11.02.4230:mRNA;Tb11.02.4230:pep
Q57UT9	Tb927.4.360		Uncharacterized protein	1.73507
Q57VT4	Tb427.07.880	RPB25	RNA-binding protein, putative	1.73257	Previous IDs: Tb427tmp.29K4.370;current=false
Q57ZX1	Tb927.5.2950	CMF3	Component of motile flagella 3	1.72589	Previous IDs: Tb05.26K5.190
Q4FKG9;P19800	Tb11.0290		40S ribosomal protein S14	1.72491
Q587D3	Tb927.6.4670		Uncharacterized protein	1.719
Q38EV6	Tb09.160.4520		Calmodulin, putative	1.71897
Q386W9	Tb927.11.1900		T-complex protein 1, beta subunit, putative	1.71744	Previous IDs: Tb11.42.0003;Tb11.42.0003:mRNA;Tb11.42.0003:pep
Q384D3	Tb927.11.8950	LRRP1	leucine rich repeat	1.71372	Previous IDs: Tb11.01.0680;Tb11.01.0680:mRNA;Tb11.01.0680:pep
Q57VB1	Tb927.5.1520	HslU1	ATP-dependent protease ATPase subunit HslU1	1.71354	Previous IDs: Tb05.30H13.690
Q38D64;Q38D65	Tb09.211.4470		ADP-ribosylation factor, putative	1.70781
Q383V3	Tb927.11.9760		hypothetical protein, conserved	1.70666	Previous IDs: Tb11.01.1510;Tb11.01.1510:mRNA;Tb11.01.1510:pep
Q386G1	Tb927.11.3500		Dpy-30 motif containing protein, putative	1.69844	Previous IDs: Tb11.02.0990;Tb11.02.0990:mRNA;Tb11.02.0990:pep
Q57WF9	Tb927.7.3440	CAP27	Cytoskeleton-associated protein 27 kDa	1.69716	Previous IDs: Tb07.28B13.630
Q383T1	Tb927.11.9980		2-oxoglutarate dehydrogenase E1 component, putative	1.68973	Previous IDs: Tb11.01.1740;Tb11.01.1740:mRNA;Tb11.01.1740:pep
Q4GYV5	TB927.1.2670		Axoneme central apparatus protein, putative importin alpha-1 subunit, putative	1.6889
Q38CZ5	Tb927.9.15050	DRC4	nexin-dynein regulatory complex 4	1.68609	Previous IDs: Tb09.244.2800;Tb09.244.2800:mRNA;Tb09.244.2800:pep;chr9contig244a01.tmp0280
Q57YE9	Tb927.8.820		VID27 cytoplasmic protein, putative	1.67636	Previous IDs: Tb08.12O16.390
Q57WI9	Tb427.07.3740		hypothetical protein, conserved	1.67557	Previous IDs: Tb427tmp.28B13.90;current=false
Q57YK4;Q38D53	Tb927.8.6030		60S ribosomal protein L12, putative	1.67078
Q387E7	Tb927.11.1030	kkt7	kinetoplastid kinetochore protein 7	1.66625	Previous IDs: Tb11.03.0080;Tb11.03.0080:mRNA;Tb11.03.0080:pep
M4HZ01;Q580N4;Q580N3	Tb927.3.4080		Pyruvate transporter 0	1.666
Q6Q833		lap	Cytosolic leucyl aminopeptidase	1.66598
Q57VR7	Tb927.7.710		Heat shock 70 kDa protein, putative	1.65398
Q9GPE9;Q57XX1	Tb427.03.1380		ATP synthase subunit beta, mitochondrial	1.65362
Q381A5	Tb927.11.16810		dynein light intermediate chain D1bLIC, putative	1.64406	Previous IDs: Tb11.01.8570;Tb11.01.8570:mRNA;Tb11.01.8570:pep
Q38D21	Tb09.211.4890		Casein kinase II, putative	1.6326
Q387A9	Tb927.11.1430	CMF2	Component of motile flagella 2	1.63103	Previous IDs: Tb11.47.0006;Tb11.47.0006:mRNA;Tb11.47.0006:pep
Q583I5	Tb927.4.2080	CC2D	Coiled-coil and C2 domain-containing protein	1.62175	Previous IDs: Tb04.29M18.770
O15648;D6XDN4	Tb927.3.3270	PFK	ATP-dependent 6-phosphofructokinase, glycosomal	1.61947	Previous IDs: Tb03.3K10.320
Q586R7;Q26692	Tb927.2.4710		RNA-binding protein, putative	1.61696
Q585H2	Tb927.2.1210		Retrotransposon hot spot (RHS) protein, putative	1.61659
Q386D5	Tb11.02.1260		Uncharacterized protein	1.61362
Q387T9	Tb927.10.15750	p197	Tripartite attachment complex protein 197	1.6126	Previous IDs: TRYP_x-61h03.q2kb185_88;TRYP_x-61h03.q2kb185_89;Tb10.61.0550;Tb10.61.0560
Q38EN1	Tb927.9.7110		GRAM domain containing protein, putative	1.60779	Previous IDs: Tb09.160.5200;Tb09.160.5200:mRNA;Tb09.160.5200:pep;Tb927.9.7130;Tb927.9.7130:mRNA;Tb927.9.7130:pep;chr9contig160.tmp0406
Q585H0	Tb927.2.1170	RHS5	retrotransposon hot spot protein 5 (RHS5), putative	1.6034
Q57V54;Q57V55	Tb927.3.3320		60S ribosomal protein L13, putative	1.5846
Q38C12	Tb10.70.5410		Uncharacterized protein	1.58446
Q386P5	Tb927.11.2650	TRAP1	heat shock protein 84, putative	1.55997	Previous IDs: Tb11.02.0250;Tb11.02.0250:mRNA;Tb11.02.0250:pep
Q57TU7	Tb927.8.6660		Uncharacterized protein	1.55239
Q386I6	Tb927.11.3250	OADbeta	dynein heavy chain, putative	1.53559	Previous IDs: Tb11.02.0760;Tb11.02.0760:mRNA;Tb11.02.0760:pep
Q57XD5	Tb927.8.2540	SCP2	3-ketoacyl-CoA thiolase	1.53479	Previous IDs: Tb08.26A17.500
Q580A3	Tb427.04.750		50S ribosomal protein L7Ae, putative	1.53138	Previous IDs: Tb427tmp.5E12.940;current=false
Q585N5	Tb427.06.1760	KU80	KU80 protein	1.53132	Previous IDs: Tb427tmp.28P18.670;current=false
Q585R0;O97157	Tb927.6.1500		Alkyl-dihydroxyacetone phosphate synthase	1.52368
Q387L4;C1JEX5	Tb11.03.0760	RAP1	Uncharacterized protein	1.52116
Q57XX0	Tb10.70.4800		40S ribosomal protein S25, putative	1.49767
Q584M7	Tb927.2.470	RHS4	retrotransposon hot spot protein 4 (RHS4), putative	1.48774
Q383E1;P69103	Tb11.01.3170		receptor for activated C kinase 1	1.4873
Q38C20	Tb927.10.2240		RNA binding protein	1.4848	Previous IDs: TRYP_x-70a06.p2kb545_749;Tb10.70.5500
B5LEK4;B5LEL2;B3GVR7;B3GVQ8;B3GVP7;B3GVN9;G1CRP2;B5LEJ5;Q8I8G5;Q8I8G4			ESAG6 type 13 (Fragment)	1.47962
Q387E3	Tb927.11.1070	gat3	glycosomal transporter (GAT3), putative	1.47805	Previous IDs: Tb11.03.0030;Tb11.03.0030:mRNA;Tb11.03.0030:pep
Q38CI6	Tb11.v5.0414;Tb927.10.540	SUB2	ATP-dependent DEAD/H RNA helicase, putative;ATP-dependent RNA helicase SUB2, putative	1.47437	Previous IDs: TRYP_x-70a06.p2kb545_1067;Tb10.70.7730
Q580K6	Tb927.11.6140;Tb927.3.4360		40S ribosomal protein S15A, putative	1.45933	Previous IDs: Tb03.26J7.620;Tb11.02.4000;Tb11.02.4000:mRNA;Tb11.02.4000:pep;Tb11.212.0060
Q57W41	Tb927.5.960		Uncharacterized protein	1.43371
Q582B4	Tb927.5.2530	NAT10	RNA cytidine acetyltransferase	1.42642	Previous IDs: Tb05.3C6.740
Q38CY8	Tb927.9.15110;Tb927.9.15170	L5	60S ribosomal protein L5, putative	1.42076	Previous IDs: Tb09.244.2730;Tb09.244.2740;Tb09.244.2730:mRNA;Tb09.244.2730:pep;Tb09.244.2740:mRNA;Tb09.244.2740:pep;Tb927.9.15150;Tb927.9.15150:mRNA;Tb927.9.15150:pep;chr9contig244a01.tmp0273;chr9contig244a01.tmp0274
Q38AV5;Q37683	Tb10.70.0280	HSP60	chaperonin HSP60, mitochondrial precursor	1.41478
Q38BY1	Tb10.70.5020		Uncharacterized protein	1.41392
Q587H4	Tb927.2.2770		hypothetical protein, conserved	1.41157
Q388W4	Tb927.10.12820		hypothetical protein, conserved	1.40775	Previous IDs: Tb10.389.0720
Q389E6	Tb927.10.11960	PNUTS	Serine/threonine-protein phosphatase 1 regulatory subunit, putative	1.39075	Previous IDs: Tb10.389.1820
Q580N5	Tb427.03.4070		hypothetical protein, conserved	1.38703	Previous IDs: Tb427tmp.26J7.120;current=false
Q388F3	Tb11.v5.0420;Tb927.10.14490		hypothetical protein, conserved	1.3822	Previous IDs: TRYP_x-61h03.q2kb185_337;Tb10.61.2220
Q385K8	Tb927.11.5600	ATOM14	Archaic Translocase of outer membrane 14 kDa subunit	1.36511	Previous IDs: Tb11.02.3310;Tb11.02.3310:mRNA;Tb11.02.3310:pep;Tb11.212.0750
Q57XN5	Tb927.7.2390	TAC102	Tripartite attachment complex protein 102	1.36462	Previous IDs: Tb07.22O10.380
Q57ZC1	Tb427.03.1900		hypothetical protein, conserved	1.36007	Previous IDs: Tb427tmp.30P12.690;current=false

## Sheet: SuppFile1c_WTNoYFPvNonR-TALE
UniProt ID	TriTryp ID	NAME	DESCRIPTION	-Log Student's T-test p-value WT_NonR-TALE	Previous ID(s)
Q38CD0;Q587D5	Tb10.70.7010		60S ribosomal protein L9, putative	4.55373
Q38C01	Tb927.10.2440	MCA4	Metacaspase-4	4.3579	Previous IDs: Tb10.70.5250;embl.368
Q38DP2	Tb09.211.2630		60S ribosomal protein L23, putative	4.216
Q38BI9;P49153;Q38BI8	Tb10.70.3170		60S ribosomal protein L30	4.18462
Q38AW9	Tb10.100.0110		60S ribosomal protein L37a, putative	4.05556
Q386A6	Tb11.02.1566		Variant surface glycoprotein (VSG)-related, putative	3.85026
Q387J6	Tb927.11.550	SCD6	Suppressor of clathrin deficiency 6, putative	3.46873	Previous IDs: Tb11.03.0530;Tb11.03.0530:mRNA;Tb11.03.0530:pep
Q57U36	Tb927.7.180		Trypanosomal VSG domain containing protein, putative	3.31022
Q38A76	Tb927.10.8980		hypothetical protein, conserved	3.30423	Previous IDs: TRYPtp6k15-3d06.p1c_211;Tb10.6k15.1450
Q57ZH2;P41165;Q57ZH1	Tb927.7.5170		60S ribosomal protein L23a	3.22484
Q385E9	Tb927.11.6180;Tb927.11.6200		60S ribosomal protein L28, putative	3.16512	Previous IDs: Tb11.02.4050;Tb11.02.4070;Tb11.02.4050:mRNA;Tb11.02.4050:pep;Tb11.02.4070:mRNA;Tb11.02.4070:pep
Q382W0	Tb927.11.12210		Domain of unknown function (DUF4586), putative	3.14341	Previous IDs: Tb11.01.4030;Tb11.01.4030:mRNA;Tb11.01.4030:pep
Q38D34	Tb927.9.14220	MCA5	metacaspase 5, putative	3.13168	Previous IDs: Tb09.211.4760;Tb09.211.4760:mRNA;Tb09.211.4760:pep;chr9contig211.tmp0524c;embl.369
Q385T6	Tb927.10.14580;Tb927.11.4820		60S ribosomal protein L17, putative	3.06007	Previous IDs: TRYP_x-61h03.q2kb185_314;Tb11.02.2430;Tb10.61.2090;Tb11.02.2430:mRNA;Tb11.02.2430:pep
Q38BK1	Tb927.10.3990	DHH1	DHH1	2.9517	Previous IDs: TRYP_x-70a06.p2kb545_441;Tb10.70.3290
Q38AL4	Tb927.10.7500	NOP1	fibrillarin	2.94593	Previous IDs: TRYPtp6k15-3d06.p1c_454;Tb10.6k15.3160;embl.30
Q586C2	Tb927.10.15120;Tb927.2.5910		40S ribosomal protein S13, putative	2.87315	Previous IDs: TRYP_x-61h03.q2kb185_209;Tb10.61.1390
Q38DU1	Tb09.211.2160		hypothetical protein	2.83828
Q384J9	Tb927.11.8200		ribosomal protein S26, putative	2.78995	Previous IDs: 237.t00945;Tb11.01.0355;Tb11.01.0355:mRNA;Tb11.01.0355:pep
Q38A35	Tb927.10.9400	SF1	splicing factor 1	2.75235	Previous IDs: TRYPtp6k15-3d06.p1c_142;Tb10.6k15.1000
Q38D98	Tb927.9.13240		hypothetical protein, conserved	2.74738	Previous IDs: Tb09.211.4100;Tb09.211.4100:mRNA;Tb09.211.4100:pep;chr9contig211.tmp0456c
Q38FV6	Tb927.9.2020		60S ribosomal protein L38, putative	2.54548	Previous IDs: 229.t01444;Tb09.160.0815;Tb09.160.0815:mRNA;Tb09.160.0815:pep
Q580D8;Q4FKD4	Tb927.4.1100		Ribosomal protein L21E (60S), putative	2.51617
Q383B1	Tb927.11.11690	VAB	Vacuolar proton pump subunit B, putative	2.50443	Previous IDs: Tb11.01.3560;Tb11.01.3560:mRNA;Tb11.01.3560:pep
Q388E0;Q388C9	Tb10.61.2040		Fibrillarin, putative	2.4585
Q586S4	Tb927.2.4810	CMF5	Component of motile flagella 5	2.45315
Q57WA5	Tb427.03.3690		flagellar radial spoke protein-like, putative	2.31968	Previous IDs: Tb427tmp.28C22.890;current=false
Q580Z5	Tb927.8.3750	NOP56	nucleolar protein 56	2.22618	Previous IDs: Tb08.10J17.600
Q867G5;Q387X7	Tb10.61.1090	H3V	Histone H3 variant	2.16797
Q384N3	Tb11.02.5725		hypothetical protein	2.15631
Q38F38	Tb927.9.5150	SNU13	13 kDa ribonucleoprotein-associated protein, putative	2.1333	Previous IDs: Tb09.160.3670;Tb09.160.3670:mRNA;Tb09.160.3670:pep;chr9contig160.tmp0286
Q383V7	Tb927.11.9720		40S ribosomal protein S27, putative	2.0722	Previous IDs: 237.t00934;Tb11.01.1475;Tb11.01.1475:mRNA;Tb11.01.1475:pep
Q386I9	Tb927.11.3220	mca1	metacaspase	2.06155	Previous IDs: Tb11.02.0730;Tb11.02.0730:mRNA;Tb11.02.0730:pep
Q580D6	Tb927.4.1080	VAA	V-type ATPase, A subunit, putative	2.05001	Previous IDs: Tb04.5E12.370
Q38C79	Tb10.70.6300		Dual specificity protein phosphatase, putative	2.03787
Q384P4	Tb927.11.7740		dynein light chain, putative	2.03735	Previous IDs: Tb11.02.5620;Tb11.02.5620:mRNA;Tb11.02.5620:pep
Q57UT0	Tb927.4.450		Coatomer subunit alpha	1.99681
B5LEM2			ESAG5 type 11 (Fragment)	1.96319
Q38FD9;Q38FE4	Tb09.160.2550		40S ribosomal protein S7	1.919
Q57W56	Tb11.01.7960		60S ribosomal protein L2, putative	1.87466
Q57Z31	Tb927.5.4170		Histone H4	1.8304
Q38BR9	Tb927.10.3280		60S ribosomal proteins L38, putative	1.82353	Previous IDs: 233.t00829;Tb10.70.4155
Q38A04	Tb10.6k15.0620		RNA-editing-associated protein 1	1.77103
Q385P5	Tb927.11.5230		hypothetical protein, conserved	1.77014	Previous IDs: Tb11.02.2890;Tb11.02.2890:mRNA;Tb11.02.2890:pep;Tb11.212.1190
Q586Q3	Tb927.2.4510	CRK9	cdc2-related kinase 9	1.74923	NA
Q57WL0	Tb427.08.8200		hypothetical protein, conserved	1.74371	Previous IDs: Tb427tmp.28A12.220;current=false
Q38DX4	Tb09.211.1800		hypothetical protein, conserved	1.73918
Q38CW9;Q38CL1	Tb09.244.2590		60S ribosomal protein L32	1.65482
Q4FKG9;P19800	Tb11.0290		40S ribosomal protein S14	1.65222
Q382Z8	Tb927.11.11820;Tb927.11.11830		40S ribosomal protein S17, putative	1.64954	Previous IDs: 237.t00946;237.t00947;Tb11.01.3675;Tb11.01.3675:mRNA;Tb11.01.3675:pep;Tb11.01.3676;Tb11.01.3676:mRNA;Tb11.01.3676:pep
O15648;D6XDN4	Tb927.3.3270	PFK	ATP-dependent 6-phosphofructokinase, glycosomal	1.63183	Previous IDs: Tb03.3K10.320
Q38DF6	Tb927.9.12510	DED1	ATP-dependent DEAD/H RNA helicase, putative	1.61864	Previous IDs: Tb09.211.3510;Tb09.211.3510:mRNA;Tb09.211.3510:pep;chr9contig211.tmp0394
D7SGA2;Q57UU9;Q57UU8;Q57UU7;Q57UU6;Q57UU5	Tb927.2.340		Retrotransposon hot spot (RHS) protein, putative	1.60741
Q381D9	Tb927.11.16470		SUMO-interacting motif-containing protein	1.57676	Previous IDs: Tb11.01.8190;Tb11.01.8190:mRNA;Tb11.01.8190:pep
Q4GYV5	TB927.1.2670		Axoneme central apparatus protein, putative importin alpha-1 subunit, putative	1.56029
Q57YU1;P23734;Q584K2;P23733	Tb927.8.7390		Serine/threonine-protein phosphatase	1.53636
Q38CD1	Tb927.10.1080;Tb927.10.1090	RPS23	40S ribosomal protein S23, putative	1.50313	Previous IDs: TRYP_x-70a06.p2kb545_970;TRYP_x-70a06.p2kb545_971;Tb10.70.7020;Tb10.70.7030
Q57U86	Tb927.5.3800		Glutamine hydrolysing (Not ammonia-dependent) carbomoyl phosphate synthase, putative	1.47048
Q57YA3	Tb427.07.2820;Tb427.07.2830;Tb427.07.2840;Tb427.07.2850;Tb427.07.2860;Tb427.07.2870;Tb427.07.2880;Tb427.07.2890;Tb427.07.2900;Tb427.07.2910;Tb427.07.2920;Tb427.07.2930;Tb427.07.2940		histone H2A, putative	1.42565	Previous IDs: Tb427tmp.13M20.510;Tb427tmp.13M20.520;Tb427tmp.13M20.530;Tb427tmp.13M20.540;Tb427tmp.13M20.550;Tb427tmp.13M20.560;Tb427tmp.13M20.570;Tb427tmp.13M20.580;Tb427tmp.13M20.590;Tb427tmp.13M20.600;Tb427tmp.13M20.610;Tb427tmp.13M20.620;Tb427tmp.13M20.630;current=false
Q383S2	Tb927.11.10070	BDF3	Bromodomain factor 3, putative	1.3664	Previous IDs: Tb11.01.1830;Tb11.01.1830:mRNA;Tb11.01.1830:pep
Q389T1;Q389S5;Q389S0	Tb10.406.0330	H2B	Histone H2B	1.31819

## Sheet: SuppFile1d_NonR-TALEvTelR-TALE
UniProt ID	TriTryp ID	NAME	DESCRIPTION	-Log Student's T-test p-value NO-REPEAT-TALE_TEL-TALE	Previous ID(s)
Q57ZN9	Tb927.5.1700	RPA2	replication Factor A 28 kDa subunit, putative	6.12883	Previous IDs: Tb05.1P6.900
Q38E94;P12432;P12433	Tb09.211.0620		actin A	5.89739
Q57Z72	Tb927.5.3210	SUMO	small ubiquitin-related modifier	5.21752	Previous IDs: Tb05.27M3.260
Q38C20	Tb927.10.2240		RNA binding protein	5.13255	Previous IDs: TRYP_x-70a06.p2kb545_749;Tb10.70.5500
Q57XY9	Tb927.3.1560	TIF2	TRF-Interacting Factor 2	5.06796	Previous IDs: Tb03.1J15.80
Q585Y5	Tb927.6.3870	SGN1	RNA-binding protein, putative	4.89831
Q38DN0	Tb927.9.11600	GIM5B	glycosomal membrane protein	4.8663	Previous IDs: Tb09.211.2740;Tb09.211.2740:mRNA;Tb09.211.2740:pep;chr9contig211.tmp0313
Q383X6	Tb927.11.9530	14-3-3-I	14-3-3 protein 1	4.83578	Previous IDs: Tb11.01.1290;Tb11.01.1290:mRNA;Tb11.01.1290:pep
Q38FD7;Q38FE2	Tb09.v1.0150		hypothetical protein, conserved	4.79604
Q388B3	Tb927.10.14930	ZC3H39	Zinc finger CCCH domain-containing protein 39	4.71837	Previous IDs: TRYP_x-61h03.q2kb185_255;Tb10.61.1690
Q386V3	Tb927.11.2050;Tb927.11.2060		60S acidic ribosomal protein P0, putative	4.68149	Previous IDs: Tb11.46.0001;Tb11.46.0002;Tb11.46.0001:mRNA;Tb11.46.0001:pep;Tb11.46.0002:mRNA;Tb11.46.0002:pep
Q38CX3	Tb09.244.2630		40S ribosomal protein S6, putative	4.64134
Q381S0	Tb927.11.15150		1-acyl-sn-glycerol-3-phosphate acyltransferase, putative	4.53686	Previous IDs: Tb11.01.6800;Tb11.01.6800:mRNA;Tb11.01.6800:pep
Q580R3	Tb427.03.5620		hypothetical protein, conserved	4.45654	Previous IDs: Tb427tmp.5L5.860;current=false
Q57Z31	Tb927.5.4170		histone H4, putative	4.45286
Q38BN5	Tb927.10.3640	NP	nuclear transmembrane protein, putative	4.39326	Previous IDs: TRYP_x-70a06.p2kb545_501;Tb10.70.3750
Q38B66;Q38B67	Tb10.70.1670		40S ribosomal protein S10, putative	4.33035
Q381B0	Tb11.01.8510	TCP-1-alpha	T-complex protein 1, alpha subunit, putative	4.30608
O15883;Q38DN9	Tb09.211.2650	RPL27A	60S ribosomal protein L28, 60S ribosomal protein L27a, 60S ribosomal protein L29	4.28085
Q383E1;P69103	Tb11.01.3170		receptor for activated C kinase 1	4.27877
Q389Z6	Tb927.10.9800		60S ribosomal protein L22	4.26131	Previous IDs: TRYPtp6k15-3d06.p1c_76;Tb10.6k15.0510
Q585J5	Tb427.04.3550;Tb427.05.1610		60S ribosomal protein L13a, putative	4.21308	Previous IDs: Tb427tmp.26G5.360;Tb427tmp.30H13.890;current=false
Q389T1;Q389S5;Q389S0	Tb10.406.0330	H2B	histone H2B, putative	4.19901
Q583T1;P55842;Q383F5	Tb927.6.720		40S ribosomal protein L14, putative	4.16721
Q383U2	Tb927.11.9870	TelAP1	Telomere-associated protein 1	4.14291	Previous IDs: Tb11.01.1630;Tb11.01.1630:mRNA;Tb11.01.1630:pep
Q582T6	Tb427.03.2230		succinyl-CoA synthetase alpha subunit, putative	4.13186	Previous IDs: Tb427tmp.48O8.710;current=false
Q389E9	Tb927.10.11930		beta-D-hydroxybutyrate dehydrogenase	4.1238	Previous IDs: Tb10.389.1850
Q57YF6	Tb927.8.750	NOPP44/46-2	nucleolar RNA-binding protein, putative	4.10957	Previous IDs: Tb08.12O16.320
Q57W25;B9VVJ6;Q57W24;B9VVJ7	Tb927.5.800	CK1.2	casein kinase I, isoform 2	4.04489
Q9NDH8;Q38BV6	Tb10.70.4740		enolase	4.0252
Q388B1	Tb927.10.14950	ZC3H40	Zinc finger CCCH domain-containing protein 40	4.01603	Previous IDs: TRYP_x-61h03.q2kb185_245;Tb10.61.1630
Q57US8	Tb427.04.470		snoRNP protein GAR1, putative	4.00127	Previous IDs: Tb427tmp.5D20.620;current=false
Q586Z9	Tb927.6.4330		telomere-associated protein	3.98472
Q57YA3	Tb427.07.2820;Tb427.07.2830;Tb427.07.2840;Tb427.07.2850;Tb427.07.2860;Tb427.07.2870;Tb427.07.2880;Tb427.07.2890;Tb427.07.2900;Tb427.07.2910;Tb427.07.2920;Tb427.07.2930;Tb427.07.2940		histone H2A, putative	3.9603	Previous IDs: Tb427tmp.13M20.510;Tb427tmp.13M20.520;Tb427tmp.13M20.530;Tb427tmp.13M20.540;Tb427tmp.13M20.550;Tb427tmp.13M20.560;Tb427tmp.13M20.570;Tb427tmp.13M20.580;Tb427tmp.13M20.590;Tb427tmp.13M20.600;Tb427tmp.13M20.610;Tb427tmp.13M20.620;Tb427tmp.13M20.630;current=false
Q38DT1	Tb09.211.2260	KKT3	kinetoplastid kinetochore protein 3	3.92048
Q38DF6	Tb927.9.12510	DED1	ATP-dependent DEAD/H RNA helicase, putative	3.90972	Previous IDs: Tb09.211.3510;Tb09.211.3510:mRNA;Tb09.211.3510:pep;chr9contig211.tmp0394
Q580H2	Tb927.8.1510	DBP2B	ATP-dependent RNA helicase DBP2B, putative	3.90499	Previous IDs: Tb08.29O9.160
Q384Y7	Tb927.11.6830		Domain of unknown function(DUF2779), putative	3.89907	Previous IDs: Tb11.02.4660;Tb11.02.4660:mRNA;Tb11.02.4660:pep
Q38CJ9	Tb927.10.390		DUF2407 ubiquitin-like domain containing protein, putative	3.86992	Previous IDs: TRYP_x-70a06.p2kb545_1092;Tb10.70.7950
Q384B5	Tb927.11.9130	RPA1	Replication factor A protein 1	3.85831	Previous IDs: Tb11.01.0870;Tb11.01.0870:mRNA;Tb11.01.0870:pep
Q9NJP9;Q38DF2;Q38DE9;Q38DF3;Q38DF0	Tb09.211.3550	glk1	glycerol kinase, glycosomal	3.84856
Q388G3	Tb927.10.14390	POB3	FACT complex subunit POB3	3.82687	Previous IDs: TRYP_x-61h03.q2kb185_364;Tb10.61.2370
Q57WF6	Tb927.7.3410	Centrin4	centrin-4	3.8172	Previous IDs: Tb07.28B13.660
Q585G9	Tb927.2.1080	RHS5	retrotransposon hot spot protein 5 (RHS5), putative	3.78097
Q386I1	Tb927.11.3300	SAS-4	Spindle assembly abnormal 4	3.76002	Previous IDs: Tb11.02.0810;Tb11.02.0810:mRNA;Tb11.02.0810:pep
Q9N9D0;Q38DN1	Tb09.211.2730	gim5A	Gim5A protein, glycosomal membrane protein	3.74952
Q582M3	Tb427.07.6360	h2aZ	histone H2A variant	3.73244	Previous IDs: Tb427tmp.33N13.260;current=false
Q583S0	Tb927.6.2640	KAP60	importin alpha subunit, putative	3.72841	Previous IDs: Tb06.5F5.40
Q57UP8	Tb927.7.4180	ELO1	Fatty acid elongase	3.72733
Q382U0	Tb927.11.12410	KKT10	kinetoplastid kinetochore protein 10	3.72065	Previous IDs: Tb11.01.4230;Tb11.01.4230:mRNA;Tb11.01.4230:pep
Q38F93	Tb09.160.3090	HSP70.a	heat shock protein, putative	3.71951
Q382F9;Q26734	Tb11.01.5350		profilin	3.70956
Q584M6;Q8IFJ1	Tb927.2.510	RHS4	retrotransposon hot spot protein 4 (RHS4), putative	3.70878
Q38AV5;Q37683	Tb10.70.0280	HSP60	chaperonin HSP60, mitochondrial precursor	3.70435
Q582N2;P49669	Tb927.3.5050		60S ribosomal protein L4	3.70017
Q57XD5	Tb927.8.2540	SCP2	3-ketoacyl-CoA thiolase	3.68352	Previous IDs: Tb08.26A17.500
Q38BZ3	Tb927.10.2520	ppl2	PrimPol-like protein 2	3.68016	Previous IDs: TRYP_x-70a06.p2kb545_702;Tb10.70.5160
Q57V54;Q57V55	Tb927.3.3320		60S ribosomal protein L13, putative	3.67112
Q867U7;Q384T0	Tb11.02.5250	H2BV	Histone H2B variant V	3.65924
Q38BS1	Tb10.70.4200	LACS5	Long-chain-fatty-acid--CoA ligase 5 (EC 6.2.1.3) (Long-chain acyl-CoA synthetase 5) (LACS 5)	3.65161
Q384B1;A4URT2	Tb11.01.0910		DNA topoisomerase III, putative	3.61507
Q585V4	Tb927.2.5160	J2	Chaperone protein DnaJ 2	3.60559
Q38AE1;P12865	Tb10.6k15.2290		Protein disulfide isomerase	3.57184
Q38D64;Q38D65	Tb09.211.4470		ADP-ribosylation factor, putative	3.53007
Q586J9	Tb927.2.2190	HDAC3	histone deacetylase 3	3.52997
Q57VM1	Tb427.08.1330;Tb427.08.1340		60S ribosomal protein L7a, putative	3.52693	Previous IDs: Tb427tmp.29O4.580;Tb427tmp.29O4.590;current=false
Q584G9	Tb427.04.2180		60S ribosomal protein L35a, putative	3.52244	Previous IDs: Tb427tmp.1H19.150;current=false
Q57WD3	Tb927.3.3970		Cell growth-regulating nucleolar protein, putative	3.51993	Previous IDs: Tb03.28C22.230
D6XMQ7	Tb927.8.890	Rab1A	Ras-related protein Rab1A	3.51725	Previous IDs: Tb08.12O16.530
Q6Q832;Q582Q6	Tb927.3.4750		Aminopeptidase M1, putative	3.50406
Q382C8	Tb927.11.14090	DRBD18	Double RNA binding domain protein 18	3.49872	Previous IDs: Tb11.01.5680;Tb11.01.5680:mRNA;Tb11.01.5680:pep
Q386P5	Tb927.11.2650	TRAP1	heat shock protein 84, putative	3.48886	Previous IDs: Tb11.02.0250;Tb11.02.0250:mRNA;Tb11.02.0250:pep
Q38FF6	Tb927.9.3770		hypothetical protein, conserved	3.48853	Previous IDs: Tb09.160.2370;Tb09.160.2370:mRNA;Tb09.160.2370:pep;chr9contig160.tmp0203
Q57ZI7	Tb427.07.5000;Tb427.07.5020		60S ribosomal protein L19, putative	3.48715	Previous IDs: Tb427tmp.27E10.170;Tb427tmp.27E10.210;current=false
Q4FKA8	Tb11.1380;Tb927.11.1840	CAP46	Cytoskeleton-associated protein 46 kDa	3.47844	Previous IDs: Tb11.39.0004;Tb11.39.0004:mRNA;Tb11.39.0004:pep
Q584M8	Tb927.2.450	RHS4	retrotransposon hot spot protein 4 (RHS4), putative	3.47144
Q385W9	Tb927.11.4480	RSP4/6	Flagellar radial spoke protein 4/6	3.47021	Previous IDs: TRYP_xi-1013a02.q1k_47;Tb11.02.2060;Tb11.02.2060:mRNA;Tb11.02.2060:pep
Q57XJ5	Tb927.3.3450	ARL3A	ADP-ribosylation factor-like protein 3, putative	3.44724	Previous IDs: Tb03.25B21.123
Q583I9	Tb427.04.2040	ALBA3	hypothetical protein, conserved	3.43105	Previous IDs: Tb427tmp.29M18.710;current=false
Q385L3	Tb11.02.3250	POLQ	DNA polymerase theta	3.42427
Q388W1	Tb927.10.12850	TRF	ttaggg binding factor	3.42308	Previous IDs: Tb10.389.0680
Q581B7	Tb427.08.3970		oxidoreductase, putative	3.41907	Previous IDs: Tb427tmp.10J17.220;current=false
Q385B8;Q385B9	Tb11.02.4360		40S ribosomal protein S21, putative	3.40969
Q57YA8;Q57YB2	Tb927.7.2980		Uncharacterized protein	3.40854
Q387Q3	Tb10.61.0150		Inosine-5-monophosphate dehydrogenase	3.38822
P86938;P86937	Tb927.11.13640	JBP1	J-binding protein	3.37039	Previous IDs: Tb11.01.5220;Tb11.01.5220:mRNA;Tb11.01.5220:pep
Q38EU9	Tb927.9.6290	AK1	arginine kinase	3.36665	Previous IDs: Tb09.160.4590;Tb09.160.4590:mRNA;Tb09.160.4590:pep;chr9contig160.tmp0345
Q381J6	Tb927.11.15880;Tb927.11.15900		60S ribosomal protein L27, putative	3.34867	Previous IDs: Tb11.01.7535;Tb11.01.7545;Tb11.01.7535:mRNA;Tb11.01.7535:pep;Tb11.01.7545:mRNA;Tb11.01.7545:pep
Q388D3	Tb927.10.14600;Tb927.10.14710	RPS2	40S ribosomal protein S2, putative	3.33239	Previous IDs: TRYP_x-61h03.q2kb185_295;TRYP_x-61h03.q2kb185_310;Tb10.61.1960;Tb10.61.2070
Q57YL2	Tb927.8.6110	HMGS	3-hydroxy-3-methylglutaryl-CoA synthase, putative	3.32751	Previous IDs: Tb08.11J15.640
Q57UB5	Tb427.05.3510	SMC3	structural maintenance of chromosome 3 , putative	3.31526	Previous IDs: Tb427tmp.6E7.170;current=false
Q585Y2	Tb927.6.3840		reticulon domain protein	3.31225	Previous IDs: Tb06.4F7.620
Q581X8	Tb927.8.2040		Domain of unknown function (DUF1767), putative	3.29777	Previous IDs: Tb08.26N11.520
Q587H4	Tb927.2.2770		hypothetical protein, conserved	3.2818
Q383E9;P20030	Tb11.01.3080		Heat shock protein 70, putative	3.2817
Q382M7;Q382L7	Tb11.01.4660		Elongation factor 1 gamma, putative	3.25547
Q385E6	Tb927.11.6230		protein transport protein SEC61 subunit alpha, putative	3.25539	Previous IDs: Tb11.02.4100;Tb11.02.4100:mRNA;Tb11.02.4100:pep
Q381H3	Tb927.11.16130	NDPK	nucleoside diphosphate kinase	3.24885	Previous IDs: Tb11.01.7800;Tb11.01.7800:mRNA;Tb11.01.7800:pep
Q385M4	Tb927.11.5440		NADP-dependent malic enzyme, cytosolic	3.22829	Previous IDs: Tb11.02.3120;Tb11.02.3120:mRNA;Tb11.02.3120:pep;Tb11.212.0950
Q38B00	Tb11.v5.0199;Tb927.10.6060	UMSBP2	universal minicircle sequence binding protein 2;universal minicircle sequence binding protein, putative	3.206	Previous IDs: TRYP_x-70a06.p2kb545_119;Tb10.70.0820
Q38DY5	Tb927.9.10230	P23	Co-chaperone protein P23	3.20551	Previous IDs: Tb09.211.1690;Tb09.211.1690:mRNA;Tb09.211.1690:pep;chr9contig211.tmp0200c
Q38DK9	Tb927.9.11850	SMC1	structural maintenance of chromosome 1, putative	3.20325	Previous IDs: Tb09.211.2970;Tb09.211.2970:mRNA;Tb09.211.2970:pep;chr9contig211.tmp0337
Q382C7	Tb927.11.14100	DRBD4	Double RNA-binding domain containing protein 4	3.18606	Previous IDs: Tb11.01.5690;Tb11.01.5690:mRNA;Tb11.01.5690:pep
Q57ZQ1	Tb427.05.1820		60S acidic ribosomal protein, putative	3.17525	Previous IDs: Tb427tmp.1P6.710;current=false
Q381S2	Tb927.11.15130	J7	DnaJ homolog, putative	3.16994	Previous IDs: Tb11.01.6780;Tb11.01.6780:mRNA;Tb11.01.6780:pep
Q867G5;Q387X7	Tb10.61.1090	H3V	histone H3 variant V	3.16134
Q38DK0	Tb927.9.11940	RPA3	replication factor A protein 3, putative	3.11461	Previous IDs: Tb09.211.3050;Tb09.211.3050:mRNA;Tb09.211.3050:pep;chr9contig211.tmp0346
Q57VW1	Tb927.5.520		Stomatin-like protein, putative	3.1094
Q584T9	Tb927.6.2170	MGE1	co-chaperone GrpE, putative	3.10641	Previous IDs: Tb06.4M18.480
Q381R2	Tb927.11.15230		cytosolic coat protein, putative	3.10575	Previous IDs: Tb11.01.6880;Tb11.01.6880:mRNA;Tb11.01.6880:pep
Q382C4	Tb927.10.3840;Tb927.11.14130		60S ribosomal protein L18a, putative;ribosomal protein L18, putative	3.10572	Previous IDs: TRYP_x-70a06.p2kb545_470;Tb11.01.5720;Tb10.70.3510;Tb11.01.5720:mRNA;Tb11.01.5720:pep
Q38BE4	Tb927.10.4560;Tb927.10.4570		elongation factor 2	3.10357	Previous IDs: TRYP_x-70a06.p2kb545_355;TRYP_x-70a06.p2kb545_357;Tb10.70.2650;Tb10.70.2660
Q383R3	Tb927.11.10160		60S ribosomal protein L22, putative	3.10206	Previous IDs: Tb11.01.1920;Tb11.01.1920:mRNA;Tb11.01.1920:pep
Q38B01	Tb927.10.6050	CHC	clathrin heavy chain	3.06436	Previous IDs: TRYP_x-70a06.p2kb545_120;Tb10.70.0830;embl.373
Q386I7	Tb927.11.3240	TCP-1-zeta	T-complex protein 1, zeta subunit, putative	3.06397	Previous IDs: Tb11.02.0750;Tb11.02.0750:mRNA;Tb11.02.0750:pep
Q38E79	Tb927.9.9100		hypothetical protein, conserved	3.02511	Previous IDs: 229.t01421;Tb09.211.0775;Tb09.211.0775:mRNA;Tb09.211.0775:pep
Q57WF2	Tb927.7.3370	IFT74	Intraflagellar transport protein 74, putative	3.01971	Previous IDs: Tb07.28B13.700
Q57V37;Q57V35	Tb927.7.1730		60S ribosomal protein L7, putative	3.00612
Q4FKN8;Q4FKN7	Tb10.v4.0052		Microtubule-associated protein 2 (Fragment)	2.99779
Q383E5;A0A0U2KFL3	Tb11.01.3110		Heat shock protein 70	2.99435
Q382Z8	Tb927.11.11820;Tb927.11.11830		40S ribosomal protein S17, putative	2.98902	Previous IDs: 237.t00946;237.t00947;Tb11.01.3675;Tb11.01.3675:mRNA;Tb11.01.3675:pep;Tb11.01.3676;Tb11.01.3676:mRNA;Tb11.01.3676:pep
Q582R3	Tb927.3.4720	DLP1	dynamin-like protein 1	2.98602	Previous IDs: Tb03.48K5.290
Q387E8	Tb927.11.1020		ribokinase, putative	2.98099	Previous IDs: Tb11.03.0090;Tb11.03.0090:mRNA;Tb11.03.0090:pep
Q57YR7	Tb927.8.7100		Acetyl-CoA carboxylase, putative	2.96674
Q386Y4	Tb927.11.1700		hypothetical protein, conserved	2.95611	Previous IDs: Tb11.55.0010;Tb11.55.0010:mRNA;Tb11.55.0010:pep
Q38BK6;Q38BK7	Tb10.70.3360		40S ribosomal protein S3a	2.95176
Q4GYY5	Tb427.01.2340;Tb427.01.2360;Tb427.01.2380;Tb427.01.2400		alpha tubulin	2.94079
Q4GYX7	TB927.1.2430	H3	histone H3, putative	2.93796
Q383L0	Tb927.11.10690		hypothetical protein, conserved	2.9362	Previous IDs: Tb11.01.2460;Tb11.01.2460:mRNA;Tb11.01.2460:pep
Q6ZXT2		aqp3	Aquaglyceroporin 3	2.92451
Q57V53	Tb927.3.3330	HSP20	heat shock protein 20, putative	2.9185	Previous IDs: Tb03.3K10.400
Q389P1	Tb11.v5.0543;Tb927.10.10890;Tb927.10.10900;Tb927.10.10920;Tb927.10.10940;Tb927.10.10950;Tb927.10.10960		Heat shock protein 83, putative;heat shock protein, putative	2.91704	Previous IDs: Tb10.329.0050;Tb10.329.0060;Tb10.329.0080;Tb10.329.0100;Tb10.329.0110;Tb10.329.0120
Q57WH0	Tb927.7.3550	WCB	cytoskeleton associated protein, putative	2.91666	Previous IDs: Tb07.28B13.500
Q388M1;Q57XN2	Tb927.7.2420	GSK3A	glycogen synthase kinase-3 alpha, putative	2.88794	Previous IDs: Tb07.22O10.450
Q57TY3	Tb927.7.7460	Z41AP	ZC3H41-associated protein	2.88639	Previous IDs: Tb07.30D13.320
P26331			Variant surface glycoprotein MITAT 1.1	2.88338
Q57WZ3	Tb427.03.1120	rtb2	GTP-binding nuclear protein rtb2, putative	2.87775	Previous IDs: Tb427tmp.27F10.90;current=false
Q38EX6	Tb927.9.5900	GDH	glutamate dehydrogenase	2.87264	Previous IDs: Tb09.160.4310;Tb09.160.4310:mRNA;Tb09.160.4310:pep;chr9contig160.tmp0326
Q57VB1	Tb927.5.1520	HslU1	ATP-dependent protease ATPase subunit HslU1	2.84737	Previous IDs: Tb05.30H13.690
Q581Q1;Q581Q2	Tb927.4.1800		Ribosomal protein L3, mitochondrial, putative	2.78043
Q57X54	Tb427.05.4500	TbSAR1	ras-like small GTPase, putative	2.77988	Previous IDs: Tb427tmp.26C7.80;current=false
Q57UX1	Tb927.8.4810		Prohibitin	2.76673
Q382K8	Tb927.11.13280	gBP25	Guide RNA binding protein 25	2.74376	Previous IDs: Tb11.01.4860;Tb11.01.4860:mRNA;Tb11.01.4860:pep
Q384S7	Tb927.11.7380	G3PDH	glycerol-3-phosphate dehydrogenase (FAD-dependent), mitochondrial	2.73989	Previous IDs: Tb11.02.5280;Tb11.02.5280:mRNA;Tb11.02.5280:pep
Q386P9	Tb927.11.2610	CAP50	Cytoskeleton-associated protein 50 kDa	2.73082	Previous IDs: Tb11.02.0210;Tb11.02.0210:mRNA;Tb11.02.0210:pep
Q586X9	Tb927.2.3580	TFIIS2-1	transcription elongation factor s-II, putative	2.72021
P50885	Tb427.10.9880;Tb427tmp.02.1840	RPL18;TbL18LP	60S ribosomal protein L18, putative	2.70424	Previous IDs: TRYP_xi-1013a02.q1k_74;TRYPtp6k15-3d06.p1c_64;Tb427tmp.6k15.0410;current=false
Q389R7	Tb10.406.0290		Protein tyrosine phosphatase, putative	2.69115
Q38C42;A0A3G1VTN5	Tb10.70.5820		Phosphotransferase	2.69074
Q57Z55	Tb927.5.3400		Calcium-transporting ATPase	2.68893
Q38CD4	Tb927.10.1060	TCP-1-delta	T-complex protein 1, delta subunit, putative	2.68871	Previous IDs: TRYP_x-70a06.p2kb545_973;Tb10.70.7050
Q387T9	Tb927.10.15750	p197	Tripartite attachment complex protein 197	2.65772	Previous IDs: TRYP_x-61h03.q2kb185_88;TRYP_x-61h03.q2kb185_89;Tb10.61.0550;Tb10.61.0560
Q38F76	Tb927.9.4680	EIF4A1	Eukaryotic initiation factor 4A-1	2.65424	Previous IDs: Tb09.160.3270;Tb09.160.3270:mRNA;Tb09.160.3270:pep;chr9contig160.tmp0259
Q38AJ6	Tb927.10.7680		GTPase activating protein, putative	2.64885	Previous IDs: TRYPtp6k15-3d06.p1c_424;Tb10.6k15.2930
Q4GYY6	Tb427.01.2330;Tb427.01.2350;Tb427.01.2370;Tb427.01.2390		beta tubulin	2.6466
Q581R3	Tb427.04.1680	ZC3H10	hypothetical protein, conserved	2.62718	Previous IDs: Tb427tmp.2L9.1180;current=false
Q388W2	Tb927.10.12840	MCP12	mitochondrial carrier protein	2.60757	Previous IDs: Tb10.389.0690
Q57YL6	Tb427.08.6150;Tb427.08.6160		40S ribosomal protein S8, putative	2.60471	Previous IDs: Tb427tmp.11J15.560;Tb427tmp.11J15.570;current=false
Q585X3	Tb927.6.3740		Heat shock 70 kDa protein, mitochondrial, putative	2.57876
Q38B20	Tb927.10.5840		translation elongation factor 1-beta, putative	2.57394	Previous IDs: TRYP_x-70a06.p2kb545_154;Tb10.70.1100
Q388B7;REV__CON__Q497I4	Tb10.61.1750		Kinesin-like protein	2.5435
Q389I7;Q38EW1	Tb10.26.0370		40S ribosomal protein S3, putative	2.54298
Q38AE5	Tb927.10.8190		T-complex protein 1, theta subunit, putative	2.53763	Previous IDs: TRYPtp6k15-3d06.p1c_341;Tb10.6k15.2330
Q38DT2	Tb09.211.2250		Uncharacterized protein	2.51904
Q385C5	Tb927.11.6440	ENF	Essential Nuclear Factor, 49 kDa	2.51879	Previous IDs: Tb11.02.4300;Tb11.02.4300:mRNA;Tb11.02.4300:pep
Q586Z8	Tb427.06.4320		hypothetical protein, conserved	2.5158	Previous IDs: Tb427tmp.26G9.1010;current=false
Q586V1	Tb927.2.4230		NUP-1 protein, putative	2.51179
Q3S1K6;Q38DS4	Tb927.9.11000	RAB7	ras-related protein RAB7, putative	2.50401	Previous IDs: Tb09.211.2330;Tb09.211.2330:mRNA;Tb09.211.2330:pep;chr9contig211.tmp0269c
Q57YU3	Tb927.8.7410		Calreticulin, putative	2.50288
Q57ZF2	Tb927.3.1590	MRB1590	mitochondrial RNA binding complex 1 subunit	2.48223	Previous IDs: Tb03.30P12.70
Q38AC1	Tb927.10.8430		40S ribosomal protein S12, putative	2.46972	Previous IDs: TRYPtp6k15-3d06.p1c_305;Tb10.6k15.2050
Q38B23	Tb927.10.5810		The ARF-like 2 binding protein BART, putative	2.4673	Previous IDs: TRYP_x-70a06.p2kb545_157;Tb10.70.1130
Q57YK4;Q38D53	Tb927.8.6030		60S ribosomal protein L12, putative	2.46486
Q4GYZ5	Tb927.1.2260	SMP1-2	small myristoylated protein 1-2	2.45861
Q387F2	Tb927.11.980	NUP158	Nucleoporin NUP158	2.45689	Previous IDs: Tb11.03.0140;Tb11.03.0140:mRNA;Tb11.03.0140:pep
P86939;P86934;P86933	Tb10.70.5670		Elongation factor 1-alpha 2	2.45224
Q386Q6	Tb927.11.2540		hypothetical protein, conserved	2.44981	Previous IDs: Tb11.02.0140;Tb11.02.0140:mRNA;Tb11.02.0140:pep
Q587B0	Tb927.6.4440	RBP42	RNA-binding protein 42 (RNA-binding motif protein 42)	2.44874	Previous IDs: Tb06.26G9.840
Q57WY4	Tb927.3.1010	CAP64	Cytoskeleton-associated protein 64 kDa	2.43857	Previous IDs: Tb03.27F10.360
Q583K7	Tb427.04.1860		ribosomal protein S19, putative	2.43842	Previous IDs: Tb427tmp.29M18.160;current=false
Q386G1	Tb927.11.3500		Dpy-30 motif containing protein, putative	2.42505	Previous IDs: Tb11.02.0990;Tb11.02.0990:mRNA;Tb11.02.0990:pep
Q388D4	Tb927.10.14700		hypothetical protein, conserved	2.42194	Previous IDs: TRYP_x-61h03.q2kb185_296;Tb10.61.1970
Q4GZG4	Tb427.01.700	PGKC	phosphoglycerate kinase	2.41543
Q57VE2	Tb427.05.1210		short-chain dehydrogenase, putative	2.40418	Previous IDs: Tb427tmp.30H13.140;current=false
Q57UN6	Tb927.7.4060		Calpain-like cysteine peptidase, putative	2.39509
Q585L9	Tb427.06.1920		hypothetical protein, conserved	2.38513	Previous IDs: Tb427tmp.28P18.1100;current=false
Q388I4	Tb927.10.14180	SEC13	protein transport protein SEC13	2.37893	Previous IDs: TRYP_x-61h03.q2kb185_399;Tb10.61.2630
Q57XC6	Tb927.8.2630	KIN-C	kinesin-C	2.37793	Previous IDs: Tb08.26A17.630
Q586R7;Q26692	Tb927.2.4710		RNA-binding protein, putative	2.37367
Q38BY1	Tb10.70.5020		Uncharacterized protein	2.3733
Q8IFI8	Tb927.1.120	RHS4	retrotransposon hot spot protein 4 (RHS4), putative	2.36709
Q384Q5	Tb927.11.7460;Tb927.11.7510	BiP	luminal binding protein 1 (BiP), putative	2.36305	Previous IDs: Tb11.02.5450;Tb11.02.5500;Tb11.02.5450:mRNA;Tb11.02.5450:pep;Tb11.02.5500:mRNA;Tb11.02.5500:pep
Q57XG1;Q57XG2	Tb927.8.2260		Uncharacterized protein	2.35919
Q57VB7	Tb927.5.1460		Possible lysine decarboxylase, putative	2.35705	Previous IDs: Tb05.30H13.580
Q38E40	Tb09.211.1150		Uncharacterized protein	2.32268
Q57WR6	Tb927.7.1320		10 kDa heat shock protein, putative	2.32084
Q383N6	Tb927.11.10430		dynein regulatory complex protein 9, putative	2.31188	Previous IDs: Tb11.01.2200;Tb11.01.2200:mRNA;Tb11.01.2200:pep
Q38A10	Tb927.10.9650	NUP152	Nucleoporin NUP152	2.30967	Previous IDs: TRYPtp6k15-3d06.p1c_100;Tb10.6k15.0690
Q57XK9	Tb927.7.2650	CAP51V	Cytoskeleton associated protein 51V	2.28887	Previous IDs: Tb07.22O10.860
Q57WB4;Q57WB2;O77404	Tb927.3.3780		Tryparedoxin	2.26202
Q38AC0;Q38AB9;Q09039;Q38AB8;Q06222	Tb10.6k15.2040		Hexose transporter	2.25847
Q38CI6	Tb11.v5.0414;Tb927.10.540	SUB2	ATP-dependent DEAD/H RNA helicase, putative;ATP-dependent RNA helicase SUB2, putative	2.25723	Previous IDs: TRYP_x-70a06.p2kb545_1067;Tb10.70.7730
Q38FS0	Tb09.160.1160		Uncharacterized protein	2.25589
Q57X63	Tb927.7.4470		Uncharacterized protein	2.23488
Q38CZ5	Tb927.9.15050	DRC4	nexin-dynein regulatory complex 4	2.23074	Previous IDs: Tb09.244.2800;Tb09.244.2800:mRNA;Tb09.244.2800:pep;chr9contig244a01.tmp0280
Q38DH8	Tb927.9.12200;Tb927.9.12240		60S ribosomal subunit protein L31, putative	2.22393	Previous IDs: Tb09.211.3270;Tb09.211.3280;Tb09.211.3270:mRNA;Tb09.211.3270:pep;Tb09.211.3280:mRNA;Tb09.211.3280:pep;chr9contig211.tmp0370;chr9contig211.tmp0371
Q38AQ7	Tb927.10.7060	NUP96	Nucleoporin NUP96	2.22077	Previous IDs: TRYPtp6k15-3d06.p1c_529;Tb10.6k15.3670
Q385D2	Tb927.11.6370		leucine-rich repeat protein (LRRP), putative	2.20674	Previous IDs: Tb11.02.4230;Tb11.02.4230:mRNA;Tb11.02.4230:pep
Q38AK7	Tb927.10.7570	PDH-E2	dihydrolipoamide acetyltransferase E2 subunit, putative	2.20169	Previous IDs: TRYPtp6k15-3d06.p1c_444;Tb10.6k15.3080
Q57WF9	Tb927.7.3440	CAP27	Cytoskeleton-associated protein 27 kDa	2.19684	Previous IDs: Tb07.28B13.630
Q388Z2	Tb927.10.12510		P-type H+-ATPase, putative	2.19202	Previous IDs: Tb10.389.1170
Q584M7	Tb927.2.470	RHS4	retrotransposon hot spot protein 4 (RHS4), putative	2.1884
Q385D9	Tb927.11.6300		40S ribosomal protein S5, putative	2.17963	Previous IDs: Tb11.02.4170;Tb11.02.4170:mRNA;Tb11.02.4170:pep
Q386F2	Tb11.v5.1059;Tb927.11.3590;Tb927.11.3600		40S ribosomal protein S4, putative	2.17606	Previous IDs: Tb11.02.1085;Tb11.02.1090;Tb11.02.1085:mRNA;Tb11.02.1085:pep;Tb11.02.1090:mRNA;Tb11.02.1090:pep
Q38EY6	Tb927.9.5690		60S acidic ribosomal protein, putative	2.17396	Previous IDs: Tb09.160.4200;Tb09.160.4200:mRNA;Tb09.160.4200:pep;chr9contig160.tmp0317
Q38EC5	Tb927.9.8070;Tb927.9.8420	QM	QM-like protein, 60S ribosomal protein L10, putative	2.17379	Previous IDs: Tb09.211.0110;Tb09.211.0340;Tb09.211.0110:mRNA;Tb09.211.0110:pep;Tb09.211.0340:mRNA;Tb09.211.0340:pep;chr9contig211.tmp0011c;chr9contig211.tmp0042c
Q38DE8	Tb927.9.12650	UBA1b	ubiquitin-activating enzyme E1, putative	2.17205	Previous IDs: Tb09.211.3610;Tb09.211.3610:mRNA;Tb09.211.3610:pep;chr9contig211.tmp0404
Q386P3	Tb927.11.2670	NUP59	Nucleoporin NUP59	2.17167	Previous IDs: Tb11.02.0270;Tb11.02.0270:mRNA;Tb11.02.0270:pep
Q57WE8	Tb927.7.3330	FAZ10	Flagellar attachment zone protein 10	2.1565	Previous IDs: Tb07.28B13.760
Q57W54	Tb927.5.1090		Threonyl-tRNA synthetase, putative	2.15376
Q382Y3	Tb927.11.11965;Tb927.11.11975;Tb927.11.11980	CAP15	cytoskeleton-associated protein 15;cytoskeleton-associated protein, putative	2.15293	Previous IDs: NCDS.Tb927.11.11965;NTCDS.Tb11.NT.142;Tb11.01.3805;Tb11.01.3805:mRNA;Tb11.01.3805:pep
Q57W41	Tb927.5.960		Uncharacterized protein	2.15278
Q388V0	Tb927.10.12960	RAB5A	Ras-related protein Rab5A	2.14538	Previous IDs: Tb10.389.0550
Q57WZ2	Tb427.03.1110	PIFTA1	flagellar transport protein, putative	2.13008	Previous IDs: Tb427tmp.27F10.120;current=false
Q57Z07	Tb427.05.4420		nucleolar RNA helicase Gu, putative	2.12491	Previous IDs: Tb427tmp.45E22.770;current=false
Q38E83	Tb927.9.9060	LSM12	Lsm12 protein, putative	2.12349	Previous IDs: Tb09.211.0740;Tb09.211.0740:mRNA;Tb09.211.0740:pep;chr9contig211.tmp0091c
P13377;Q6RZY0	Tb427.01.3830	PGI	Glucose-6-phosphate isomerase, glycosomal	2.12295
Q382D5;Q382D7	Tb11.01.5590	NRBD2	nuclear RNA binding domain 2	2.11916
Q581U8	Tb427.04.1330		DNA topoisomerase IB, large subunit	2.1151	Previous IDs: Tb427tmp.2L9.490;current=false
Q38C95	Tb10.70.6570		Uncharacterized protein	2.11387
Q57UL8;Q26678;Q57UL6;Q57X35;P17882	Tb927.8.5460		Flagellar calcium-binding protein TB-44A	2.11285
Q57YZ8	Tb427.08.3150	TCP-1-gamma	T-complex protein 1, gamma subunit, putative	2.11197	Previous IDs: Tb427tmp.28L1.90;current=false
Q583W1	Tb927.4.2840	MC11	microtubule inner protein MC11	2.09952	Previous IDs: Tb04.2H8.1170
Q585H2	Tb927.2.1210		Retrotransposon hot spot (RHS) protein, putative	2.09601
Q38AM2	Tb10.6k15.3250		Succinate--CoA ligase [ADP-forming] subunit beta, mitochondrial	2.09403
Q9N942	Tb927.1.420	RHS5	retrotransposon hot spot protein 5 (RHS5), putative	2.09212
Q388X5;Q383V6	Tb10.389.0910		60S ribosomal protein L34, putative	2.08971
D6XKT6	Tb927.8.1990	mPRX	peroxidoxin	2.0817	Previous IDs: Tb08.26N11.460
Q57Y35	Tb927.4.4310	NUP64	Nucleoporin NUP64	2.07112	Previous IDs: Tb04.1D20.150
Q6Q833		lap	Cytosolic leucyl aminopeptidase	2.06539
Q383K0;Q383I8	Tb11.01.2560		40S ribosomal protein SA	2.0603
Q94774;Q387G2	Tb927.11.880	CYPA	cyclophilin a	2.04361	Previous IDs: Tb11.03.0250;Tb11.03.0250:mRNA;Tb11.03.0250:pep
Q38DU2	Tb09.211.2150		Polyadenylate-binding protein	2.03792
Q386W3	Tb11.46.0011		Uncharacterized protein	2.02743
Q388E8	Tb10.61.2130		ATP-dependent DEAD/H RNA helicase, putative	2.02546
Q57UW3	Tb927.8.4890		Endoplasmic reticulum oxidoreductin, putative	2.02201
Q57U69	Tb927.5.3970		Adenylate kinase, putative	2.01909
Q585W3	Tb927.6.3650		ADP-ribosylation factor, putative	2.01565
Q38C07	Tb927.10.2370	LA	Lupus La protein homolog, putative	2.01185	Previous IDs: TRYP_x-70a06.p2kb545_728;Tb10.70.5360
Q389K1	Tb927.10.11390		60S ribosomal protein L6, putative	2.0099	Previous IDs: Tb10.26.0560
Q38FD9;Q38FE4	Tb09.160.2550		40S ribosomal protein S7	1.99077
Q57Z10	Tb427.05.4390		hypothetical protein, conserved	1.9897	Previous IDs: Tb427tmp.45E22.740;current=false
Q38CF6	Tb927.10.840	FAZ6	Flagellum attachment zone protein 6	1.98405	Previous IDs: TRYP_x-70a06.p2kb545_1007;Tb10.70.7320
Q388M7	Tb927.10.13720	RBP29	RNA-binding protein 29, putative	1.98067	Previous IDs: TRYP_x-61h03.q2kb185_478;Tb10.61.3200
Q38DP9	Tb927.9.11270	TCP-1-eta	t- complex protein 1 (eta subunit), putative, T-complex protein 1, eta subunit, putative	1.97872	Previous IDs: Tb09.211.2570;Tb09.211.2570:mRNA;Tb09.211.2570:pep;chr9contig211.tmp0295
Q587E3	Tb927.6.4770		Uncharacterized protein	1.9761
Q386L6	Tb927.11.2950	NUP89	Nucleoporin NUP89	1.97486	Previous IDs: Tb11.02.0460;Tb11.02.0460:mRNA;Tb11.02.0460:pep
Q38AM9	Tb927.10.7330;Tb927.10.7340		40S ribosomal protein S24E, putative	1.971	Previous IDs: TRYPtp6k15-3d06.p1c_475;TRYPtp6k15-3d06.p1c_476;Tb10.6k15.3340;Tb10.6k15.3350
Q57YQ5;Q580Q1	Tb927.8.6980		Uncharacterized protein	1.9541
Q381A5	Tb927.11.16810		dynein light intermediate chain D1bLIC, putative	1.95261	Previous IDs: Tb11.01.8570;Tb11.01.8570:mRNA;Tb11.01.8570:pep
Q57WB1	Tb427.03.3750	PFC7	paraflagellar rod component, putative	1.9452	Previous IDs: Tb427tmp.28C22.770;current=false
Q383B2	Tb927.11.11680		2-oxoglutarate dehydrogenase E2 component, putative	1.93219	Previous IDs: Tb11.01.3550;Tb11.01.3550:mRNA;Tb11.01.3550:pep
Q385X1	Tb927.11.4460	ALBA1	ALBA-Domain Protein	1.93085	Previous IDs: TRYP_xi-1013a02.q1k_50;Tb11.02.2040;Tb11.02.2040:mRNA;Tb11.02.2040:pep
Q580N5	Tb427.03.4070		hypothetical protein, conserved	1.92528	Previous IDs: Tb427tmp.26J7.120;current=false
Q584N8	Tb927.2.100	RHS1	retrotransposon hot spot protein 1 (RHS1), putative	1.91445
Q57VR7	Tb927.7.710		Heat shock 70 kDa protein, putative	1.91348
D7SGA2;Q57UU9;Q57UU8;Q57UU7;Q57UU6;Q57UU5	Tb927.2.340		Retrotransposon hot spot (RHS) protein, putative	1.90868
Q57YE1	Tb427.08.900	TSR1	splicing factor TSR1	1.90659	Previous IDs: Tb427tmp.12O16.540;current=false
Q57XR0	Tb927.7.6900	SCC1	Sister chromatid cohesion protein 1	1.9064	Previous IDs: Tb07.21H15.570
Q38BS5	Tb10.70.4280		Delta-1-pyrroline-5-carboxylate dehydrogenase, putative	1.90332
Q38BC1	Tb10.70.2400		Uncharacterized protein	1.89091
Q388C4;O76286	Tb10.61.1810		Mitochondrial carrier protein, putative	1.88897
Q38FR6	Tb09.160.1200		Mitotubule-associated protein Gb4, putative	1.87478
Q382L3	Tb927.11.13230	VAP	VAMP-associated protein, putative	1.86815	Previous IDs: Tb11.01.4810;Tb11.01.4810:mRNA;Tb11.01.4810:pep
Q583I6	Tb427.04.2070		antigenic protein, putative	1.85088	Previous IDs: Tb427tmp.29M18.750;current=false
Q382B2	Tb927.11.14250	TCP-1-epsilon	T-complex protein 1, epsilon subunit, putative	1.84526	Previous IDs: Tb11.01.5860;Tb11.01.5860:mRNA;Tb11.01.5860:pep
Q386T4	Tb927.11.2250		conserved protein, unknown function	1.84062	Previous IDs: Tb11.18.0005;Tb11.18.0005:mRNA;Tb11.18.0005:pep
Q386W9	Tb927.11.1900		T-complex protein 1, beta subunit, putative	1.82595	Previous IDs: Tb11.42.0003;Tb11.42.0003:mRNA;Tb11.42.0003:pep
B5LEK4;B5LEL2;B3GVR7;B3GVQ8;B3GVP7;B3GVN9;G1CRP2;B5LEJ5;Q8I8G5;Q8I8G4			ESAG6 type 13 (Fragment)	1.81689
Q387T8	Tb927.10.15760	CAP36	Cytoskeleton-associated protein 36 kDa	1.80247	Previous IDs: TRYP_x-61h03.q2kb185_87;Tb10.61.0540
Q383X0	Tb927.11.9590		S-adenosylhomocysteine hydrolase, putative	1.80191	Previous IDs: Tb11.01.1350;Tb11.01.1350:mRNA;Tb11.01.1350:pep
Q586Z6;Q586Z5;A0A0M4HMZ4	Tb927.6.4300		Glyceraldehyde-3-phosphate dehydrogenase	1.79432
Q585H0	Tb927.2.1170	RHS5	retrotransposon hot spot protein 5 (RHS5), putative	1.77892
Q71SQ4;Q38EX8	TXNPx		Tryparedoxin peroxidase	1.77617
Q381I7	Tb927.11.15990	NUP109	Nucleoporin NUP109	1.77091	Previous IDs: Tb11.01.7630;Tb11.01.7630:mRNA;Tb11.01.7630:pep
Q586M2	Tb927.2.2510		Uncharacterized protein	1.76143
Q383S6	Tb927.11.10025;Tb927.11.10030		60S ribosomal protein L29, putative	1.7579	Previous IDs: NTCDS.Tb11.NT.118;Tb11.01.1790;Tb11.01.1790:mRNA;Tb11.01.1790:pep;Tb11.NT.118_2
D6XLG8	Tb927.8.4330	RAB11	small GTP-binding protein Rab11	1.75425	Previous IDs: Tb08.29H22.590
Q580T8	Tb427.03.5370		hypothetical protein, conserved	1.75415	Previous IDs: Tb427tmp.5L5.570;current=false
Q57VP3;P17959	Tb10.70.1380		40S ribosomal protein S9, putative	1.74493
Q580K6	Tb927.11.6140;Tb927.3.4360		40S ribosomal protein S15A, putative	1.74473	Previous IDs: Tb03.26J7.620;Tb11.02.4000;Tb11.02.4000:mRNA;Tb11.02.4000:pep;Tb11.212.0060
Q57XK6	Tb927.3.3560		U-box domain containing protein, putative	1.74257	Previous IDs: Tb03.25B21.20
Q38B98;Q57WI3	Tb10.70.2170		Ubiquitin/ribosomal protein S27a, putative	1.73902
Q389E6	Tb927.10.11960	PNUTS	Serine/threonine-protein phosphatase 1 regulatory subunit, putative	1.72972	Previous IDs: Tb10.389.1820
Q384J8	Tb11.01.0340		RAD50 DNA repair-like protein	1.71974
Q586H9;REV__Q386U3	Tb927.6.5070		Uncharacterized protein	1.71188
Q38EV6	Tb09.160.4520		Calmodulin, putative	1.70935
Q383V8	Tb927.10.13500;Tb927.11.9710	RPL10A	60S ribosomal protein L10a;60S ribosomal protein L10a, putative	1.69684	Previous IDs: Tb10.05.0220;Tb11.01.1470;Tb11.01.1470:mRNA;Tb11.01.1470:pep
Q38DX9	Tb927.9.10310	MCP11	mitochondrial carrier protein 11	1.69194	Previous IDs: Tb09.211.1750;Tb09.211.1750:mRNA;Tb09.211.1750:pep;chr9contig211.tmp0206c
Q388M8	Tb927.10.13710		Activator of Hsp90 ATPase, N-terminal/Activator of Hsp90 ATPase homolog 1-like protein, putative	1.6901	Previous IDs: TRYP_x-61h03.q2kb185_481;Tb10.61.3210
Q57ZC7	Tb427.03.1840		3-oxo-5-alpha-steroid 4-dehydrogenase, putative	1.68657	Previous IDs: Tb427tmp.30P12.550;current=false
Q57YE9	Tb927.8.820		VID27 cytoplasmic protein, putative	1.66655	Previous IDs: Tb08.12O16.390
Q38CY6;Q38C82	Tb09.244.2725		Ribosomal protein L36, putative	1.6605
Q57VT8	Tb927.7.920		Dynein heavy chain, putative	1.6567
Q57VZ5	Tb927.8.4400	pDC1	Outer dynein arm docking complex protein 1, putative	1.6558	Previous IDs: Tb08.29H22.780
Q38CW7	Tb09.244.2570		Calcium motive P-type ATPase, putative	1.6494
Q586I4;P51408	Tb927.6.5120		60S acidic ribosomal protein P2, putative	1.64853
Q380Y7;E7BBN6	Tb11.01.8770		Uncharacterized protein	1.64793
Q387K0;Q387K1	Tb11.03.0580		RNA-binding protein, putative	1.6396
Q581A7	Tb927.8.3870	NOP127	Nucleolar protein 127	1.63755	Previous IDs: Tb08.10J17.380
Q4GZ63	Tb427.01.1560		N-ethylmaleimide sensitive factor (NsF)	1.63566
Q38FB8	Tb927.9.4210	ACS3	fatty acyl CoA synthetase 3	1.63251	Previous IDs: Tb09.160.2810;Tb09.160.2810:mRNA;Tb09.160.2810:pep;chr9contig160.tmp0231
Q38A80	Tb927.10.8940	KH1	flagellum targeting protein kharon1, putative	1.60598	Previous IDs: TRYPtp6k15-3d06.p1c_221;Tb10.6k15.1500
P30615;Q388I8	Tb427.10.14140	PYK1	Pyruvate kinase 1	1.60302
Q57ZS7	Tb927.5.2080	GMPR	GMP reductase	1.59583	Previous IDs: Tb05.1P6.110
Q57UT9	Tb927.4.360		Uncharacterized protein	1.5788
Q38AZ9	Tb927.10.6070	UMSBP1	universal minicircle sequence binding protein 1	1.57832	Previous IDs: TRYP_x-70a06.p2kb545_117;Tb10.70.0800
Q587D3	Tb927.6.4670		Uncharacterized protein	1.57041
Q38EN1	Tb927.9.7110		GRAM domain containing protein, putative	1.54567	Previous IDs: Tb09.160.5200;Tb09.160.5200:mRNA;Tb09.160.5200:pep;Tb927.9.7130;Tb927.9.7130:mRNA;Tb927.9.7130:pep;chr9contig160.tmp0406
Q384D3	Tb927.11.8950	LRRP1	leucine rich repeat	1.53982	Previous IDs: Tb11.01.0680;Tb11.01.0680:mRNA;Tb11.01.0680:pep
Q383J9	Tb927.11.10800	MC10	microtubule inner protein MC10	1.53471	Previous IDs: Tb11.01.2570;Tb11.01.2570:mRNA;Tb11.01.2570:pep
Q38AQ4;Q26710	Tb10.6k15.3640		Alternative oxidase	1.53096
P50098			Inosine-5-monophosphate dehydrogenase	1.52057
Q384Y3;Q9BHJ6	Tb11.02.4700		14-3-3-like protein, putative	1.51484
Q38BV4	Tb10.70.4700		Splicing factor PTSR1 interacting protein	1.50582
Q38F14	Tb927.9.5410	MC14	microtubule inner protein MC14	1.49861	Previous IDs: Tb09.160.3930;Tb09.160.3930:mRNA;Tb09.160.3930:pep;chr9contig160.tmp0304
Q57X06	Tb427.08.5760		hypothetical protein, conserved	1.47534	Previous IDs: Tb427tmp.26E13.490;current=false
Q57XX0	Tb10.70.4800		40S ribosomal protein S25, putative	1.467
Q4FKP3	Tb10.v4.0045;Tb927.10.4310	PHB2	chrX additional, unordered contigs, prohibitin, putative;prohibitin 2, putative	1.44655	Previous IDs: TRYP_x-70a06.p2kb545_389;Tb10.70.2920
Q57XN7	Tb427.07.2340;Tb427.07.2370		40S ribosomal protein S15, putative	1.44237	Previous IDs: Tb427tmp.22O10.320;Tb427tmp.22O10.360;current=false
Q4GZB9	Tb427.01.990		hypothetical protein, conserved	1.4403
Q389P7	Tb927.10.10830	RESC13	RNA-editing substrate binding complex protein RESC13	1.4401	Previous IDs: Tb10.406.0050
Q582N1	Tb427.03.5060		hypothetical protein, conserved	1.43475	Previous IDs: Tb427tmp.48K5.840;current=false
Q387E7	Tb927.11.1030	kkt7	kinetoplastid kinetochore protein 7	1.39367	Previous IDs: Tb11.03.0080;Tb11.03.0080:mRNA;Tb11.03.0080:pep
Q388J8	Tb927.10.14010	rp2	tubulin cofactor C domain-containing protein RP2	1.38634	Previous IDs: TRYP_x-61h03.q2kb185_429;Tb10.61.2870
Q4GYE7	Tb927.1.4310	FAZ2	Flagellum attachment zone protein 2	1.38447
Q382S8	Tb927.11.12530	FAZ3	Flagellum attachment zone protein 3	1.3812	Previous IDs: Tb11.01.4370;Tb11.01.4370:mRNA;Tb11.01.4370:pep
Q38E01	Tb927.9.10010	J34	chaperone protein DnaJ, putative	1.37407	Previous IDs: Tb09.211.1550;Tb09.211.1550:mRNA;Tb09.211.1550:pep;chr9contig211.tmp0183c
Q57ZM3	Tb427.03.2890		radial spoke protein RSP10, putative	1.37267	Previous IDs: Tb427tmp.27C5.280;current=false
Q57WJ7;Q57XZ9	Tb927.8.8330		Calpain, putative	1.36567
Q580A3	Tb427.04.750		50S ribosomal protein L7Ae, putative	1.35652	Previous IDs: Tb427tmp.5E12.940;current=false
Q57W35;Q57W36	Tb927.5.900		Oligosaccharyl transferase subunit, putative	1.33194
Q382N3;P69097	Tb11.01.4621		Calmodulin	1.32431
Q584N3;Q584M9	Tb927.2.280		Retrotransposon hot spot (RHS) protein, putative	1.32403
Q38DX4	Tb09.211.1800		Uncharacterized protein	1.31283
Q583I7	Tb927.4.2060	FAZ8	Flagellum attachment zone protein 8	1.30428	Previous IDs: Tb04.29M18.730
Q388W4	Tb927.10.12820		hypothetical protein, conserved	1.30245	Previous IDs: Tb10.389.0720

## Sheet: SuppFile1e_WTNoYFPv147R-TALE
UniProt ID	TriTryp ID	NAME	DESCRIPTION	-Log Student's T-test p-value WT_CIR147	Previous ID(s)
Q585Y5	Tb927.6.3870	SGN1	RNA-binding protein, putative	4.99922
Q57WZ3	Tb427.03.1120	rtb2	GTP-binding nuclear protein rtb2, putative	4.31575	Previous IDs: Tb427tmp.27F10.90;current=false
Q388E8	Tb10.61.2130	HEL67	ATP-dependent RNA helicase HEL67	3.92149
Q580Z5	Tb927.8.3750	NOP56	nucleolar protein 56	3.90384	Previous IDs: Tb08.10J17.600
Q386A6	Tb11.02.1566		Variant surface glycoprotein (VSG)-related, putative	3.81707
Q57WB1	Tb427.03.3750	PFC7	paraflagellar rod component, putative	3.7631	Previous IDs: Tb427tmp.28C22.770;current=false
Q38DX4	Tb09.211.1800		hypothetical protein, conserved	3.61708
Q38F38	Tb927.9.5150	SNU13	13 kDa ribonucleoprotein-associated protein, putative	3.60919	Previous IDs: Tb09.160.3670;Tb09.160.3670:mRNA;Tb09.160.3670:pep;chr9contig160.tmp0286
Q389P7	Tb927.10.10830	RESC13	RNA-editing substrate binding complex protein RESC13	3.58405	Previous IDs: Tb10.406.0050
Q581X8	Tb927.8.2040		Domain of unknown function (DUF1767), putative	3.39902	Previous IDs: Tb08.26N11.520
Q38F23	Tb09.160.3820		Nucleolar RNA binding protein, putative	3.30423
Q57YF6	Tb927.8.750	NOPP44/46-2	nucleolar RNA-binding protein, putative	3.27043	Previous IDs: Tb08.12O16.320
Q38AL4	Tb927.10.7500	NOP1	fibrillarin	3.1833	Previous IDs: TRYPtp6k15-3d06.p1c_454;Tb10.6k15.3160;embl.30
Q57YE1	Tb427.08.900	TSR1	splicing factor TSR1	2.91226	Previous IDs: Tb427tmp.12O16.540;current=false
Q383Y9	Tb927.11.9400		hypothetical protein, conserved	2.79461	Previous IDs: Tb11.01.1170;Tb11.01.1170:mRNA;Tb11.01.1170:pep
Q384B1;A4URT2	Tb927.11.9170	TOPOIII	DNA topoisomerase III, putative	2.7149
Q38BS6	Tb927.10.3200	U2AF35	U2 splicing auxiliary factor, putative	2.48332	Previous IDs: TRYP_x-70a06.p2kb545_577;Tb10.70.4300
Q57U36	Tb927.7.180		Trypanosomal VSG domain containing protein, putative	2.40966
Q388M7	Tb927.10.13720	RBP29	RNA-binding protein 29, putative	2.28565	Previous IDs: TRYP_x-61h03.q2kb185_478;Tb10.61.3200
Q385X1	Tb927.11.4460	ALBA1	ALBA-Domain Protein	2.27482	Previous IDs: TRYP_xi-1013a02.q1k_50;Tb11.02.2040;Tb11.02.2040:mRNA;Tb11.02.2040:pep
Q584Q1	Tb427.06.2550	TRRM2	RNA-binding protein, putative	2.26123	Previous IDs: Tb427tmp.4M18.1180;current=false
Q382W0	Tb927.11.12210		Domain of unknown function (DUF4586), putative	2.14835	Previous IDs: Tb11.01.4030;Tb11.01.4030:mRNA;Tb11.01.4030:pep
Q585X3	Tb927.6.3740		Heat shock 70 kDa protein, mitochondrial, putative	2.09083
Q4GYC9	Tb927.1.4490	NAT2	N-acetyltransferase 2, putative	2.04465
Q583J0	Tb427.04.2030	ALBA4	hypothetical protein, conserved	2.03708	Previous IDs: Tb427tmp.29M18.690;current=false
Q38A35	Tb927.10.9400	SF1	splicing factor 1	2.01442	Previous IDs: TRYPtp6k15-3d06.p1c_142;Tb10.6k15.1000
Q38DF6	Tb927.9.12510	DED1	ATP-dependent DEAD/H RNA helicase, putative	1.98996	Previous IDs: Tb09.211.3510;Tb09.211.3510:mRNA;Tb09.211.3510:pep;chr9contig211.tmp0394
Q388T6	Tb927.10.13110	LC7	Outer arm dynein light chain 7	1.97701	Previous IDs: Tb10.389.0350
Q38A81	Tb927.10.8930	PFC18	paraflagellar rod component, putative	1.95502	Previous IDs: TRYPtp6k15-3d06.p1c_222;Tb10.6k15.1510
Q57XP1	Tb927.7.2330		Protein of unknown function (DUF1663), putative	1.93906
Q38AI3	Tb927.10.7810	ESF1	Pre-rRNA-processing protein ESF1, putative	1.86672	Previous IDs: TRYPtp6k15-3d06.p1c_404;Tb10.6k15.2760
Q382U0	Tb927.11.12410	KKT10	kinetoplastid kinetochore protein 10	1.82941	Previous IDs: Tb11.01.4230;Tb11.01.4230:mRNA;Tb11.01.4230:pep
Q38CM1	Tb927.10.170	CBF5	pseudouridine synthase, Cbf5p	1.78088	Previous IDs: Tb10.100.0060
Q388E0;Q388C9	Tb10.61.2040		Fibrillarin, putative	1.74438
Q57WX6	Tb927.3.930	OADalpha	dynein heavy chain, putative	1.70315	Previous IDs: Tb03.27F10.490
Q382C7	Tb927.11.14100	DRBD4	Double RNA-binding domain containing protein 4	1.60962	Previous IDs: Tb11.01.5690;Tb11.01.5690:mRNA;Tb11.01.5690:pep
Q57UY7	Tb927.8.4640		Flagellar protofilament ribbon protein, putative	1.57932
Q586R7;Q26692	Tb927.2.4710		RNA-binding protein, putative	1.56682
Q38B66;Q38B67	Tb10.70.1670		40S ribosomal protein S10, putative	1.56497
Q38DP2	Tb09.211.2630		60S ribosomal protein L23, putative	1.4867
Q38AM2	Tb10.6k15.3250		Succinate--CoA ligase [ADP-forming] subunit beta, mitochondrial	1.46549
Q580Q4;Q57YR8	Tb927.4.5310		Serine/threonine-protein kinase A, putative	1.442
Q57US8	Tb427.04.470		snoRNP protein GAR1, putative	1.42377	Previous IDs: Tb427tmp.5D20.620;current=false
Q57ZQ1	Tb427.05.1820		60S acidic ribosomal protein, putative	1.40797	Previous IDs: Tb427tmp.1P6.710;current=false
Q38EU7	Tb927.9.6320		hypothetical protein, conserved	1.40304	Previous IDs: Tb09.160.4610;Tb09.160.4610:mRNA;Tb09.160.4610:pep;Tb927.9.6340;Tb927.9.6340:mRNA;Tb927.9.6340:pep;chr9contig160.tmp0347
Q71SQ4;Q38EX8	Tb09.160.4250	TRYP1	tryparedoxin peroxidase	1.38838
Q386I7	Tb927.11.3240	TCP-1-zeta	T-complex protein 1, zeta subunit, putative	1.38473	Previous IDs: Tb11.02.0750;Tb11.02.0750:mRNA;Tb11.02.0750:pep
Q382Z8	Tb927.11.11820;Tb927.11.11830		40S ribosomal protein S17, putative	1.364	Previous IDs: 237.t00946;237.t00947;Tb11.01.3675;Tb11.01.3675:mRNA;Tb11.01.3675:pep;Tb11.01.3676;Tb11.01.3676:mRNA;Tb11.01.3676:pep
Q583M2	Tb927.6.3120	J24	chaperone protein DnaJ, putative	1.36192	Previous IDs: Tb06.5F5.890
Q383E5;A0A0U2KFL3	Tb11.01.3110		Heat shock protein 70	1.33656
Q4GYZ5	Tb927.1.2260	SMP1-2	small myristoylated protein 1-2	1.31498
Q585L0	Tb927.4.3400		hypothetical protein, conserved	1.31062	Previous IDs: Tb04.26G5.100

## Sheet: SuppFile1f_NonR-TALEv147R-TALE
UniProt ID	TriTryp ID	NAME	DESCRIPTION	-Log Student's T-test p-value NO-REPEAT-TALE_CIR147	Previous ID(s)
Q585Y5	Tb927.6.3870	SGN1	RNA-binding protein, putative	5.82496
Q583I6	Tb427.04.2070		antigenic protein, putative	4.97913	Previous IDs: Tb427tmp.29M18.750;current=false
Q389E9	Tb927.10.11930		beta-D-hydroxybutyrate dehydrogenase	4.79274	Previous IDs: Tb10.389.1850
Q582T6	Tb427.03.2230		succinyl-CoA synthetase alpha subunit, putative	4.70668	Previous IDs: Tb427tmp.48O8.710;current=false
Q38C41	Tb927.10.2020	HK2	hexokinase	4.11124	Previous IDs: Tb10.70.5800
Q57YF6	Tb927.8.750	NOPP44/46-2	nucleolar RNA-binding protein, putative	3.9165	Previous IDs: Tb08.12O16.320
Q9NDH8;Q38BV6	Tb10.70.4740		Enolase	3.90783
Q38CJ9	Tb927.10.390		DUF2407 ubiquitin-like domain containing protein, putative	3.84556	Previous IDs: TRYP_x-70a06.p2kb545_1092;Tb10.70.7950
Q57WR6	Tb927.7.1320		10 kDa heat shock protein, putative	3.64274
Q38C95	Tb10.70.6570	CAAP1	Centrin arm-associated protein 1terized protein	3.60117
Q57XD5	Tb927.8.2540	SCP2	3-ketoacyl-CoA thiolase	3.56289	Previous IDs: Tb08.26A17.500
Q9N9D0;Q38DN1	Tb927.9.11580	gim5A	Gim5A protein, glycosomal membrane protein	3.55282	Previous IDs: Tb09.211.2730;Tb09.211.2730:mRNA;Tb09.211.2730:pep;chr9contig211.tmp0312
Q381H3	Tb927.11.16130	NDPK	nucleoside diphosphate kinase	3.46852	Previous IDs: Tb11.01.7800;Tb11.01.7800:mRNA;Tb11.01.7800:pep
Q382C8	Tb927.11.14090	DRBD18	Double RNA binding domain protein 18	3.43888	Previous IDs: Tb11.01.5680;Tb11.01.5680:mRNA;Tb11.01.5680:pep
Q585J1;Q585J3	Tb927.4.3590		Translation elongation factor 1-beta, putative	3.42973
Q389N1	Tb10.26.0960		paraflagellar rod protein	3.41183
Q57UP8	Tb927.7.4180		Elongation of fatty acids protein	3.40583
Q582M8	Tb927.3.5090	TXN2	tryparedoxin 2, putative	3.36688	Previous IDs: Tb03.48K5.910
Q581X8	Tb927.8.2040		Domain of unknown function (DUF1767), putative	3.3249	Previous IDs: Tb08.26N11.520
P17546;P17545;Q584K3;Q57YU2		TRP4.8	DNA-directed RNA polymerase II subunit RPB1-A	3.25273
Q57YL2	Tb927.8.6110	HMGS	3-hydroxy-3-methylglutaryl-CoA synthase, putative	3.24797	Previous IDs: Tb08.11J15.640
Q584T9	Tb927.6.2170	MGE1	co-chaperone GrpE, putative	3.19221	Previous IDs: Tb06.4M18.480
Q57WB1	Tb427.03.3750	PFC7	paraflagellar rod component, putative	3.17682	Previous IDs: Tb427tmp.28C22.770;current=false
Q384B1;A4URT2	Tb11.01.0910		DNA topoisomerase III, putative	3.1692
Q9NJP9;Q38DF2;Q38DE9;Q38DF3;Q38DF0	Tb927.9.12590;Tb927.9.12630	glk1	glycerol kinase, glycosomal	3.16478	Previous IDs: Tb09.211.3560;Tb09.211.3590;Tb09.211.3560:mRNA;Tb09.211.3560:pep;Tb09.211.3590:mRNA;Tb09.211.3590:pep;chr9contig211.tmp0399;chr9contig211.tmp0402
Q381B0	Tb11.01.8510		T-complex protein 1, alpha subunit, putative	3.16225
Q585X3	Tb927.6.3740		Heat shock 70 kDa protein, mitochondrial, putative	3.15414
Q38E94;P12432;P12433	Tb09.211.0620		Actin A	3.14681
Q385X1	Tb927.11.4460	ALBA1	ALBA-Domain Protein	3.12829	Previous IDs: TRYP_xi-1013a02.q1k_50;Tb11.02.2040;Tb11.02.2040:mRNA;Tb11.02.2040:pep
Q38AK7	Tb927.10.7570	PDH-E2	dihydrolipoamide acetyltransferase E2 subunit, putative	3.09718	Previous IDs: TRYPtp6k15-3d06.p1c_444;Tb10.6k15.3080
D6XMQ7	Tb927.8.890	Rab1A	Ras-related protein Rab1A	3.07227	Previous IDs: Tb08.12O16.530
Q38AV5;Q37683	Tb10.70.0280		Chaperonin Hsp60, mitochondrial	3.02281
Q388W2	Tb927.10.12840	MCP12	mitochondrial carrier protein	3.00521	Previous IDs: Tb10.389.0690
Q57XJ5	Tb927.3.3450	ARL3A	ADP-ribosylation factor-like protein 3, putative	2.99353	Previous IDs: Tb03.25B21.123
Q38DN0	Tb927.9.11600	GIM5B	glycosomal membrane protein	2.98639	Previous IDs: Tb09.211.2740;Tb09.211.2740:mRNA;Tb09.211.2740:pep;chr9contig211.tmp0313
Q38AC0;Q38AB9;Q09039;Q38AB8;Q06222	Tb10.6k15.2040		Hexose transporter	2.96964
Q385E6	Tb927.11.6230		protein transport protein SEC61 subunit alpha, putative	2.84014	Previous IDs: Tb11.02.4100;Tb11.02.4100:mRNA;Tb11.02.4100:pep
Q384S7	Tb927.11.7380	G3PDH	glycerol-3-phosphate dehydrogenase (FAD-dependent), mitochondrial	2.7735	Previous IDs: Tb11.02.5280;Tb11.02.5280:mRNA;Tb11.02.5280:pep
Q38D64;Q38D65	Tb09.211.4470		ADP-ribosylation factor, putative	2.72576
Q38AI3	Tb927.10.7810	ESF1	Pre-rRNA-processing protein ESF1, putative	2.71413	Previous IDs: TRYPtp6k15-3d06.p1c_404;Tb10.6k15.2760
Q38EU9	Tb927.9.6290	AK1	arginine kinase	2.65217	Previous IDs: Tb09.160.4590;Tb09.160.4590:mRNA;Tb09.160.4590:pep;chr9contig160.tmp0345
Q57XG1;Q57XG2	Tb927.8.2260	POMP-32	Present in the outer mitochondrial membrane proteome 39-2	2.64921
Q382M3	Tb927.11.13130	MBAP1	membrane-bound acid phosphatase 1 precursor	2.64707	Previous IDs: Tb11.01.4701;Tb11.01.4701:mRNA;Tb11.01.4701:pep
Q386P5	Tb927.11.2650	TRAP1	heat shock protein 84, putative	2.62133	Previous IDs: Tb11.02.0250;Tb11.02.0250:mRNA;Tb11.02.0250:pep
Q386Q6	Tb927.11.2540		hypothetical protein, conserved	2.60339	Previous IDs: Tb11.02.0140;Tb11.02.0140:mRNA;Tb11.02.0140:pep
Q38C42;A0A3G1VTN5	Tb10.70.5820		Phosphotransferase	2.5972
Q57ZC9	Tb427.03.1820		hypothetical protein, conserved	2.55096	Previous IDs: Tb427tmp.30P12.500;current=false
Q388M7	Tb927.10.13720	RBP29	RNA-binding protein 29, putative	2.52651	Previous IDs: TRYP_x-61h03.q2kb185_478;Tb10.61.3200
Q386V3	Tb927.11.2050;Tb927.11.2060		60S acidic ribosomal protein P0, putative	2.51477	Previous IDs: Tb11.46.0001;Tb11.46.0002;Tb11.46.0001:mRNA;Tb11.46.0001:pep;Tb11.46.0002:mRNA;Tb11.46.0002:pep
Q383B2	Tb927.11.11680		2-oxoglutarate dehydrogenase E2 component, putative	2.51438	Previous IDs: Tb11.01.3550;Tb11.01.3550:mRNA;Tb11.01.3550:pep
Q386T4	Tb927.11.2250		conserved protein, unknown function	2.50788	Previous IDs: Tb11.18.0005;Tb11.18.0005:mRNA;Tb11.18.0005:pep
Q57YE1	Tb427.08.900	TSR1	splicing factor TSR1	2.47984	Previous IDs: Tb427tmp.12O16.540;current=false
D6XKT6	Tb927.8.1990	mPRX	peroxidoxin	2.46227	Previous IDs: Tb08.26N11.460
Q386N5	Tb927.11.2750	POMP12	Present in the outer mitochondrial membrane proteome 12	2.42123	Previous IDs: Tb11.02.0350;Tb11.02.0350:mRNA;Tb11.02.0350:pep
Q38BS6	Tb927.10.3200	U2AF35	U2 splicing auxiliary factor, putative	2.39668	Previous IDs: TRYP_x-70a06.p2kb545_577;Tb10.70.4300
Q586R7;Q26692	Tb927.2.4710	RRM1	RNA-binding protein, putative	2.37691
Q38B01	Tb927.10.6050	CHC	clathrin heavy chain	2.35587	Previous IDs: TRYP_x-70a06.p2kb545_120;Tb10.70.0830;embl.373
Q384Q5	Tb927.11.7460;Tb927.11.7510	BiP	luminal binding protein 1 (BiP), putative	2.35248	Previous IDs: Tb11.02.5450;Tb11.02.5500;Tb11.02.5450:mRNA;Tb11.02.5450:pep;Tb11.02.5500:mRNA;Tb11.02.5500:pep
Q57WH0	Tb927.7.3550	WCB	cytoskeleton associated protein, putative	2.2693	Previous IDs: Tb07.28B13.500
Q388B7;REV__CON__Q497I4	Tb10.61.1750		Kinesin-like protein	2.24954
Q38AM2	Tb10.6k15.3250		Succinate--CoA ligase [ADP-forming] subunit beta, mitochondrial	2.2482
Q4GYZ5	Tb927.1.2260	SMP1-2	small myristoylated protein 1-2	2.24205	NA
Q4GYY5	Tb427.01.2340;Tb427.01.2360;Tb427.01.2380;Tb427.01.2400		alpha tubulin	2.20268
Q383E5;A0A0U2KFL3	Tb11.01.3110		Heat shock protein 70	2.19472
Q38C25	Tb10.70.5560	FAP20	flagella associated protein FAP20	2.18458
Q57WE8	Tb927.7.3330	FAZ10	Flagellar attachment zone protein 10	2.18126	Previous IDs: Tb07.28B13.760
Q386P9	Tb927.11.2610	CAP50	Cytoskeleton-associated protein 50 kDa	2.17875	Previous IDs: Tb11.02.0210;Tb11.02.0210:mRNA;Tb11.02.0210:pep
Q388I4	Tb927.10.14180	SEC13	protein transport protein SEC13	2.17796	Previous IDs: TRYP_x-61h03.q2kb185_399;Tb10.61.2630
Q57WZ3	Tb427.03.1120	rtb2	GTP-binding nuclear protein rtb2, putative	2.15091	Previous IDs: Tb427tmp.27F10.90;current=false
Q57VE2	Tb427.05.1210		short-chain dehydrogenase, putative	2.13049	Previous IDs: Tb427tmp.30H13.140;current=false
Q38BE4	Tb927.10.4560;Tb927.10.4570		elongation factor 2	2.0773	Previous IDs: TRYP_x-70a06.p2kb545_355;TRYP_x-70a06.p2kb545_357;Tb10.70.2650;Tb10.70.2660
Q57UL8;Q26678;Q57UL6;Q57X35;P17882	Tb927.8.5460		Flagellar calcium-binding protein TB-44A	2.06253
Q38BS1	Tb10.70.4200		Fatty acyl CoA synthetase, putative	1.97624
Q583J0	Tb427.04.2030	ALBA4	hypothetical protein, conserved	1.945	Previous IDs: Tb427tmp.29M18.690;current=false
Q57UN6	Tb927.7.4060		Calpain-like cysteine peptidase, putative	1.91284
Q4GYY6	Tb427.01.2330;Tb427.01.2350;Tb427.01.2370;Tb427.01.2390		beta tubulin	1.90487
Q584N8	Tb927.2.100	RHS1	retrotransposon hot spot protein 1 (RHS1), putative	1.89051	NA
Q57US8	Tb427.04.470		snoRNP protein GAR1, putative	1.87721	Previous IDs: Tb427tmp.5D20.620;current=false
Q581X4	Tb427.08.2080		hypothetical protein, conserved	1.86686	Previous IDs: Tb427tmp.26N11.590;current=false
Q4FKD9;Q387H8	Tb11.0840		hypothetical protein	1.86267
Q57WB4;Q57WB2;O77404	Tb927.3.3780		Tryparedoxin	1.84863
Q57X63	Tb927.7.4470		hypothetical protein, conserved	1.84513
Q389P1	Tb11.v5.0543;Tb927.10.10890;Tb927.10.10900;Tb927.10.10920;Tb927.10.10940;Tb927.10.10950;Tb927.10.10960		Heat shock protein 83, putative;heat shock protein, putative	1.84055	Previous IDs: Tb10.329.0050;Tb10.329.0060;Tb10.329.0080;Tb10.329.0100;Tb10.329.0110;Tb10.329.0120
Q581Z5	Tb427.08.1870	tGLP1	Golgi/lysosome glycoprotein 1	1.81171	Previous IDs: Tb427tmp.26N11.310;current=false
Q38B23	Tb927.10.5810		The ARF-like 2 binding protein BART, putative	1.80268	Previous IDs: TRYP_x-70a06.p2kb545_157;Tb10.70.1130
Q385X2	Tb927.11.4450	ALBA2	ALBA-Domain Protein	1.78166	Previous IDs: TRYP_xi-1013a02.q1k_52;Tb11.02.2030;Tb11.02.2030:mRNA;Tb11.02.2030:pep
Q38B66;Q38B67	Tb10.70.1670		40S ribosomal protein S10, putative	1.78165
Q8IFI8	Tb927.1.120	RHS4	retrotransposon hot spot protein 4 (RHS4), putative	1.76488	NA
Q38F76	Tb927.9.4680	EIF4A1	Eukaryotic initiation factor 4A-1	1.69021	Previous IDs: Tb09.160.3270;Tb09.160.3270:mRNA;Tb09.160.3270:pep;chr9contig160.tmp0259
Q57TT7;Q57TT8	Tb927.8.6760		IgE-dependent histamine-releasing factor, putative	1.68813
Q585W3	Tb927.6.3650		ADP-ribosylation factor, putative	1.68443
Q389U9;Q389U1	Tb10.406.0650		Microtubule-associated protein, putative	1.61814
Q57ZK8	Tb427.03.3040		hypothetical protein, conserved	1.60383	Previous IDs: Tb427tmp.27C5.540;current=false
Q387T8	Tb927.10.15760	CAP36	Cytoskeleton-associated protein 36 kDa	1.5962	Previous IDs: TRYP_x-61h03.q2kb185_87;Tb10.61.0540
Q4GYC9	Tb927.1.4490	NAT2	N-acetyltransferase 2, putative	1.58924	NA
Q580Z5	Tb927.8.3750	NOP56	nucleolar protein 56	1.57675	Previous IDs: Tb08.10J17.600
Q57ZC7	Tb427.03.1840		3-oxo-5-alpha-steroid 4-dehydrogenase, putative	1.56375	Previous IDs: Tb427tmp.30P12.550;current=false
Q57XK9	Tb927.7.2650	CAP51V	Cytoskeleton associated protein 51V	1.56133	Previous IDs: Tb07.22O10.860
Q388C4;O76286	Tb10.61.1810		Mitochondrial carrier protein, putative	1.55189
Q38DX9	Tb927.9.10310	MCP11	mitochondrial carrier protein 11	1.51511	Previous IDs: Tb09.211.1750;Tb09.211.1750:mRNA;Tb09.211.1750:pep;chr9contig211.tmp0206c
Q386I7	Tb927.11.3240	TCP-1-zeta	T-complex protein 1, zeta subunit, putative	1.51497	Previous IDs: Tb11.02.0750;Tb11.02.0750:mRNA;Tb11.02.0750:pep
Q38F23	Tb09.160.3820		Nucleolar RNA binding protein, putative	1.47679
Q586M2	Tb927.2.2510		Uncharacterized protein	1.47265
D7SGA2;Q57UU9;Q57UU8;Q57UU7;Q57UU6;Q57UU5	Tb927.2.340		Retrotransposon hot spot (RHS) protein, putative	1.46607
Q57VR7	Tb927.7.710		Heat shock 70 kDa protein, putative	1.46351
Q388D3	Tb927.10.14600;Tb927.10.14710	RPS2	40S ribosomal protein S2, putative	1.4567	Previous IDs: TRYP_x-61h03.q2kb185_295;TRYP_x-61h03.q2kb185_310;Tb10.61.1960;Tb10.61.2070
Q382L3	Tb927.11.13230	VAP	VAMP-associated protein, putative	1.43964	Previous IDs: Tb11.01.4810;Tb11.01.4810:mRNA;Tb11.01.4810:pep
Q580S6	Tb427.03.5490	PIFTB2	flagellar transport protein, putative	1.43061	Previous IDs: Tb427tmp.5L5.700;current=false
Q382C7	Tb927.11.14100	DRBD4	Double RNA-binding domain containing protein 4	1.39687	Previous IDs: Tb11.01.5690;Tb11.01.5690:mRNA;Tb11.01.5690:pep
Q57ZQ1	Tb427.05.1820		60S acidic ribosomal protein, putative	1.36493	Previous IDs: Tb427tmp.1P6.710;current=false
Q4FKA8	Tb11.1380;Tb927.11.1840	CAP46	Cytoskeleton-associated protein 46 kDa	1.35181	Previous IDs: Tb11.39.0004;Tb11.39.0004:mRNA;Tb11.39.0004:pep
Q380Y7;E7BBN6	Tb11.01.8770		Uncharacterized protein	1.31991

## Sheet: SuppFile1g_WTNoYFPvIngiR-TALE
UniProt ID	TriTryp ID	NAME	DESCRIPTION	-Log Student's T-test p-value WT_INGI-TALE	Previous ID(s)
Q386A6	Tb11.02.1566		Variant surface glycoprotein (VSG)-related, putative	4.75869
Q388E8	Tb10.61.2130	HEL67	ATP-dependent RNA helicase HEL67	4.72699
Q388Z2	Tb927.10.12510		P-type H+-ATPase, putative	4.52677	Previous IDs: Tb10.389.1170
Q585Y5	Tb927.6.3870	SGN1	RNA-binding protein RBP14, putative	4.43955
Q57U36	Tb927.7.180		Trypanosomal VSG domain containing protein, putative	4.40064
Q382D5;Q382D7	Tb11.01.5590	NRBD2	nuclear RNA-bindin domain 2	4.24627
Q38B20	Tb927.10.5840		translation elongation factor 1-beta, putative	4.23971	Previous IDs: TRYP_x-70a06.p2kb545_154;Tb10.70.1100
Q389P7	Tb927.10.10830	RESC13	RNA-editing substrate binding complex protein RESC13	4.22097	Previous IDs: Tb10.406.0050
Q38DF6	Tb927.9.12510	DED1	ATP-dependent DEAD/H RNA helicase, putative	4.19057	Previous IDs: Tb09.211.3510;Tb09.211.3510:mRNA;Tb09.211.3510:pep;chr9contig211.tmp0394
D6XMU9;Q57VN6;Q57VN8	Tb927.8.1200		Calcium-transporting ATPase	4.10853
Q38FD9;Q38FE4	Tb09.160.2550		40S ribosomal protein S7	4.05447
Q38FF6	Tb927.9.3770		hypothetical protein, conserved	3.95296	Previous IDs: Tb09.160.2370;Tb09.160.2370:mRNA;Tb09.160.2370:pep;chr9contig160.tmp0203
Q389I7;Q38EW1	Tb10.26.0370		40S ribosomal protein S3, putative	3.93708
Q57YL6	Tb427.08.6150;Tb427.08.6160		40S ribosomal protein S8, putative	3.93229	Previous IDs: Tb427tmp.11J15.560;Tb427tmp.11J15.570;current=false
Q38CD0;Q587D5	Tb10.70.7010		60S ribosomal protein L9, putative	3.89451
Q381R1	Tb927.11.15240	RAB2B	Ras-related protein RAB2B, putative	3.88041	Previous IDs: Tb11.01.6890;Tb11.01.6890:mRNA;Tb11.01.6890:pep
Q38BK6;Q38BK7	Tb10.70.3360		40S ribosomal protein S3a	3.87571
Q57VM1	Tb427.08.1330;Tb427.08.1340		60S ribosomal protein L7a, putative	3.87178	Previous IDs: Tb427tmp.29O4.580;Tb427tmp.29O4.590;current=false
Q57W35;Q57W36	Tb927.5.900		Oligosaccharyl transferase subunit, putative	3.86713
Q38F38	Tb927.9.5150	SNU13	13 kDa ribonucleoprotein-associated protein, putative	3.83119	Previous IDs: Tb09.160.3670;Tb09.160.3670:mRNA;Tb09.160.3670:pep;chr9contig160.tmp0286
Q38DX4	Tb09.211.1800		hypothetical protein, conserved	3.76202
Q38B66;Q38B67	Tb10.70.1670		40S ribosomal protein S10, putative	3.68823
Q580H2	Tb927.8.1510	DBP2B	ATP-dependent RNA helicase DBP2B, putative	3.6542	Previous IDs: Tb08.29O9.160
Q57WZ3	Tb427.03.1120	rtb2	GTP-binding nuclear protein rtb2, putative	3.6513	Previous IDs: Tb427tmp.27F10.90;current=false
Q586I4;P51408	Tb927.6.5120		60S acidic ribosomal protein P2, putative	3.60901
Q38CZ1	Tb927.9.15090		cytosolic coat protein, putative	3.5825	Previous IDs: Tb09.244.2760;Tb09.244.2760:mRNA;Tb09.244.2760:pep;chr9contig244a01.tmp0276
Q383K0;Q383I8	Tb11.01.2560		40S ribosomal protein SA	3.58101
Q386V3	Tb927.11.2050;Tb927.11.2060		60S acidic ribosomal protein P0, putative	3.5442	Previous IDs: Tb11.46.0001;Tb11.46.0002;Tb11.46.0001:mRNA;Tb11.46.0001:pep;Tb11.46.0002:mRNA;Tb11.46.0002:pep
Q38DP2	Tb09.211.2630		60S ribosomal protein L23, putative	3.53812
Q386I7	Tb927.11.3240	TCP-1-zeta	T-complex protein 1, zeta subunit, putative	3.43601	Previous IDs: Tb11.02.0750;Tb11.02.0750:mRNA;Tb11.02.0750:pep
Q57US8	Tb427.04.470		snoRNP protein GAR1, putative	3.40056	Previous IDs: Tb427tmp.5D20.620;current=false
Q585J5	Tb427.04.3550;Tb427.05.1610		60S ribosomal protein L13a, putative	3.39105	Previous IDs: Tb427tmp.26G5.360;Tb427tmp.30H13.890;current=false
Q38CY6;Q38C82	Tb09.244.2725		Ribosomal protein L36, putative	3.36698
Q382C4	Tb927.10.3840;Tb927.11.14130		60S ribosomal protein L18a, putative;ribosomal protein L18, putative	3.35014	Previous IDs: TRYP_x-70a06.p2kb545_470;Tb11.01.5720;Tb10.70.3510;Tb11.01.5720:mRNA;Tb11.01.5720:pep
Q386F2	Tb11.v5.1059;Tb927.11.3590;Tb927.11.3600		40S ribosomal protein S4, putative	3.3292	Previous IDs: Tb11.02.1085;Tb11.02.1090;Tb11.02.1085:mRNA;Tb11.02.1085:pep;Tb11.02.1090:mRNA;Tb11.02.1090:pep
Q38E83	Tb927.9.9060	LSM12	Lsm12 protein, putative	3.32209	Previous IDs: Tb09.211.0740;Tb09.211.0740:mRNA;Tb09.211.0740:pep;chr9contig211.tmp0091c
Q38CX3	Tb09.244.2630		40S ribosomal protein S6	3.31585
Q38B98;Q57WI3	Tb10.70.2170		Ubiquitin/ribosomal protein S27a, putative	3.25107
Q38BI9;P49153;Q38BI8	Tb10.70.3170		60S ribosomal protein L30	3.22102
Q585L0	Tb927.4.3400		hypothetical protein, conserved	3.20754	Previous IDs: Tb04.26G5.100
Q389P1	Tb11.v5.0543;Tb927.10.10890;Tb927.10.10900;Tb927.10.10920;Tb927.10.10940;Tb927.10.10950;Tb927.10.10960		Heat shock protein 83, putative;heat shock protein, putative	3.20132	Previous IDs: Tb10.329.0050;Tb10.329.0060;Tb10.329.0080;Tb10.329.0100;Tb10.329.0110;Tb10.329.0120
Q385D9	Tb927.11.6300		40S ribosomal protein S5, putative	3.19728	Previous IDs: Tb11.02.4170;Tb11.02.4170:mRNA;Tb11.02.4170:pep
Q57V37;Q57V35	Tb927.7.1730		60S ribosomal protein L7, putative	3.19141
Q57YF6	Tb927.8.750	NOPP44/46-2	nucleolar RNA-binding protein, putative	3.18058	Previous IDs: Tb08.12O16.320
Q57WZ2	Tb427.03.1110	PIFTA1	flagellar transport protein, putative	3.13624	Previous IDs: Tb427tmp.27F10.120;current=false
Q57X62	Tb427.07.4460		hypothetical protein, conserved	3.1281	Previous IDs: Tb427tmp.26A24.970;current=false
Q387T8	Tb927.10.15760	CAP36	Cytoskeleton-associated protein 36 kDa	3.10441	Previous IDs: TRYP_x-61h03.q2kb185_87;Tb10.61.0540
Q38C01	Tb927.10.2440	MCA4	Metacaspase-4	3.10284	Previous IDs: Tb10.70.5250;embl.368
Q57U30	Tb427.07.230;Tb427.07.240		40S ribosomal protein S33, putative	3.093	Previous IDs: Tb427tmp.8P12.310;Tb427tmp.8P12.320;current=false
Q381J6	Tb927.11.15880;Tb927.11.15900		60S ribosomal protein L27, putative	3.08431	Previous IDs: Tb11.01.7535;Tb11.01.7545;Tb11.01.7535:mRNA;Tb11.01.7535:pep;Tb11.01.7545:mRNA;Tb11.01.7545:pep
Q388M8	Tb927.10.13710		Activator of Hsp90 ATPase, N-terminal/Activator of Hsp90 ATPase homolog 1-like protein, putative	3.08153	Previous IDs: TRYP_x-61h03.q2kb185_481;Tb10.61.3210
Q57ZQ1	Tb427.05.1820		60S acidic ribosomal protein, putative	3.07679	Previous IDs: Tb427tmp.1P6.710;current=false
D6XMQ7	Tb927.8.890	Rab1A	Ras-related protein Rab1A	3.06569	Previous IDs: Tb08.12O16.530
Q388D3	Tb927.10.14600;Tb927.10.14710	RPS2	40S ribosomal protein S2, putative	3.03345	Previous IDs: TRYP_x-61h03.q2kb185_295;TRYP_x-61h03.q2kb185_310;Tb10.61.1960;Tb10.61.2070
Q586Z6;Q586Z5;A0A0M4HMZ4	Tb927.6.4300		Glyceraldehyde-3-phosphate dehydrogenase	3.02049
Q383B1	Tb927.11.11690	VAB	Vacuolar proton pump subunit B, putative	2.99754	Previous IDs: Tb11.01.3560;Tb11.01.3560:mRNA;Tb11.01.3560:pep
P17843;D7SG81	Tb927.11.3230;Tb927.2.6090	RPL44	60S ribosomal protein L44	2.9669	Previous IDs: 36E18.45;Tb11.02.0740;Tb11.02.0740:mRNA;Tb11.02.0740:pep
Q57UQ9	Tb927.7.4290	NUDC1	Nuclear distribution protein C homolog	2.95903
Q3S1K6;Q38DS4	Tb927.9.11000	RAB7	ras-related protein RAB7, putative	2.95723	Previous IDs: Tb09.211.2330;Tb09.211.2330:mRNA;Tb09.211.2330:pep;chr9contig211.tmp0269c
Q38B00	Tb11.v5.0199;Tb927.10.6060	UMSBP2	universal minicircle sequence binding protein 2;universal minicircle sequence binding protein, putative	2.93501	Previous IDs: TRYP_x-70a06.p2kb545_119;Tb10.70.0820
Q583T1;P55842;Q383F5	Tb927.6.720		40S ribosomal protein L14, putative	2.92212
Q38F23	Tb09.160.3820		Nucleolar RNA binding protein, putative	2.92156
Q581X8	Tb927.8.2040		Domain of unknown function (DUF1767), putative	2.90375	Previous IDs: Tb08.26N11.520
Q389Z6	Tb927.10.9800		60S ribosomal protein L22	2.89597	Previous IDs: TRYPtp6k15-3d06.p1c_76;Tb10.6k15.0510
Q387J6	Tb927.11.550	SCD6	Suppressor of clathrin deficiency 6, putative	2.8937	Previous IDs: Tb11.03.0530;Tb11.03.0530:mRNA;Tb11.03.0530:pep
Q38FS0	Tb09.160.1160	NOP86	nucleolar protein	2.88387
Q383V7	Tb927.11.9720		40S ribosomal protein S27, putative	2.86707	Previous IDs: 237.t00934;Tb11.01.1475;Tb11.01.1475:mRNA;Tb11.01.1475:pep
Q38CI4	Tb927.10.560		40S ribosomal proteins S11, putative	2.85818	Previous IDs: 233.t00830;Tb10.70.7695
Q38BR9	Tb927.10.3280		60S ribosomal proteins L38, putative	2.85737	Previous IDs: 233.t00829;Tb10.70.4155
Q580S0	Tb427.03.5550	TbRX1	small GTP-binding protein, putative	2.85638	Previous IDs: Tb427tmp.5L5.790;current=false
B2ZWB7	Tb11.v5.0214;Tb927.5.295b	RHS1	retrotransposon hot spot (RHS) protein, putative;retrotransposon hotspot (RHS) protein 1	2.85572
Q580T8	Tb427.03.5370		hypothetical protein, conserved	2.85438	Previous IDs: Tb427tmp.5L5.570;current=false
Q57Z71	Tb427.05.3220		signal peptidase type I, putative	2.8348	Previous IDs: Tb427tmp.27M3.270;current=false
Q57WD3	Tb927.3.3970		Cell growth-regulating nucleolar protein, putative	2.80121	Previous IDs: Tb03.28C22.230
Q57VV0	Tb927.7.1040		40S ribosomal protein S16, putative	2.79785
Q57UX1	Tb927.8.4810		Prohibitin	2.79202
Q383V8	Tb927.10.13500;Tb927.11.9710	RPL10A	60S ribosomal protein L10a;60S ribosomal protein L10a, putative	2.7579	Previous IDs: Tb10.05.0220;Tb11.01.1470;Tb11.01.1470:mRNA;Tb11.01.1470:pep
Q383L0	Tb927.11.10690		hypothetical protein, conserved	2.72583	Previous IDs: Tb11.01.2460;Tb11.01.2460:mRNA;Tb11.01.2460:pep
Q382Z8	Tb927.11.11820;Tb927.11.11830		40S ribosomal protein S17, putative	2.71236	Previous IDs: 237.t00946;237.t00947;Tb11.01.3675;Tb11.01.3675:mRNA;Tb11.01.3675:pep;Tb11.01.3676;Tb11.01.3676:mRNA;Tb11.01.3676:pep
Q384B1;A4URT2	Tb11.01.0910		DNA topoisomerase	2.70625
Q38DU2	Tb09.211.2150		Polyadenylate-binding protein	2.68065
Q382C7	Tb927.11.14100	DRBD4	Double RNA-binding domain containing protein 4	2.67835	Previous IDs: Tb11.01.5690;Tb11.01.5690:mRNA;Tb11.01.5690:pep
Q38AL4	Tb927.10.7500	NOP1	fibrillarin	2.66684	Previous IDs: TRYPtp6k15-3d06.p1c_454;Tb10.6k15.3160;embl.30
Q38BK1	Tb927.10.3990	DHH1	DHH1	2.6655	Previous IDs: TRYP_x-70a06.p2kb545_441;Tb10.70.3290
Q584M6;Q8IFJ1	Tb927.2.510		Retrotransposon hot spot (RHS) protein, putative	2.6517
Q38AZ9	Tb927.10.6070	UMSBP1	universal minicircle sequence binding protein 1	2.63949	Previous IDs: TRYP_x-70a06.p2kb545_117;Tb10.70.0800
Q38AU2	Tb10.70.0120		COP-coated vesicle membrane protein erv25, putative	2.60588
Q385B8;Q385B9	Tb11.02.4360		40S ribosomal protein S21, putative	2.57858
Q57XC6	Tb927.8.2630	KIN-C	kinesin-C	2.57559	Previous IDs: Tb08.26A17.630
Q382B2	Tb927.11.14250	TCP-1-epsilon	T-complex protein 1, epsilon subunit, putative	2.5666	Previous IDs: Tb11.01.5860;Tb11.01.5860:mRNA;Tb11.01.5860:pep
Q57YE1	Tb427.08.900	TSR1	splicing factor TSR1	2.56304	Previous IDs: Tb427tmp.12O16.540;current=false
Q389K1	Tb927.10.11390		60S ribosomal protein L6, putative	2.53532	Previous IDs: Tb10.26.0560
Q581Q1;Q581Q2	Tb927.4.1800		Ribosomal protein L3, mitochondrial, putative	2.53444
Q580Z5	Tb927.8.3750	NOP56	nucleolar protein 56	2.52038	Previous IDs: Tb08.10J17.600
Q580D8;Q4FKD4	Tb927.4.1100		Ribosomal protein L21E (60S), putative	2.51715
Q38BV4	Tb10.70.4700		Splicing factor PTSR1 interacting protein	2.50693
Q38AE5	Tb927.10.8190		T-complex protein 1, theta subunit, putative	2.50055	Previous IDs: TRYPtp6k15-3d06.p1c_341;Tb10.6k15.2330
Q38D34	Tb927.9.14220	MCA5	metacaspase 5, putative	2.4994	Previous IDs: Tb09.211.4760;Tb09.211.4760:mRNA;Tb09.211.4760:pep;chr9contig211.tmp0524c;embl.369
Q57YZ8	Tb427.08.3150	TCP-1-gamma	T-complex protein 1, gamma subunit, putative	2.48262	Previous IDs: Tb427tmp.28L1.90;current=false
Q383E5;A0A0U2KFL3	Tb11.01.3110		Heat shock protein 70	2.48239
Q383S6	Tb927.11.10025;Tb927.11.10030		60S ribosomal protein L29, putative	2.45835	Previous IDs: NTCDS.Tb11.NT.118;Tb11.01.1790;Tb11.01.1790:mRNA;Tb11.01.1790:pep;Tb11.NT.118_2
Q38E16	Tb09.211.1390		Uncharacterized protein	2.45758
Q384J9	Tb927.11.8200		ribosomal protein S26, putative	2.44688	Previous IDs: 237.t00945;Tb11.01.0355;Tb11.01.0355:mRNA;Tb11.01.0355:pep
Q38CD4	Tb927.10.1060	TCP-1-delta	T-complex protein 1, delta subunit, putative	2.42737	Previous IDs: TRYP_x-70a06.p2kb545_973;Tb10.70.7050
Q388D4	Tb927.10.14700		hypothetical protein, conserved	2.40496	Previous IDs: TRYP_x-61h03.q2kb185_296;Tb10.61.1970
Q38A80	Tb927.10.8940	KH1	flagellum targeting protein kharon1, putative	2.40393	Previous IDs: TRYPtp6k15-3d06.p1c_221;Tb10.6k15.1500
Q587E3	Tb927.6.4770	MKT1	Uncharacterized protein	2.40159
Q57V53	Tb927.3.3330	HSP20	heat shock protein 20, putative	2.36847	Previous IDs: Tb03.3K10.400
Q57VW1	Tb927.5.520		Stomatin-like protein, putative	2.36471
Q383R3	Tb927.11.10160		60S ribosomal protein L22, putative	2.364	Previous IDs: Tb11.01.1920;Tb11.01.1920:mRNA;Tb11.01.1920:pep
Q580D6	Tb927.4.1080	VAA	V-type ATPase, A subunit, putative	2.36155	Previous IDs: Tb04.5E12.370
Q9GPE9;Q57XX1	Tb427.03.1380		ATP synthase subunit beta, mitochondrial	2.36154
Q38A35	Tb927.10.9400	SF1	splicing factor 1	2.36109	Previous IDs: TRYPtp6k15-3d06.p1c_142;Tb10.6k15.1000
Q384S7	Tb927.11.7380	G3PDH	glycerol-3-phosphate dehydrogenase (FAD-dependent), mitochondrial	2.34155	Previous IDs: Tb11.02.5280;Tb11.02.5280:mRNA;Tb11.02.5280:pep
Q38CW7	Tb09.244.2570		Calcium motive P-type ATPase, putative	2.333
Q38BY1	Tb10.70.5020		Uncharacterized protein	2.32655
Q57V56	Tb927.3.3300		Uncharacterized protein	2.32108
Q57Z55	Tb927.5.3400		Calcium-transporting ATPase	2.31054
Q388E0;Q388C9	Tb10.61.2040		Fibrillarin, putative	2.30849
Q4GYZ5	Tb927.1.2260	SMP1-2	small myristoylated protein 1-2	2.29294
Q38EY6	Tb927.9.5690		60S acidic ribosomal protein, putative	2.29027	Previous IDs: Tb09.160.4200;Tb09.160.4200:mRNA;Tb09.160.4200:pep;chr9contig160.tmp0317
Q582N1	Tb427.03.5060		hypothetical protein, conserved	2.27186	Previous IDs: Tb427tmp.48K5.840;current=false
Q385C5	Tb927.11.6440	ENF	Essential Nuclear Factor, 49 kDa	2.26645	Previous IDs: Tb11.02.4300;Tb11.02.4300:mRNA;Tb11.02.4300:pep
Q381A3	Tb927.11.16830	RABL5	Rab-like 5, small G protein	2.23194	Previous IDs: Tb11.01.8590;Tb11.01.8590:mRNA;Tb11.01.8590:pep
Q38DH8	Tb927.9.12200;Tb927.9.12240		60S ribosomal subunit protein L31, putative	2.22063	Previous IDs: Tb09.211.3270;Tb09.211.3280;Tb09.211.3270:mRNA;Tb09.211.3270:pep;Tb09.211.3280:mRNA;Tb09.211.3280:pep;chr9contig211.tmp0370;chr9contig211.tmp0371
Q388R1	Tb927.10.13360	EF-Tu	Elongation factor Tu, mitochondrial	2.20487	Previous IDs: Tb10.389.0070
Q57Z07	Tb427.05.4420		nucleolar RNA helicase Gu, putative	2.19907	Previous IDs: Tb427tmp.45E22.770;current=false
Q587B0	Tb927.6.4440	RBP42	RNA-binding protein 42 (RNA-binding motif protein 42)	2.19886	Previous IDs: Tb06.26G9.840
Q38DP9	Tb927.9.11270	TCP-1-eta	t- complex protein 1 (eta subunit), putative, T-complex protein 1, eta subunit, putative	2.19512	Previous IDs: Tb09.211.2570;Tb09.211.2570:mRNA;Tb09.211.2570:pep;chr9contig211.tmp0295
Q38EI9	Tb927.9.7590;Tb927.9.7620	L11	60S ribosomal protein L11, putative	2.16121	Previous IDs: Tb09.160.5580;Tb09.160.5590;Tb09.160.5580:mRNA;Tb09.160.5580:pep;Tb09.160.5590:mRNA;Tb09.160.5590:pep;chr9contig160.tmp0444c;chr9contig160.tmp0445c
Q57TY3	Tb927.7.7460	Z41AP	ZC3H41-associated protein	2.15856	Previous IDs: Tb07.30D13.320
Q38B69	Tb10.70.1730		40S ribosomal protein S18, putative	2.14985
Q4FKD8	Tb11.0845;Tb927.11.18680;Tb927.11.715	DYNLL1;DYNLL2	chrXI additional, unordered contigs, dynein light chain LC8, putative;dynein light chain LC8, putative	2.14375	Previous IDs: NCDS.Tb927.11.711;Tb11.50.0007;Tb11.50.0007:mRNA;Tb11.50.0007:pep;Tb927.11.711
Q385M4	Tb927.11.5440		NADP-dependent malic enzyme, cytosolic	2.14138	Previous IDs: Tb11.02.3120;Tb11.02.3120:mRNA;Tb11.02.3120:pep;Tb11.212.0950
Q38CM1	Tb927.10.170	CBF5	pseudouridine synthase, Cbf5p	2.13519	Previous IDs: Tb10.100.0060
P09194;Q586B7			Variant-surface-glycoprotein phospholipase C	2.13181
D6XLG8	Tb927.8.4330	RAB11	small GTP-binding protein Rab11	2.128	Previous IDs: Tb08.29H22.590
Q57WJ7;Q57XZ9	Tb927.8.8330		Calpain, putative	2.10725
Q38E94;P12432;P12433	Tb09.211.0620		Actin A	2.09672
Q388W4	Tb927.10.12820		hypothetical protein, conserved	2.09516	Previous IDs: Tb10.389.0720
Q382Y3	Tb927.11.11965;Tb927.11.11975;Tb927.11.11980	CAP15	cytoskeleton-associated protein 15;cytoskeleton-associated protein, putative	2.09478	Previous IDs: NCDS.Tb927.11.11965;NTCDS.Tb11.NT.142;Tb11.01.3805;Tb11.01.3805:mRNA;Tb11.01.3805:pep
Q38EC5	Tb927.9.8070;Tb927.9.8420	QM	QM-like protein, 60S ribosomal protein L10, putative	2.09318	Previous IDs: Tb09.211.0110;Tb09.211.0340;Tb09.211.0110:mRNA;Tb09.211.0110:pep;Tb09.211.0340:mRNA;Tb09.211.0340:pep;chr9contig211.tmp0011c;chr9contig211.tmp0042c
Q583I9	Tb427.04.2040	ALBA3	hypothetical protein, conserved	2.0536	Previous IDs: Tb427tmp.29M18.710;current=false
Q586H9;REV__Q386U3	Tb927.6.5070		Uncharacterized protein	2.04821
P30615;Q388I8	Tb427.10.14140	PYK1	Pyruvate kinase 1	2.03529
Q581A7	Tb927.8.3870	NOP127	Nucleolar protein 127	2.03303	Previous IDs: Tb08.10J17.380
Q383K3	Tb927.11.10760	KIN-D	kinesin-D	2.01364	Previous IDs: Tb11.01.2530;Tb11.01.2530:mRNA;Tb11.01.2530:pep
Q4GYQ5	TB927.1.3180		40S ribosomal protein S11, putative	2.01264
Q383V3	Tb927.11.9760		hypothetical protein, conserved	2.00896	Previous IDs: Tb11.01.1510;Tb11.01.1510:mRNA;Tb11.01.1510:pep
Q386L1	Tb927.11.3000;Tb927.9.9210		60S ribosomal protein L37, putative	1.98651	Previous IDs: 229.t01422;Tb11.02.0500;Tb09.211.0865;Tb09.211.0865:mRNA;Tb09.211.0865:pep;Tb11.02.0500:mRNA;Tb11.02.0500:pep
Q582N2;P49669	Tb927.3.5050		60S ribosomal protein L4	1.96544
Q587C5	Tb927.6.4590		Glutamyl-tRNA synthetase, putative	1.94883
Q584G9	Tb427.04.2180		60S ribosomal protein L35a, putative	1.93696	Previous IDs: Tb427tmp.1H19.150;current=false
Q585G9	Tb927.2.1080	RHS5	retrotransposon hot spot protein 5 (RHS5), putative	1.92435
Q57VP3;P17959	Tb10.70.1380		40S ribosomal protein S9, putative	1.9186
Q386L6	Tb927.11.2950	NUP89	Nucleoporin NUP89	1.91664	Previous IDs: Tb11.02.0460;Tb11.02.0460:mRNA;Tb11.02.0460:pep
Q586C2	Tb927.10.15120;Tb927.2.5910		40S ribosomal protein S13, putative	1.88062	Previous IDs: TRYP_x-61h03.q2kb185_209;Tb10.61.1390
Q38AC1	Tb927.10.8430		40S ribosomal protein S12, putative	1.85772	Previous IDs: TRYPtp6k15-3d06.p1c_305;Tb10.6k15.2050
Q57XN7	Tb427.07.2340;Tb427.07.2370		40S ribosomal protein S15, putative	1.85239	Previous IDs: Tb427tmp.22O10.320;Tb427tmp.22O10.360;current=false
Q57UT0	Tb927.4.450		Coatomer subunit alpha	1.85144
Q57UZ7	Tb927.8.4540		Uncharacterized protein	1.84818
Q586R7;Q26692	Tb927.2.4710		RNA-binding protein, putative	1.83835
Q583K7	Tb427.04.1860		ribosomal protein S19, putative	1.79901	Previous IDs: Tb427tmp.29M18.160;current=false
Q38EN1	Tb927.9.7110		GRAM domain containing protein, putative	1.7862	Previous IDs: Tb09.160.5200;Tb09.160.5200:mRNA;Tb09.160.5200:pep;Tb927.9.7130;Tb927.9.7130:mRNA;Tb927.9.7130:pep;chr9contig160.tmp0406
Q581V1	Tb927.4.1300	CAP42	Cytoskeleton-associated protein 42 kDa	1.78447	Previous IDs: Tb04.2L9.440
Q382W0	Tb927.11.12210		Domain of unknown function (DUF4586), putative	1.78307	Previous IDs: Tb11.01.4030;Tb11.01.4030:mRNA;Tb11.01.4030:pep
Q38EX6	Tb927.9.5900	GDH	glutamate dehydrogenase	1.77389	Previous IDs: Tb09.160.4310;Tb09.160.4310:mRNA;Tb09.160.4310:pep;chr9contig160.tmp0326
Q57VB7	Tb927.5.1460		Possible lysine decarboxylase, putative	1.76874	Previous IDs: Tb05.30H13.580
Q38D21	Tb09.211.4890		Casein kinase II, putative	1.76809
Q57XR1	Tb927.7.6910		Uncharacterized protein	1.75396
P86939;P86934;P86933	Tb10.70.5670		Elongation factor 1-alpha 2	1.74758
Q4GYY6	Tb427.01.2330;Tb427.01.2350;Tb427.01.2370;Tb427.01.2390		beta tubulin	1.74055
P50885	Tb427.10.9880;Tb427tmp.02.1840	RPL18;TbL18LP	60S ribosomal protein L18, putative	1.73887	Previous IDs: TRYP_xi-1013a02.q1k_74;TRYPtp6k15-3d06.p1c_64;Tb427tmp.6k15.0410;current=false
Q57UN6	Tb927.7.4060		Calpain-like cysteine peptidase, putative	1.72572
M4HZ01;Q580N4;Q580N3	Tb927.3.4080		Pyruvate transporter 0	1.70628
Q387H4	Tb927.11.760		protein phosphatase 2C, putative	1.69709	Previous IDs: Tb11.03.0390;Tb11.03.0390:mRNA;Tb11.03.0390:pep
Q586M2	Tb927.2.2510		Uncharacterized protein	1.69364
Q9NJP9;Q38DF2;Q38DE9;Q38DF3;Q38DF0	Tb927.9.12590;Tb927.9.12630	glk1	glycerol kinase, glycosomal	1.69341	Previous IDs: Tb09.211.3560;Tb09.211.3590;Tb09.211.3560:mRNA;Tb09.211.3560:pep;Tb09.211.3590:mRNA;Tb09.211.3590:pep;chr9contig211.tmp0399;chr9contig211.tmp0402
Q585H2	Tb927.2.1210		Retrotransposon hot spot (RHS) protein, putative	1.69236
Q582R3	Tb927.3.4720	DLP1	dynamin-like protein 1	1.66918	Previous IDs: Tb03.48K5.290
Q580A3	Tb427.04.750		50S ribosomal protein L7Ae, putative	1.66652	Previous IDs: Tb427tmp.5E12.940;current=false
Q38BW4	Tb10.70.4840		Uncharacterized protein	1.65983
Q57WF9	Tb927.7.3440	CAP27	Cytoskeleton-associated protein 27 kDa	1.65907	Previous IDs: Tb07.28B13.630
Q38F93	Tb09.160.3090		Heat shock protein, putative	1.65679
Q57V54;Q57V55	Tb927.3.3320		60S ribosomal protein L13	1.64939
Q57WH0	Tb927.7.3550	WCB	cytoskeleton associated protein, putative	1.63504	Previous IDs: Tb07.28B13.500
Q381R2	Tb927.11.15230		cytosolic coat protein, putative	1.63254	Previous IDs: Tb11.01.6880;Tb11.01.6880:mRNA;Tb11.01.6880:pep
Q386W9	Tb927.11.1900		T-complex protein 1, beta subunit, putative	1.62084	Previous IDs: Tb11.42.0003;Tb11.42.0003:mRNA;Tb11.42.0003:pep
Q57YK4;Q38D53	Tb927.8.6030		60S ribosomal protein L12, putative	1.6185
Q4FKG9;P19800	Tb11.0290		40S ribosomal protein S14	1.61384
Q4GYY5	Tb427.01.2340;Tb427.01.2360;Tb427.01.2380;Tb427.01.2400		alpha tubulin	1.60613
Q382M7;Q382L7	Tb11.01.4660		Elongation factor 1 gamma, putative	1.60439
Q57XK6	Tb927.3.3560		U-box domain containing protein, putative	1.59785	Previous IDs: Tb03.25B21.20
M1E1E8			Ribosomal protein s29, putative	1.59537
Q389U0	Tb927.10.10290		hypothetical protein, conserved	1.59343	Previous IDs: Tb10.406.0640
Q57XZ3	Tb927.4.3890		ATP-dependent RNA helicase, putative	1.58036	Previous IDs: Tb04.1D20.850
Q38CI6	Tb11.v5.0414;Tb927.10.540	SUB2	ATP-dependent DEAD/H RNA helicase, putative;ATP-dependent RNA helicase SUB2, putative	1.58027	Previous IDs: TRYP_x-70a06.p2kb545_1067;Tb10.70.7730
Q57VR7	Tb927.7.710		Heat shock 70 kDa protein, putative	1.58011
Q57YQ5;Q580Q1	Tb927.8.6980		Uncharacterized protein	1.57928
Q38BE4	Tb927.10.4560;Tb927.10.4570		elongation factor 2	1.57294	Previous IDs: TRYP_x-70a06.p2kb545_355;TRYP_x-70a06.p2kb545_357;Tb10.70.2650;Tb10.70.2660
Q387H6	Tb927.11.740	EIF5A	eukaryotic translation initiation factor 5A	1.55018	Previous IDs: Tb11.03.0410;Tb11.03.0410:mRNA;Tb11.03.0410:pep
B5LEK4;B5LEL2;B3GVR7;B3GVQ8;B3GVP7;B3GVN9;G1CRP2;B5LEJ5;Q8I8G5;Q8I8G4			ESAG6 type 13 (Fragment)	1.54245
Q585V4	Tb927.2.5160		Chaperone protein DnaJ, putative	1.53747
Q57VT4	Tb427.07.880	RPB25	RNA-binding protein, putative	1.5311	Previous IDs: Tb427tmp.29K4.370;current=false
Q384Q5	Tb927.11.7460;Tb927.11.7510	BiP	luminal binding protein 1 (BiP), putative	1.53014	Previous IDs: Tb11.02.5450;Tb11.02.5500;Tb11.02.5450:mRNA;Tb11.02.5450:pep;Tb11.02.5500:mRNA;Tb11.02.5500:pep
Q57ZM3	Tb427.03.2890		radial spoke protein RSP10, putative	1.52587	Previous IDs: Tb427tmp.27C5.280;current=false
Q580N5	Tb427.03.4070		hypothetical protein, conserved	1.51369	Previous IDs: Tb427tmp.26J7.120;current=false
Q383E1;P69103	Tb11.01.3170		Guanine nucleotide-binding protein beta subunit-like protein	1.5043
Q867U7;Q384T0	Tb927.11.7350	H2BV	Histone H2B variant V	1.50415	Previous IDs: Tb11.02.5250;Tb11.02.5250:mRNA;Tb11.02.5250:pep
Q383X0	Tb927.11.9590		S-adenosylhomocysteine hydrolase, putative	1.49162	Previous IDs: Tb11.01.1350;Tb11.01.1350:mRNA;Tb11.01.1350:pep
Q386I3	Tb927.11.3280	KIN13-5	Kinesin-13 5, putative	1.48722	Previous IDs: Tb11.02.0790;Tb11.02.0790:mRNA;Tb11.02.0790:pep
D7SGA2;Q57UU9;Q57UU8;Q57UU7;Q57UU6;Q57UU5	Tb927.2.340		Retrotransposon hot spot (RHS) protein, putative	1.47494
Q586V2;P13735	Tb927.2.4210		Glycosomal phosphoenolpyruvate carboxykinase	1.46785
Q57XK9	Tb927.7.2650	CAP51V	Cytoskeleton associated protein 51V	1.46497	Previous IDs: Tb07.22O10.860
Q57W54	Tb927.5.1090		Threonyl-tRNA synthetase, putative	1.45793
Q386P9	Tb927.11.2610	CAP50	Cytoskeleton-associated protein 50 kDa	1.45636	Previous IDs: Tb11.02.0210;Tb11.02.0210:mRNA;Tb11.02.0210:pep
Q382C8	Tb927.11.14090	DRBD18	Double RNA binding domain protein 18	1.43	Previous IDs: Tb11.01.5680;Tb11.01.5680:mRNA;Tb11.01.5680:pep
P50098			Inosine-5-monophosphate dehydrogenase	1.42092
Q8IFI2	Tb927.1.180	RHS1	retrotransposon hot spot protein 1 (RHS1), putative	1.41494
Q38CF6	Tb927.10.840	FAZ6	Flagellum attachment zone protein 6	1.40113	Previous IDs: TRYP_x-70a06.p2kb545_1007;Tb10.70.7320
Q57ZI7	Tb427.07.5000;Tb427.07.5020		60S ribosomal protein L19, putative	1.38558	Previous IDs: Tb427tmp.27E10.170;Tb427tmp.27E10.210;current=false
D6XM23	Tb927.8.6390	APT-L	acyl-protein thioesterase-like	1.38322	Previous IDs: Tb08.11J15.160
Q4GYC9	Tb927.1.4490	NAT2	N-acetyltransferase 2, putative	1.38298
Q57V18	Tb927.7.1920		Leucine-rich repeat protein (LRRP), putative	1.38199
Q387N9	Tb927.10.14790		metallo-peptidase, Clan MG, Family M24	1.37859	Previous IDs: TRYP_x-61h03.q2kb185_281;Tb10.61.1870
Q57VS2	Tb427.07.760		hypothetical protein, conserved	1.37688	Previous IDs: Tb427tmp.29K4.550;current=false
Q38AV5;Q37683	Tb10.70.0280		Chaperonin Hsp60, mitochondrial	1.37225
Q38FX4	Tb927.9.1750		Fibronectin type III domain containing protein, putative	1.36465	Previous IDs: Tb09.160.0650;Tb09.160.0650:mRNA;Tb09.160.0650:pep;chr9contig160.tmp0065c
Q57YA8;Q57YB2	Tb927.7.2980		Uncharacterized protein	1.36432
Q57U48	Tb927.8.7970		Uncharacterized protein	1.36181
Q383Y7	Tb927.11.9420		ATP synthase, putative	1.36138	Previous IDs: Tb11.01.1190;Tb11.01.1190:mRNA;Tb11.01.1190:pep
Q57Z31	Tb927.5.4170		Histone H4	1.35255
Q582M3	Tb427.07.6360	h2aZ	histone H2A variant	1.35187	Previous IDs: Tb427tmp.33N13.260;current=false
Q38F76	Tb927.9.4680	EIF4A1	Eukaryotic initiation factor 4A-1	1.34714	Previous IDs: Tb09.160.3270;Tb09.160.3270:mRNA;Tb09.160.3270:pep;chr9contig160.tmp0259
Q586B8;P31543	Tb927.2.5980		ATP-dependent Clp protease subunit, heat shock protein 100 (HSP100), putative	1.3384
Q4GYZ8	Tb927.1.2230	SMP1-1	small myristoylated protein 1-1, Small kinetoplastid calpain-related protein 1-6	1.33176
Q38DE8	Tb927.9.12650	UBA1b	ubiquitin-activating enzyme E1, putative	1.33095	Previous IDs: Tb09.211.3610;Tb09.211.3610:mRNA;Tb09.211.3610:pep;chr9contig211.tmp0404
Q38F34	Tb09.160.3710		Proliferating cell nuclear antigen	1.33052
Q384L3	Tb927.11.8060		SNARE associated Golgi protein, putative	1.32639	Previous IDs: Tb11.01.0480;Tb11.01.0480:mRNA;Tb11.01.0480:pep
Q57U85	Tb927.5.3810		Orotidine-5-phosphate decarboxylase/orotate phosphoribosyltransferase, putative	1.319
Q389T1;Q389S5;Q389S0	Tb10.406.0330		Histone H2B	1.31754
Q386P5	Tb927.11.2650	TRAP1	heat shock protein 84, putative	1.3164	Previous IDs: Tb11.02.0250;Tb11.02.0250:mRNA;Tb11.02.0250:pep
Q586B2	Tb427.06.4140	PFC4	paraflagellar rod component, putative	1.30137	Previous IDs: Tb427tmp.4F7.140;current=false

## Sheet: SuppFile1h_NonR-TALEvIngiR-TALE
UniProt ID	TriTryp ID	NAME	DESCRIPTION	-Log Student's T-test p-value NO-REPEAT-TALE_INGI-TALE	Previous ID(s)
Q388Z2	Tb927.10.12510		P-type H+-ATPase, putative	5.72521	Previous IDs: Tb10.389.1170
Q386V3	Tb927.11.2050;Tb927.11.2060		60S acidic ribosomal protein P0, putative	5.50161	Previous IDs: Tb11.46.0001;Tb11.46.0002;Tb11.46.0001:mRNA;Tb11.46.0001:pep;Tb11.46.0002:mRNA;Tb11.46.0002:pep
Q585Y5	Tb927.6.3870	SGN1	RNA-binding protein RBP14, putative	5.16121
Q38DN0	Tb927.9.11600	GIM5B	glycosomal membrane protein	5.14354	Previous IDs: Tb09.211.2740;Tb09.211.2740:mRNA;Tb09.211.2740:pep;chr9contig211.tmp0313
Q383X6	Tb927.11.9530	14-3-3-I	14-3-3 protein 1	5.06303	Previous IDs: Tb11.01.1290;Tb11.01.1290:mRNA;Tb11.01.1290:pep
Q38E94;P12432;P12433	Tb09.211.0620		Actin A	4.53555
Q585V4	Tb927.2.5160	J2	Chaperone protein DnaJ, putative	4.42053
Q389Z6	Tb927.10.9800		60S ribosomal protein L22	4.39143	Previous IDs: TRYPtp6k15-3d06.p1c_76;Tb10.6k15.0510
Q582T6	Tb427.03.2230		succinyl-CoA synthetase alpha subunit, putative	4.37194	Previous IDs: Tb427tmp.48O8.710;current=false
Q383E1;P69103	Tb11.01.3170		Guanine nucleotide-binding protein beta subunit-like protein	4.35649
Q381B0	Tb11.01.8510		T-complex protein 1, alpha subunit, putative	4.28165
Q57W25;B9VVJ6;Q57W24;B9VVJ7	Tb927.5.800		Casein kinase, putative	4.25426
Q388M1;Q57XN2	Tb927.7.2420	GSK3A	glycogen synthase kinase-3 alpha, putative	4.18989	Previous IDs: Tb07.22O10.450
D6XMQ7	Tb927.8.890	Rab1A	Ras-related protein Rab1A	4.14819	Previous IDs: Tb08.12O16.530
O15883;Q38DN9	Tb927.9.11470;Tb927.9.11490	RPL27A	60S ribosomal protein L28, 60S ribosomal protein L27a, 60S ribosomal protein L29	4.1333	Previous IDs: Tb09.211.2650;Tb09.v1.0640;Tb09.211.2650:mRNA;Tb09.211.2650:pep;Tb09.v1.0640:mRNA;Tb09.v1.0640:pep;chr9contig211.tmp0303
Q9NDH8;Q38BV6	Tb10.70.4740		Enolase	4.12818
Q38BS1	Tb10.70.4200		Fatty acyl CoA synthetase, putative	4.12006
Q38DF6	Tb927.9.12510	DED1	ATP-dependent DEAD/H RNA helicase, putative	4.11583	Previous IDs: Tb09.211.3510;Tb09.211.3510:mRNA;Tb09.211.3510:pep;chr9contig211.tmp0394
Q38AE1;P12865	Tb10.6k15.2290		Protein disulfide isomerase	4.03104
Q389E9	Tb927.10.11930		beta-D-hydroxybutyrate dehydrogenase	4.00579	Previous IDs: Tb10.389.1850
Q580H2	Tb927.8.1510	DBP2B	ATP-dependent RNA helicase DBP2B, putative	4.00411	Previous IDs: Tb08.29O9.160
Q38B66;Q38B67	Tb10.70.1670		40S ribosomal protein S10, putative	3.96946
Q385E6	Tb927.11.6230		protein transport protein SEC61 subunit alpha, putative	3.95719	Previous IDs: Tb11.02.4100;Tb11.02.4100:mRNA;Tb11.02.4100:pep
Q57YF6	Tb927.8.750	NOPP44/46-2	nucleolar RNA-binding protein, putative	3.95486	Previous IDs: Tb08.12O16.320
Q38C20	Tb927.10.2240		RNA binding protein	3.95092	Previous IDs: TRYP_x-70a06.p2kb545_749;Tb10.70.5500
Q57ZC9	Tb427.03.1820		hypothetical protein, conserved	3.84202	Previous IDs: Tb427tmp.30P12.500;current=false
Q57UQ9	Tb927.7.4290	NUDC1	Nuclear distribution protein C homolog	3.83219
Q57US8	Tb427.04.470		snoRNP protein GAR1, putative	3.83143	Previous IDs: Tb427tmp.5D20.620;current=false
Q382F9;Q26734	Tb11.01.5350		Profilin	3.81677
Q585J5	Tb427.04.3550;Tb427.05.1610		60S ribosomal protein L13a, putative	3.80783	Previous IDs: Tb427tmp.26G5.360;Tb427tmp.30H13.890;current=false
Q582N2;P49669	Tb927.3.5050		60S ribosomal protein L4	3.80521
Q38CX3	Tb09.244.2630		40S ribosomal protein S6	3.77916
Q585J1;Q585J3	Tb927.4.3590		Translation elongation factor 1-beta, putative	3.76741
Q38DY5	Tb927.9.10230	P23	Co-chaperone protein P23	3.76305	Previous IDs: Tb09.211.1690;Tb09.211.1690:mRNA;Tb09.211.1690:pep;chr9contig211.tmp0200c
Q57YA8;Q57YB2	Tb927.7.2980		Nitroreductase family, putative	3.74461
Q38CJ9	Tb927.10.390		DUF2407 ubiquitin-like domain containing protein, putative	3.7098	Previous IDs: TRYP_x-70a06.p2kb545_1092;Tb10.70.7950
Q57XD5	Tb927.8.2540	SCP2	3-ketoacyl-CoA thiolase	3.66402	Previous IDs: Tb08.26A17.500
Q381H3	Tb927.11.16130	NDPK	nucleoside diphosphate kinase	3.66161	Previous IDs: Tb11.01.7800;Tb11.01.7800:mRNA;Tb11.01.7800:pep
Q383X0	Tb927.11.9590		S-adenosylhomocysteine hydrolase, putative	3.63102	Previous IDs: Tb11.01.1350;Tb11.01.1350:mRNA;Tb11.01.1350:pep
Q57V54;Q57V55	Tb927.3.3320		60S ribosomal protein L13	3.61835
Q38AV5;Q37683	Tb10.70.0280		Chaperonin Hsp60, mitochondrial	3.61691
Q57XJ5	Tb927.3.3450	ARL3A	ADP-ribosylation factor-like protein 3, putative	3.60968	Previous IDs: Tb03.25B21.123
Q387E8	Tb927.11.1020		ribokinase, putative	3.60437	Previous IDs: Tb11.03.0090;Tb11.03.0090:mRNA;Tb11.03.0090:pep
Q9NJP9;Q38DF2;Q38DE9;Q38DF3;Q38DF0	Tb927.9.12590;Tb927.9.12630	glk1	glycerol kinase, glycosomal	3.60336	Previous IDs: Tb09.211.3560;Tb09.211.3590;Tb09.211.3560:mRNA;Tb09.211.3560:pep;Tb09.211.3590:mRNA;Tb09.211.3590:pep;chr9contig211.tmp0399;chr9contig211.tmp0402
Q38FF6	Tb927.9.3770		hypothetical protein, conserved	3.60114	Previous IDs: Tb09.160.2370;Tb09.160.2370:mRNA;Tb09.160.2370:pep;chr9contig160.tmp0203
Q386I1	Tb927.11.3300	SAS-4	Spindle assembly abnormal 4	3.59861	Previous IDs: Tb11.02.0810;Tb11.02.0810:mRNA;Tb11.02.0810:pep
Q57VM1	Tb427.08.1330;Tb427.08.1340		60S ribosomal protein L7a, putative	3.59511	Previous IDs: Tb427tmp.29O4.580;Tb427tmp.29O4.590;current=false
Q585G9	Tb927.2.1080	RHS5	retrotransposon hot spot protein 5 (RHS5), putative	3.5884
Q388D3	Tb927.10.14600;Tb927.10.14710	RPS2	40S ribosomal protein S2, putative	3.5538	Previous IDs: TRYP_x-61h03.q2kb185_295;TRYP_x-61h03.q2kb185_310;Tb10.61.1960;Tb10.61.2070
Q382M7;Q382L7	Tb11.01.4660		Elongation factor 1 gamma, putative	3.52534
Q386P5	Tb927.11.2650	TRAP1	heat shock protein 84, putative	3.5233	Previous IDs: Tb11.02.0250;Tb11.02.0250:mRNA;Tb11.02.0250:pep
Q57UP8	Tb927.7.4180		Elongation of fatty acids protein	3.49499
Q584G9	Tb427.04.2180		60S ribosomal protein L35a, putative	3.48221	Previous IDs: Tb427tmp.1H19.150;current=false
Q57TY3	Tb927.7.7460	Z41AP	ZC3H41-associated protein	3.47271	Previous IDs: Tb07.30D13.320
Q38EU9	Tb927.9.6290	AK1	arginine kinase	3.46666	Previous IDs: Tb09.160.4590;Tb09.160.4590:mRNA;Tb09.160.4590:pep;chr9contig160.tmp0345
Q584T9	Tb927.6.2170	MGE1	co-chaperone GrpE, putative	3.46495	Previous IDs: Tb06.4M18.480
Q382C8	Tb927.11.14090	DRBD18	Double RNA binding domain protein 18	3.44395	Previous IDs: Tb11.01.5680;Tb11.01.5680:mRNA;Tb11.01.5680:pep
Q381R2	Tb927.11.15230		cytosolic coat protein, putative	3.42241	Previous IDs: Tb11.01.6880;Tb11.01.6880:mRNA;Tb11.01.6880:pep
Q585Y2	Tb927.6.3840		reticulon domain protein	3.40723	Previous IDs: Tb06.4F7.620
Q57YU3	Tb927.8.7410		Calreticulin, putative	3.36473
Q384S7	Tb927.11.7380	G3PDH	glycerol-3-phosphate dehydrogenase (FAD-dependent), mitochondrial	3.36419	Previous IDs: Tb11.02.5280;Tb11.02.5280:mRNA;Tb11.02.5280:pep
Q57WD3	Tb927.3.3970		Cell growth-regulating nucleolar protein, putative	3.32836	Previous IDs: Tb03.28C22.230
Q584M6;Q8IFJ1	Tb927.2.510		Retrotransposon hot spot (RHS) protein, putative	3.30678
Q57YL2	Tb927.8.6110	HMGS	3-hydroxy-3-methylglutaryl-CoA synthase, putative	3.30595	Previous IDs: Tb08.11J15.640
Q385B8;Q385B9	Tb11.02.4360		40S ribosomal protein S21, putative	3.29461
Q381J6	Tb927.11.15880;Tb927.11.15900		60S ribosomal protein L27, putative	3.24552	Previous IDs: Tb11.01.7535;Tb11.01.7545;Tb11.01.7535:mRNA;Tb11.01.7535:pep;Tb11.01.7545:mRNA;Tb11.01.7545:pep
Q57ZQ1	Tb427.05.1820		60S acidic ribosomal protein, putative	3.23731	Previous IDs: Tb427tmp.1P6.710;current=false
Q383L0	Tb927.11.10690		hypothetical protein, conserved	3.23657	Previous IDs: Tb11.01.2460;Tb11.01.2460:mRNA;Tb11.01.2460:pep
P26331			Variant surface glycoprotein MITAT 1.1	3.23469
Q581Z5	Tb427.08.1870	tGLP1	Golgi/lysosome glycoprotein 1	3.22834	Previous IDs: Tb427tmp.26N11.310;current=false
Q38BE4	Tb927.10.4560;Tb927.10.4570		elongation factor 2	3.22325	Previous IDs: TRYP_x-70a06.p2kb545_355;TRYP_x-70a06.p2kb545_357;Tb10.70.2650;Tb10.70.2660
Q38B23	Tb927.10.5810		The ARF-like 2 binding protein BART, putative	3.21832	Previous IDs: TRYP_x-70a06.p2kb545_157;Tb10.70.1130
Q57ZI7	Tb427.07.5000;Tb427.07.5020		60S ribosomal protein L19, putative	3.21761	Previous IDs: Tb427tmp.27E10.170;Tb427tmp.27E10.210;current=false
Q384B1;A4URT2	Tb11.01.0910		DNA topoisomerase III, putative	3.15845
Q583T1;P55842;Q383F5	Tb927.6.720		40S ribosomal protein L14, putative	3.15468
Q385M4	Tb927.11.5440		NADP-dependent malic enzyme, cytosolic	3.13831	Previous IDs: Tb11.02.3120;Tb11.02.3120:mRNA;Tb11.02.3120:pep;Tb11.212.0950
Q582R3	Tb927.3.4720	DLP1	dynamin-like protein 1	3.12607	Previous IDs: Tb03.48K5.290
Q385D9	Tb927.11.6300		40S ribosomal protein S5, putative	3.11887	Previous IDs: Tb11.02.4170;Tb11.02.4170:mRNA;Tb11.02.4170:pep
Q57VW1	Tb927.5.520		Stomatin-like protein, putative	3.11704
Q382Y3	Tb927.11.11965;Tb927.11.11975;Tb927.11.11980	CAP15	cytoskeleton-associated protein 15;cytoskeleton-associated protein, putative	3.11165	Previous IDs: NCDS.Tb927.11.11965;NTCDS.Tb11.NT.142;Tb11.01.3805;Tb11.01.3805:mRNA;Tb11.01.3805:pep
Q581X8	Tb927.8.2040		Domain of unknown function (DUF1767), putative	3.10675	Previous IDs: Tb08.26N11.520
Q383E5;A0A0U2KFL3	Tb11.01.3110		Heat shock protein 70	3.10198
Q4FKA8	Tb11.1380;Tb927.11.1840	CAP46	Cytoskeleton-associated protein 46 kDa	3.08055	Previous IDs: Tb11.39.0004;Tb11.39.0004:mRNA;Tb11.39.0004:pep
Q389P1	Tb11.v5.0543;Tb927.10.10890;Tb927.10.10900;Tb927.10.10920;Tb927.10.10940;Tb927.10.10950;Tb927.10.10960		Heat shock protein 83, putative;heat shock protein, putative	3.07784	Previous IDs: Tb10.329.0050;Tb10.329.0060;Tb10.329.0080;Tb10.329.0100;Tb10.329.0110;Tb10.329.0120
Q586M2	Tb927.2.2510		Uncharacterized protein	3.0503
Q38CZ1	Tb927.9.15090		cytosolic coat protein, putative	3.02352	Previous IDs: Tb09.244.2760;Tb09.244.2760:mRNA;Tb09.244.2760:pep;chr9contig244a01.tmp0276
Q57WR6	Tb927.7.1320		10 kDa heat shock protein, putative	3.01003
Q386I7	Tb927.11.3240	TCP-1-zeta	T-complex protein 1, zeta subunit, putative	2.98544	Previous IDs: Tb11.02.0750;Tb11.02.0750:mRNA;Tb11.02.0750:pep
Q4FKN8;Q4FKN7	Tb10.v4.0052		Microtubule-associated protein 2 (Fragment)	2.98413
Q38B01	Tb927.10.6050	CHC	clathrin heavy chain	2.98365	Previous IDs: TRYP_x-70a06.p2kb545_120;Tb10.70.0830;embl.373
Q57YL6	Tb427.08.6150;Tb427.08.6160		40S ribosomal protein S8, putative	2.96783	Previous IDs: Tb427tmp.11J15.560;Tb427tmp.11J15.570;current=false
Q57V37;Q57V35	Tb927.7.1730		60S ribosomal protein L7, putative	2.96671
Q38BY1	Tb10.70.5020		Uncharacterized protein	2.95937
Q6ZXT2		aqp3	Aquaglyceroporin 3	2.9538
Q38BK6;Q38BK7	Tb10.70.3360		40S ribosomal protein S3a	2.93105
Q584M8	Tb927.2.450	RHS4	retrotransposon hot spot protein 4 (RHS4), putative	2.92298
Q382C4	Tb927.10.3840;Tb927.11.14130		60S ribosomal protein L18a, putative;ribosomal protein L18, putative	2.92248	Previous IDs: TRYP_x-70a06.p2kb545_470;Tb11.01.5720;Tb10.70.3510;Tb11.01.5720:mRNA;Tb11.01.5720:pep
Q586Z8	Tb427.06.4320		hypothetical protein, conserved	2.90038	Previous IDs: Tb427tmp.26G9.1010;current=false
Q38CI6	Tb11.v5.0414;Tb927.10.540	SUB2	ATP-dependent DEAD/H RNA helicase, putative;ATP-dependent RNA helicase SUB2, putative	2.89892	Previous IDs: TRYP_x-70a06.p2kb545_1067;Tb10.70.7730
Q384Q5	Tb927.11.7460;Tb927.11.7510	BiP	luminal binding protein 1 (BiP), putative	2.88851	Previous IDs: Tb11.02.5450;Tb11.02.5500;Tb11.02.5450:mRNA;Tb11.02.5450:pep;Tb11.02.5500:mRNA;Tb11.02.5500:pep
Q57WZ3	Tb427.03.1120	rtb2	GTP-binding nuclear protein rtb2, putative	2.86918	Previous IDs: Tb427tmp.27F10.90;current=false
Q38C42;A0A3G1VTN5	Tb10.70.5820		Phosphotransferase	2.86901
Q38B20	Tb927.10.5840		translation elongation factor 1-beta, putative	2.86432	Previous IDs: TRYP_x-70a06.p2kb545_154;Tb10.70.1100
Q388D4	Tb927.10.14700		hypothetical protein, conserved	2.85807	Previous IDs: TRYP_x-61h03.q2kb185_296;Tb10.61.1970
Q57WH0	Tb927.7.3550	WCB	cytoskeleton associated protein, putative	2.85253	Previous IDs: Tb07.28B13.500
Q38F76	Tb927.9.4680	EIF4A1	Eukaryotic initiation factor 4A-1	2.82031	Previous IDs: Tb09.160.3270;Tb09.160.3270:mRNA;Tb09.160.3270:pep;chr9contig160.tmp0259
Q382C7	Tb927.11.14100	DRBD4	Double RNA-binding domain containing protein 4	2.79909	Previous IDs: Tb11.01.5690;Tb11.01.5690:mRNA;Tb11.01.5690:pep
Q57Z55	Tb927.5.3400		Calcium-transporting ATPase	2.79204
Q57V53	Tb927.3.3330	HSP20	heat shock protein 20, putative	2.77103	Previous IDs: Tb03.3K10.400
Q4FKD8	Tb11.0845;Tb927.11.18680;Tb927.11.715	DYNLL1;DYNLL2	chrXI additional, unordered contigs, dynein light chain LC8, putative;dynein light chain LC8, putative	2.76517	Previous IDs: NCDS.Tb927.11.711;Tb11.50.0007;Tb11.50.0007:mRNA;Tb11.50.0007:pep;Tb927.11.711
Q94774;Q387G2	Tb927.11.880	CYPA	cyclophilin a	2.76285	Previous IDs: Tb11.03.0250;Tb11.03.0250:mRNA;Tb11.03.0250:pep
Q585X3	Tb927.6.3740		Heat shock 70 kDa protein, mitochondrial, putative	2.75602
Q4GYZ5	Tb927.1.2260	SMP1-2	small myristoylated protein 1-2	2.74998
Q3S1K6;Q38DS4	Tb927.9.11000	RAB7	ras-related protein RAB7, putative	2.73863	Previous IDs: Tb09.211.2330;Tb09.211.2330:mRNA;Tb09.211.2330:pep;chr9contig211.tmp0269c
Q38FS0	Tb09.160.1160	NOP86	nucleolar protein	2.73305
Q383S6	Tb927.11.10025;Tb927.11.10030		60S ribosomal protein L29, putative	2.71682	Previous IDs: NTCDS.Tb11.NT.118;Tb11.01.1790;Tb11.01.1790:mRNA;Tb11.01.1790:pep;Tb11.NT.118_2
Q57X54	Tb427.05.4500	TbSAR1	ras-like small GTPase, putative	2.69801	Previous IDs: Tb427tmp.26C7.80;current=false
Q38AE5	Tb927.10.8190		T-complex protein 1, theta subunit, putative	2.6755	Previous IDs: TRYPtp6k15-3d06.p1c_341;Tb10.6k15.2330
Q587E3	Tb927.6.4770	MKT1	Uncharacterized protein	2.67059
Q57UX1	Tb927.8.4810		Prohibitin	2.66268
Q57WF6	Tb927.7.3410	Centrin4	centrin-4	2.64145	Previous IDs: Tb07.28B13.660
Q587H4	Tb927.2.2770		hypothetical protein, conserved	2.63073
Q38EX6	Tb927.9.5900	GDH	glutamate dehydrogenase	2.63034	Previous IDs: Tb09.160.4310;Tb09.160.4310:mRNA;Tb09.160.4310:pep;chr9contig160.tmp0326
Q38CD4	Tb927.10.1060	TCP-1-delta	T-complex protein 1, delta subunit, putative	2.62113	Previous IDs: TRYP_x-70a06.p2kb545_973;Tb10.70.7050
Q385C5	Tb927.11.6440	ENF	Essential Nuclear Factor, 49 kDa	2.60521	Previous IDs: Tb11.02.4300;Tb11.02.4300:mRNA;Tb11.02.4300:pep
Q587B0	Tb927.6.4440	RBP42	RNA-binding protein 42 (RNA-binding motif protein 42)	2.60436	Previous IDs: Tb06.26G9.840
Q383N6	Tb927.11.10430		dynein regulatory complex protein 9, putative	2.59042	Previous IDs: Tb11.01.2200;Tb11.01.2200:mRNA;Tb11.01.2200:pep
Q583S0	Tb927.6.2640	KAP60	importin alpha subunit, putative	2.58847	Previous IDs: Tb06.5F5.40
Q587B6	Tb927.6.4500		Uncharacterized protein	2.58645
Q57WZ2	Tb427.03.1110	PIFTA1	flagellar transport protein, putative	2.57773	Previous IDs: Tb427tmp.27F10.120;current=false
Q387T8	Tb927.10.15760	CAP36	Cytoskeleton-associated protein 36 kDa	2.56507	Previous IDs: TRYP_x-61h03.q2kb185_87;Tb10.61.0540
Q583I9	Tb427.04.2040	ALBA3	hypothetical protein, conserved	2.56164	Previous IDs: Tb427tmp.29M18.710;current=false
Q388R1	Tb927.10.13360	EF-Tu	Elongation factor Tu, mitochondrial	2.55941	Previous IDs: Tb10.389.0070
Q38F93	Tb09.160.3090		Heat shock protein, putative	2.55112
Q57UN6	Tb927.7.4060		Calpain-like cysteine peptidase, putative	2.54174
Q580S6	Tb427.03.5490	PIFTB2	flagellar transport protein, putative	2.53459	Previous IDs: Tb427tmp.5L5.700;current=false
Q38E16	Tb09.211.1390		Uncharacterized protein	2.53457
Q382Z8	Tb927.11.11820;Tb927.11.11830		40S ribosomal protein S17, putative	2.52625	Previous IDs: 237.t00946;237.t00947;Tb11.01.3675;Tb11.01.3675:mRNA;Tb11.01.3675:pep;Tb11.01.3676;Tb11.01.3676:mRNA;Tb11.01.3676:pep
Q57UW3	Tb927.8.4890		Endoplasmic reticulum oxidoreductin, putative	2.52598
Q388X5;Q383V6	Tb10.389.0910		60S ribosomal protein L34, putative	2.50704
Q586Z6;Q586Z5;A0A0M4HMZ4	Tb927.6.4300		Glyceraldehyde-3-phosphate dehydrogenase	2.50661
Q57YR7	Tb927.8.7100		Acetyl-CoA carboxylase, putative	2.49641
Q38D64;Q38D65	Tb09.211.4470		ADP-ribosylation factor, putative	2.49471
Q389I7;Q38EW1	Tb10.26.0370		40S ribosomal protein S3, putative	2.49309
Q581Q1;Q581Q2	Tb927.4.1800		Ribosomal protein L3, mitochondrial, putative	2.48216
Q57WB4;Q57WB2;O77404	Tb927.3.3780		Tryparedoxin	2.45698
Q57YK4;Q38D53	Tb927.8.6030		60S ribosomal protein L12, putative	2.446
Q586R7;Q26692	Tb927.2.4710		RNA-binding protein, putative	2.44264
Q583M4	Tb927.6.3100	IFT46	Intraflagellar transport complex B protein 46 C terminal, putative	2.42207	Previous IDs: Tb06.5F5.860
Q57UL8;Q26678;Q57UL6;Q57X35;P17882	Tb927.8.5460		Flagellar calcium-binding protein TB-44A	2.41952
Q38DE8	Tb927.9.12650	UBA1b	ubiquitin-activating enzyme E1, putative	2.40409	Previous IDs: Tb09.211.3610;Tb09.211.3610:mRNA;Tb09.211.3610:pep;chr9contig211.tmp0404
Q57XG1;Q57XG2	Tb927.8.2260		Uncharacterized protein	2.40375
Q38EC5	Tb927.9.8070;Tb927.9.8420	QM	QM-like protein, 60S ribosomal protein L10, putative	2.40174	Previous IDs: Tb09.211.0110;Tb09.211.0340;Tb09.211.0110:mRNA;Tb09.211.0110:pep;Tb09.211.0340:mRNA;Tb09.211.0340:pep;chr9contig211.tmp0011c;chr9contig211.tmp0042c
Q389R7	Tb10.406.0290		Protein tyrosine phosphatase, putative	2.39824
Q38E83	Tb927.9.9060	LSM12	Lsm12 protein, putative	2.395	Previous IDs: Tb09.211.0740;Tb09.211.0740:mRNA;Tb09.211.0740:pep;chr9contig211.tmp0091c
Q383R3	Tb927.11.10160		60S ribosomal protein L22, putative	2.39402	Previous IDs: Tb11.01.1920;Tb11.01.1920:mRNA;Tb11.01.1920:pep
Q38AU2	Tb10.70.0120		COP-coated vesicle membrane protein erv25, putative	2.38242
Q386F2	Tb11.v5.1059;Tb927.11.3590;Tb927.11.3600		40S ribosomal protein S4, putative	2.36665	Previous IDs: Tb11.02.1085;Tb11.02.1090;Tb11.02.1085:mRNA;Tb11.02.1085:pep;Tb11.02.1090:mRNA;Tb11.02.1090:pep
Q57VE2	Tb427.05.1210		short-chain dehydrogenase, putative	2.36528	Previous IDs: Tb427tmp.30H13.140;current=false
Q381R1	Tb927.11.15240	RAB2B	Ras-related protein RAB2B, putative	2.36402	Previous IDs: Tb11.01.6890;Tb11.01.6890:mRNA;Tb11.01.6890:pep
Q38DH8	Tb927.9.12200;Tb927.9.12240		60S ribosomal subunit protein L31, putative	2.36204	Previous IDs: Tb09.211.3270;Tb09.211.3280;Tb09.211.3270:mRNA;Tb09.211.3270:pep;Tb09.211.3280:mRNA;Tb09.211.3280:pep;chr9contig211.tmp0370;chr9contig211.tmp0371
Q8IFI8	Tb927.1.120	RHS4	retrotransposon hot spot protein 4 (RHS4), putative	2.35338
Q387H6	Tb927.11.740	EIF5A	eukaryotic translation initiation factor 5A	2.35337	Previous IDs: Tb11.03.0410;Tb11.03.0410:mRNA;Tb11.03.0410:pep
Q388W2	Tb927.10.12840	MCP12	mitochondrial carrier protein	2.34487	Previous IDs: Tb10.389.0690
Q386P9	Tb927.11.2610	CAP50	Cytoskeleton-associated protein 50 kDa	2.33161	Previous IDs: Tb11.02.0210;Tb11.02.0210:mRNA;Tb11.02.0210:pep
Q38AC1	Tb927.10.8430		40S ribosomal protein S12, putative	2.31683	Previous IDs: TRYPtp6k15-3d06.p1c_305;Tb10.6k15.2050
Q386T4	Tb927.11.2250		conserved protein, unknown function	2.30937	Previous IDs: Tb11.18.0005;Tb11.18.0005:mRNA;Tb11.18.0005:pep
Q4GYY6	Tb427.01.2330;Tb427.01.2350;Tb427.01.2370;Tb427.01.2390		beta tubulin	2.30062
Q583K7	Tb427.04.1860		ribosomal protein S19, putative	2.30034	Previous IDs: Tb427tmp.29M18.160;current=false
P30616		PYK2	Pyruvate kinase 2	2.28724
Q57X63	Tb927.7.4470		Uncharacterized protein	2.27477
Q57XK9	Tb927.7.2650	CAP51V	Cytoskeleton associated protein 51V	2.25143	Previous IDs: Tb07.22O10.860
Q4GYY5	Tb427.01.2340;Tb427.01.2360;Tb427.01.2380;Tb427.01.2400		alpha tubulin	2.2385
Q383K0;Q383I8	Tb11.01.2560		40S ribosomal protein SA	2.23787
Q57YZ8	Tb427.08.3150	TCP-1-gamma	T-complex protein 1, gamma subunit, putative	2.23652	Previous IDs: Tb427tmp.28L1.90;current=false
Q57WF9	Tb927.7.3440	CAP27	Cytoskeleton-associated protein 27 kDa	2.23299	Previous IDs: Tb07.28B13.630
P86939;P86934;P86933	Tb10.70.5670		Elongation factor 1-alpha 2	2.21393
Q57UZ7	Tb927.8.4540		Uncharacterized protein	2.21379
Q38C90	Tb10.70.6450		NOT1	2.20616
Q585H2	Tb927.2.1210		Retrotransposon hot spot (RHS) protein, putative	2.20331
Q385X1	Tb927.11.4460	ALBA1	ALBA-Domain Protein	2.19448	Previous IDs: TRYP_xi-1013a02.q1k_50;Tb11.02.2040;Tb11.02.2040:mRNA;Tb11.02.2040:pep
Q384D1	Tb927.11.8970		ribose 5-phosphate isomerase, putative	2.16055	Previous IDs: Tb11.01.0700;Tb11.01.0700:mRNA;Tb11.01.0700:pep
Q584M7	Tb927.2.470	RHS4	retrotransposon hot spot protein 4 (RHS4), putative	2.15496
Q38B00	Tb11.v5.0199;Tb927.10.6060	UMSBP2	universal minicircle sequence binding protein 2;universal minicircle sequence binding protein, putative	2.15195	Previous IDs: TRYP_x-70a06.p2kb545_119;Tb10.70.0820
Q388W4	Tb927.10.12820		hypothetical protein, conserved	2.14615	Previous IDs: Tb10.389.0720
Q381A3	Tb927.11.16830	RABL5	Rab-like 5, small G protein	2.14564	Previous IDs: Tb11.01.8590;Tb11.01.8590:mRNA;Tb11.01.8590:pep
Q38AM2	Tb10.6k15.3250		Succinate--CoA ligase [ADP-forming] subunit beta, mitochondrial	2.13399
Q57XQ5	Tb427.07.2190		hypothetical protein, conserved	2.12678	Previous IDs: Tb427tmp.22O10.120;current=false
Q388E8	Tb10.61.2130	HEL67	ATP-dependent RNA helicase HEL67	2.10557
Q382L3	Tb927.11.13230	VAP	VAMP-associated protein, putative	2.09981	Previous IDs: Tb11.01.4810;Tb11.01.4810:mRNA;Tb11.01.4810:pep
Q57Z07	Tb427.05.4420		nucleolar RNA helicase Gu, putative	2.07083	Previous IDs: Tb427tmp.45E22.770;current=false
Q388B7;REV__CON__Q497I4	Tb10.61.1750		Kinesin-like protein	2.06802
Q382D5;Q382D7	Tb11.01.5590	NRBD2	nuclear RNA-bindin domain 2	2.0593
Q38CW7	Tb09.244.2570		Calcium motive P-type ATPase, putative	2.05463
Q38FD9;Q38FE4	Tb09.160.2550		40S ribosomal protein S7	2.05117
Q382B2	Tb927.11.14250	TCP-1-epsilon	T-complex protein 1, epsilon subunit, putative	2.05016	Previous IDs: Tb11.01.5860;Tb11.01.5860:mRNA;Tb11.01.5860:pep
Q38DX9	Tb927.9.10310	MCP11	mitochondrial carrier protein 11	2.04824	Previous IDs: Tb09.211.1750;Tb09.211.1750:mRNA;Tb09.211.1750:pep;chr9contig211.tmp0206c
Q38EY6	Tb927.9.5690		60S acidic ribosomal protein, putative	2.04391	Previous IDs: Tb09.160.4200;Tb09.160.4200:mRNA;Tb09.160.4200:pep;chr9contig160.tmp0317
Q57VB7	Tb927.5.1460		Possible lysine decarboxylase, putative	2.0388	Previous IDs: Tb05.30H13.580
Q580N5	Tb427.03.4070		hypothetical protein, conserved	2.03426	Previous IDs: Tb427tmp.26J7.120;current=false
Q38DP9	Tb927.9.11270	TCP-1-eta	t- complex protein 1 (eta subunit), putative, T-complex protein 1, eta subunit, putative	2.0133	Previous IDs: Tb09.211.2570;Tb09.211.2570:mRNA;Tb09.211.2570:pep;chr9contig211.tmp0295
Q57U85	Tb927.5.3810		Orotidine-5-phosphate decarboxylase/orotate phosphoribosyltransferase, putative	2.01149
Q389K1	Tb927.10.11390		60S ribosomal protein L6, putative	1.99855	Previous IDs: Tb10.26.0560
B5LEK4;B5LEL2;B3GVR7;B3GVQ8;B3GVP7;B3GVN9;G1CRP2;B5LEJ5;Q8I8G5;Q8I8G4			ESAG6 type 13 (Fragment)	1.99772
Q57Y35	Tb927.4.4310	NUP64	Nucleoporin NUP64	1.99657	Previous IDs: Tb04.1D20.150
Q582M3	Tb427.07.6360	h2aZ	histone H2A variant	1.98417	Previous IDs: Tb427tmp.33N13.260;current=false
Q388V0	Tb927.10.12960	RAB5A	Ras-related protein Rab5A	1.98205	Previous IDs: Tb10.389.0550
Q8IFI2	Tb927.1.180	RHS1	retrotransposon hot spot protein 1 (RHS1), putative	1.96924
Q57UB5	Tb427.05.3510	SMC3	structural maintenance of chromosome 3 , putative	1.96233	Previous IDs: Tb427tmp.6E7.170;current=false
D6XLG8	Tb927.8.4330	RAB11	small GTP-binding protein Rab11	1.94947	Previous IDs: Tb08.29H22.590
Q380Y7;E7BBN6	Tb11.01.8770		Uncharacterized protein	1.94518
Q9N942	Tb927.1.420	RHS5	retrotransposon hot spot protein 5 (RHS5), putative	1.94377
Q386L1	Tb927.11.3000;Tb927.9.9210		60S ribosomal protein L37, putative	1.92207	Previous IDs: 229.t01422;Tb11.02.0500;Tb09.211.0865;Tb09.211.0865:mRNA;Tb09.211.0865:pep;Tb11.02.0500:mRNA;Tb11.02.0500:pep
P13377;Q6RZY0	Tb427.01.3830	PGI	Glucose-6-phosphate isomerase, glycosomal	1.9192
Q388C4;O76286	Tb10.61.1810		Mitochondrial carrier protein, putative	1.90214
Q57VR7	Tb927.7.710		Heat shock 70 kDa protein, putative	1.89069
D6XM23	Tb927.8.6390	APT-L	acyl-protein thioesterase-like	1.88844	Previous IDs: Tb08.11J15.160
P50885	Tb427.10.9880;Tb427tmp.02.1840	RPL18;TbL18LP	60S ribosomal protein L18, putative	1.88236	Previous IDs: TRYP_xi-1013a02.q1k_74;TRYPtp6k15-3d06.p1c_64;Tb427tmp.6k15.0410;current=false
Q57YE1	Tb427.08.900	TSR1	splicing factor TSR1	1.87953	Previous IDs: Tb427tmp.12O16.540;current=false
P30615;Q388I8	Tb427.10.14140	PYK1	Pyruvate kinase 1	1.86229
Q38AZ9	Tb927.10.6070	UMSBP1	universal minicircle sequence binding protein 1	1.84543	Previous IDs: TRYP_x-70a06.p2kb545_117;Tb10.70.0800
Q586H9;REV__Q386U3	Tb927.6.5070		Uncharacterized protein	1.83311
D7SGA2;Q57UU9;Q57UU8;Q57UU7;Q57UU6;Q57UU5	Tb927.2.340		Retrotransposon hot spot (RHS) protein, putative	1.8309
Q38B69	Tb10.70.1730		40S ribosomal protein S18, putative	1.81837
Q582N1	Tb427.03.5060		hypothetical protein, conserved	1.81819	Previous IDs: Tb427tmp.48K5.840;current=false
Q38FB8	Tb927.9.4210	ACS3	fatty acyl CoA synthetase 3	1.81686	Previous IDs: Tb09.160.2810;Tb09.160.2810:mRNA;Tb09.160.2810:pep;chr9contig160.tmp0231
Q388M7	Tb927.10.13720	RBP29	RNA-binding protein 29, putative	1.80653	Previous IDs: TRYP_x-61h03.q2kb185_478;Tb10.61.3200
Q38EN1	Tb927.9.7110		GRAM domain containing protein, putative	1.80398	Previous IDs: Tb09.160.5200;Tb09.160.5200:mRNA;Tb09.160.5200:pep;Tb927.9.7130;Tb927.9.7130:mRNA;Tb927.9.7130:pep;chr9contig160.tmp0406
Q584N8	Tb927.2.100	RHS1	retrotransposon hot spot protein 1 (RHS1), putative	1.79396
Q38DU2	Tb09.211.2150		Polyadenylate-binding protein	1.78552
D6XMU9;Q57VN6;Q57VN8	Tb927.8.1200		Calcium-transporting ATPase	1.78473
Q867U7;Q384T0	Tb11.02.5250	H2BV	Histone H2B variant	1.78193
Q38AK7	Tb927.10.7570	PDH-E2	dihydrolipoamide acetyltransferase E2 subunit, putative	1.77659	Previous IDs: TRYPtp6k15-3d06.p1c_444;Tb10.6k15.3080
Q585W3	Tb927.6.3650		ADP-ribosylation factor, putative	1.75329
Q57ZL6;O15727	Tb927.3.2960		Inosine-adenosine-guanosine-nucleoside hydrolase	1.74282
Q580T8	Tb427.03.5370		hypothetical protein, conserved	1.73454	Previous IDs: Tb427tmp.5L5.570;current=false
Q57W54	Tb927.5.1090		Threonyl-tRNA synthetase, putative	1.72155
Q383B2	Tb927.11.11680		2-oxoglutarate dehydrogenase E2 component, putative	1.71357	Previous IDs: Tb11.01.3550;Tb11.01.3550:mRNA;Tb11.01.3550:pep
Q383K3	Tb927.11.10760	KIN-D	kinesin-D	1.71329	Previous IDs: Tb11.01.2530;Tb11.01.2530:mRNA;Tb11.01.2530:pep
Q386W9	Tb927.11.1900		T-complex protein 1, beta subunit, putative	1.71309	Previous IDs: Tb11.42.0003;Tb11.42.0003:mRNA;Tb11.42.0003:pep
Q584N3;Q584M9	Tb927.2.280		Retrotransposon hot spot (RHS) protein, putative	1.70166
Q386L6	Tb927.11.2950	NUP89	Nucleoporin NUP89	1.69717	Previous IDs: Tb11.02.0460;Tb11.02.0460:mRNA;Tb11.02.0460:pep
Q57XK6	Tb927.3.3560		U-box domain containing protein, putative	1.69605	Previous IDs: Tb03.25B21.20
Q4GZ63	Tb427.01.1560		N-ethylmaleimide sensitive factor (NsF)	1.69335
Q388M8	Tb927.10.13710		Activator of Hsp90 ATPase, N-terminal/Activator of Hsp90 ATPase homolog 1-like protein, putative	1.69316	Previous IDs: TRYP_x-61h03.q2kb185_481;Tb10.61.3210
Q57YQ5;Q580Q1	Tb927.8.6980		Uncharacterized protein	1.68708
Q580K6	Tb927.11.6140;Tb927.3.4360		40S ribosomal protein S15A, putative	1.63075	Previous IDs: Tb03.26J7.620;Tb11.02.4000;Tb11.02.4000:mRNA;Tb11.02.4000:pep;Tb11.212.0060
Q580A3	Tb427.04.750		50S ribosomal protein L7Ae, putative	1.61384	Previous IDs: Tb427tmp.5E12.940;current=false
Q38CY6;Q38C82	Tb09.244.2725		Ribosomal protein L36, putative	1.60868
Q38BV4	Tb10.70.4700		Splicing factor PTSR1 interacting protein	1.59269
Q386W0	Tb927.11.1990		arginyl-tRNA synthetase, putative	1.58993	Previous IDs: Tb11.46.0008;Tb11.46.0008:mRNA;Tb11.46.0008:pep
Q384Y3;Q9BHJ6	Tb11.02.4700		14-3-3-like protein, putative	1.58616
Q38B98;Q57WI3	Tb10.70.2170		Ubiquitin/ribosomal protein S27a, putative	1.57734
Q38E40	Tb09.211.1150		Uncharacterized protein	1.57646
Q57U48	Tb927.8.7970		Uncharacterized protein	1.57165
Q586B8;P31543	Tb927.2.5980		ATP-dependent Clp protease subunit, heat shock protein 100 (HSP100), putative	1.57036
Q38D21	Tb09.211.4890		Casein kinase II, putative	1.56639
Q38E01	Tb927.9.10010	J34	chaperone protein DnaJ, putative	1.56251	Previous IDs: Tb09.211.1550;Tb09.211.1550:mRNA;Tb09.211.1550:pep;chr9contig211.tmp0183c
Q383V8	Tb927.10.13500;Tb927.11.9710	RPL10A	60S ribosomal protein L10a;60S ribosomal protein L10a, putative	1.56131	Previous IDs: Tb10.05.0220;Tb11.01.1470;Tb11.01.1470:mRNA;Tb11.01.1470:pep
Q57X62	Tb427.07.4460		hypothetical protein, conserved	1.55933	Previous IDs: Tb427tmp.26A24.970;current=false
Q581A7	Tb927.8.3870	NOP127	Nucleolar protein 127	1.54963	Previous IDs: Tb08.10J17.380
Q386I3	Tb927.11.3280	KIN13-5	Kinesin-13 5, putative	1.54046	Previous IDs: Tb11.02.0790;Tb11.02.0790:mRNA;Tb11.02.0790:pep
Q586V2;P13735	Tb927.2.4210		Glycosomal phosphoenolpyruvate carboxykinase	1.5387
Q586I4;P51408	Tb927.6.5120		60S acidic ribosomal protein P2, putative	1.53709
Q585W1	Tb927.6.3630		Sphingosine phosphate lyase-like protein, putative	1.5324
Q57WJ7;Q57XZ9	Tb927.8.8330		Calpain, putative	1.53121
Q386N5	Tb927.11.2750	POMP12	Present in the outer mitochondrial membrane proteome 12	1.52365	Previous IDs: Tb11.02.0350;Tb11.02.0350:mRNA;Tb11.02.0350:pep
Q6Q832;Q582Q6		caa	Aminopeptidase	1.51212
Q38A80	Tb927.10.8940	KH1	flagellum targeting protein kharon1, putative	1.50483	Previous IDs: TRYPtp6k15-3d06.p1c_221;Tb10.6k15.1500
Q57XS3	Tb927.7.7030		Uncharacterized protein	1.4996
Q57XN7	Tb427.07.2340;Tb427.07.2370		40S ribosomal protein S15, putative	1.49793	Previous IDs: Tb427tmp.22O10.320;Tb427tmp.22O10.360;current=false
Q57ZC7	Tb427.03.1840		3-oxo-5-alpha-steroid 4-dehydrogenase, putative	1.49412	Previous IDs: Tb427tmp.30P12.550;current=false
Q38EA2	Tb927.9.8740	DRBD3	Double RNA binding domain protein 3	1.49058	Previous IDs: Tb09.211.0560;Tb09.211.0560:mRNA;Tb09.211.0560:pep;chr9contig211.tmp0070c
Q586R0;Q586R1	Tb927.2.4590		Branched-chain amino acid aminotransferase, putative	1.48072
Q587C5	Tb927.6.4590		Glutamyl-tRNA synthetase, putative	1.48054
Q38AQ4;Q26710	Tb10.6k15.3640		Alternative oxidase	1.47401
Q38CZ5	Tb927.9.15050	DRC4	nexin-dynein regulatory complex 4	1.47011	Previous IDs: Tb09.244.2800;Tb09.244.2800:mRNA;Tb09.244.2800:pep;chr9contig244a01.tmp0280
Q57Z71	Tb427.05.3220		signal peptidase type I, putative	1.46865	Previous IDs: Tb427tmp.27M3.270;current=false
Q57VB1	Tb927.5.1520	HslU1	ATP-dependent protease ATPase subunit HslU1	1.4575	Previous IDs: Tb05.30H13.690
Q9GPE9;Q57XX1	Tb427.03.1380		ATP synthase subunit beta, mitochondrial	1.43436
Q389P7	Tb927.10.10830	RESC13	RNA-editing substrate binding complex protein RESC13	1.41522	Previous IDs: Tb10.406.0050
Q583I6	Tb427.04.2070		antigenic protein, putative	1.40505	Previous IDs: Tb427tmp.29M18.750;current=false
Q38AX1	Tb11.v5.0271;Tb927.10.6350	trypanin	trypanin;trypanin, putative	1.40431	Previous IDs: TRYP_x-70a06.p2kb545_70;Tb10.70.0480;embl.60
Q57VV0	Tb927.7.1040		40S ribosomal protein S16, putative	1.40357
Q583I7	Tb927.4.2060	FAZ8	Flagellum attachment zone protein 8	1.39617	Previous IDs: Tb04.29M18.730
Q4FKP3	Tb10.v4.0045;Tb927.10.4310	PHB2	chrX additional, unordered contigs, prohibitin, putative;prohibitin 2, putative	1.39383	Previous IDs: TRYP_x-70a06.p2kb545_389;Tb10.70.2920
Q57VP3;P17959	Tb10.70.1380		40S ribosomal protein S9, putative	1.39361
Q57ZQ7;D6XGC6	Tb927.5.1880		Ecotin-like protein 2	1.39051
M1E1E8			Ribosomal protein s29, putative	1.38919
Q9N9D0;Q38DN1	Tb927.9.11580	gim5A	Gim5A protein, glycosomal membrane protein	1.36486	Previous IDs: Tb09.211.2730;Tb09.211.2730:mRNA;Tb09.211.2730:pep;chr9contig211.tmp0312
Q387T9	Tb927.10.15750	p197	Tripartite attachment complex protein 197	1.36301	Previous IDs: TRYP_x-61h03.q2kb185_88;TRYP_x-61h03.q2kb185_89;Tb10.61.0550;Tb10.61.0560
Q57W35;Q57W36	Tb927.5.900		Oligosaccharyl transferase subunit, putative	1.35947
Q586C9	Tb927.2.5800		Sedoheptulose-1,7-bisphosphatase	1.35437
Q38CD0;Q587D5	Tb10.70.7010		60S ribosomal protein L9, putative	1.34578
Q38CA0;Q07010;Q38C93	Tb10.70.6650		Hypoxanthine phosphoribosyltransferase	1.33659
Q38BI2	Tb927.10.4180		TFIIF-stimulated CTD phosphatase, putative	1.33562	Previous IDs: TRYP_x-70a06.p2kb545_408;Tb10.70.3070
Q4GYC9	Tb927.1.4490	NAT2	N-acetyltransferase 2, putative	1.31416
Q57VX7	Tb927.5.360		75 kDa invariant surface glycoprotein	1.3095
Q581X9	Tb927.8.2030	PAVE1	Posterior and Ventral Edge protein 1		Previous IDs: Tb08.26N11.500

## Sheet: SuppFile1i_WTNoYFPv70R-TALE
UniProt ID	TriTryp ID	NAME	DESCRIPTION	-Log Student's T-test p-value WT_70R-TALE	Previous ID(s)
Q57ZN9	Tb927.5.1700	RPA2	replication Factor A 28 kDa subunit, putative	5.09978	Previous IDs: Tb05.1P6.900
Q388G3	Tb927.10.14390	POB3	FACT complex subunit POB3	4.61585	Previous IDs: TRYP_x-61h03.q2kb185_364;Tb10.61.2370
Q384B5	Tb927.11.9130	RPA1	Replication factor A protein 1	4.59087	Previous IDs: Tb11.01.0870;Tb11.01.0870:mRNA;Tb11.01.0870:pep
Q38F38	Tb927.9.5150	SNU13	13 kDa ribonucleoprotein-associated protein, putative	4.56897	Previous IDs: Tb09.160.3670;Tb09.160.3670:mRNA;Tb09.160.3670:pep;chr9contig160.tmp0286
Q383E9;P20030	Tb11.01.3080		Heat shock protein 70, putative	4.56684
Q38DK0	Tb927.9.11940	RPA3	replication factor A protein 3, putative	4.1351	Previous IDs: Tb09.211.3050;Tb09.211.3050:mRNA;Tb09.211.3050:pep;chr9contig211.tmp0346
Q384Y7	Tb927.11.6830		Domain of unknown function(DUF2779), putative	3.98777	Previous IDs: Tb11.02.4660;Tb11.02.4660:mRNA;Tb11.02.4660:pep
Q388E8	Tb10.61.2130	HEL67	ATP-dependent RNA helicase HEL67	3.96153
Q57Z31	Tb927.5.4170	H4	Histone H4	3.78596
Q38AL4	Tb927.10.7500	NOP1	fibrillarin	3.78177	Previous IDs: TRYPtp6k15-3d06.p1c_454;Tb10.6k15.3160;embl.30
Q585L0	Tb927.4.3400		hypothetical protein, conserved	3.77057	Previous IDs: Tb04.26G5.100
Q38B98;Q57WI3	Tb10.70.2170		Ubiquitin/ribosomal protein S27a, putative	3.58951
Q57YF6	Tb927.8.750	NOPP44/46-2	nucleolar RNA-binding protein, putative	3.53391	Previous IDs: Tb08.12O16.320
Q4GYX7	TB927.1.2430	H3	Histone H3, putative	3.53001
P17843;D7SG81	Tb927.11.3230;Tb927.2.6090	RPL44	60S ribosomal protein L44	3.47207	Previous IDs: 36E18.45;Tb11.02.0740;Tb11.02.0740:mRNA;Tb11.02.0740:pep
Q580R3	Tb427.03.5620		hypothetical protein, conserved	3.43935	Previous IDs: Tb427tmp.5L5.860;current=false
Q389T1;Q389S5;Q389S0	Tb927.10.10460;Tb927.10.10470;Tb927.10.10480;Tb927.10.10490;Tb927.10.10500;Tb927.10.10510;Tb927.10.10515;Tb927.10.10520;Tb927.10.10530;Tb927.10.10540;Tb927.10.10550;Tb927.10.10560;Tb927.10.10570;Tb927.10.10580;Tb927.10.10590		histone H2B, putative;unspecified product	3.38343	Previous IDs: Tb10.406.0330;Tb10.406.0340;Tb10.406.0350;Tb10.406.0360;Tb10.406.0370;Tb10.406.0380;Tb10.406.0390;Tb10.406.0400;Tb10.406.0410;Tb10.406.0420;Tb10.406.0430;Tb10.406.0440;Tb10.406.0450;Tb10.406.0460
Q57YA3	Tb427.07.2820;Tb427.07.2830;Tb427.07.2840;Tb427.07.2850;Tb427.07.2860;Tb427.07.2870;Tb427.07.2880;Tb427.07.2890;Tb427.07.2900;Tb427.07.2910;Tb427.07.2920;Tb427.07.2930;Tb427.07.2940		histone H2A, putative	3.33818	Previous IDs: Tb427tmp.13M20.510;Tb427tmp.13M20.520;Tb427tmp.13M20.530;Tb427tmp.13M20.540;Tb427tmp.13M20.550;Tb427tmp.13M20.560;Tb427tmp.13M20.570;Tb427tmp.13M20.580;Tb427tmp.13M20.590;Tb427tmp.13M20.600;Tb427tmp.13M20.610;Tb427tmp.13M20.620;Tb427tmp.13M20.630;current=false
Q386P3	Tb927.11.2670	NUP59	Nucleoporin NUP59	3.31235	Previous IDs: Tb11.02.0270;Tb11.02.0270:mRNA;Tb11.02.0270:pep
Q867U7;Q384T0	Tb927.11.7350	H2BV	Histone H2B variant	3.22238
Q582M3	Tb427.07.6360	h2aZ	histone H2A variant	3.21877	Previous IDs: Tb427tmp.33N13.260;current=false
Q867G5;Q387X7	Tb10.61.1090	H3V	Histone H3 variant	3.17532
Q585Y5	Tb927.6.3870		RNA-binding protein RBP14, putative	3.12425
Q38F23	Tb09.160.3820		Nucleolar RNA binding protein, putative	3.04312
Q383R3	Tb927.11.10160		60S ribosomal protein L22, putative	2.87947	Previous IDs: Tb11.01.1920;Tb11.01.1920:mRNA;Tb11.01.1920:pep
Q57U36	Tb927.7.180		Uncharacterized protein	2.86645
Q580Z5	Tb927.8.3750	NOP56	nucleolar protein 56	2.85062	Previous IDs: Tb08.10J17.600
Q57YE1	Tb427.08.900	TSR1	splicing factor TSR1	2.84051	Previous IDs: Tb427tmp.12O16.540;current=false
Q38EU7	Tb927.9.6320		hypothetical protein, conserved	2.83075	Previous IDs: Tb09.160.4610;Tb09.160.4610:mRNA;Tb09.160.4610:pep;Tb927.9.6340;Tb927.9.6340:mRNA;Tb927.9.6340:pep;chr9contig160.tmp0347
Q38FD9;Q38FE4	Tb927.9.3990		ribosomal protein S7, putative	2.81309	Previous IDs: Tb09.160.2550;Tb09.160.2550:mRNA;Tb09.160.2550:pep;chr9contig160.tmp0216
Q381J6	Tb927.11.15880;Tb927.11.15900		60S ribosomal protein L27, putative	2.74846	Previous IDs: Tb11.01.7535;Tb11.01.7545;Tb11.01.7535:mRNA;Tb11.01.7535:pep;Tb11.01.7545:mRNA;Tb11.01.7545:pep
Q384B1;A4URT2	Tb11.01.0910		DNA topoisomerase	2.71922
Q382D5;Q382D7	Tb11.01.5590	NRBD2	nuclear RNA binding domain 2	2.66441
Q581U8	Tb427.04.1330		DNA topoisomerase IB, large subunit	2.63549	Previous IDs: Tb427tmp.2L9.490;current=false
Q580T8	Tb427.03.5370		hypothetical protein, conserved	2.62969	Previous IDs: Tb427tmp.5L5.570;current=false
Q38BR9	Tb927.10.3280		60S ribosomal proteins L38, putative	2.51994	Previous IDs: 233.t00829;Tb10.70.4155
Q581X8	Tb927.8.2040		Domain of unknown function (DUF1767), putative	2.47987	Previous IDs: Tb08.26N11.520
Q57V53	Tb927.3.3330	HSP20	heat shock protein 20, putative	2.39101	Previous IDs: Tb03.3K10.400
Q386I7	Tb927.11.3240	TCP-1-zeta	T-complex protein 1, zeta subunit, putative	2.34661	Previous IDs: Tb11.02.0750;Tb11.02.0750:mRNA;Tb11.02.0750:pep
Q57Z72	Tb927.5.3210	SUMO	small ubiquitin-related modifier	2.32337	Previous IDs: Tb05.27M3.260
Q57WB1	Tb427.03.3750	PFC7	paraflagellar rod component, putative	2.30821	Previous IDs: Tb427tmp.28C22.770;current=false
Q584Q1	Tb427.06.2550	TRRM2	RNA-binding protein, putative	2.30078	Previous IDs: Tb427tmp.4M18.1180;current=false
Q6Q833		lap	Cytosolic leucyl aminopeptidase	2.29594
Q384J9	Tb927.11.8200		ribosomal protein S26, putative	2.27695	Previous IDs: 237.t00945;Tb11.01.0355;Tb11.01.0355:mRNA;Tb11.01.0355:pep
Q57WZ3	Tb427.03.1120	rtb2	GTP-binding nuclear protein rtb2, putative	2.23699	Previous IDs: Tb427tmp.27F10.90;current=false
Q38DT1	Tb09.211.2260		Protein kinase, putative	2.22184
Q386A6	Tb11.02.1566		Variant surface glycoprotein (VSG)-related, putative	2.11724
Q57V37;Q57V35	Tb927.7.1730		60S ribosomal protein L7, putative	2.04693
Q57US8	Tb427.04.470		snoRNP protein GAR1, putative	2.01994	Previous IDs: Tb427tmp.5D20.620;current=false
Q38CD0;Q587D5	Tb10.70.7010		60S ribosomal protein L9, putative	1.98367
Q382Z8	Tb927.11.11820;Tb927.11.11830		40S ribosomal protein S17, putative	1.95232	Previous IDs: 237.t00946;237.t00947;Tb11.01.3675;Tb11.01.3675:mRNA;Tb11.01.3675:pep;Tb11.01.3676;Tb11.01.3676:mRNA;Tb11.01.3676:pep
Q38EX6	Tb927.9.5900	GDH	glutamate dehydrogenase	1.927	Previous IDs: Tb09.160.4310;Tb09.160.4310:mRNA;Tb09.160.4310:pep;chr9contig160.tmp0326
Q38EA4	Tb927.9.8720	FBPase	fructose-1,6-bisphosphatase	1.71043	Previous IDs: Tb09.211.0540;Tb09.211.0540:mRNA;Tb09.211.0540:pep;chr9contig211.tmp0067c
Q583K7	Tb427.04.1860		ribosomal protein S19, putative	1.70153	Previous IDs: Tb427tmp.29M18.160;current=false
Q585X3	Tb927.6.3740		Heat shock 70 kDa protein, mitochondrial, putative	1.65278
Q4GYQ5	TB927.1.3180		40S ribosomal protein S11, putative	1.64419
Q57XD5	Tb927.8.2540	SCP2	3-ketoacyl-CoA thiolase	1.61852	Previous IDs: Tb08.26A17.500
Q385E9	Tb927.11.6180;Tb927.11.6200		60S ribosomal protein L28, putative	1.579	Previous IDs: Tb11.02.4050;Tb11.02.4070;Tb11.02.4050:mRNA;Tb11.02.4050:pep;Tb11.02.4070:mRNA;Tb11.02.4070:pep
Q57ZI7	Tb427.07.5000;Tb427.07.5020		60S ribosomal protein L19, putative	1.57783	Previous IDs: Tb427tmp.27E10.170;Tb427tmp.27E10.210;current=false
Q583K4	Tb927.4.1890		hypothetical protein, conserved	1.55889	Previous IDs: Tb04.29M18.310
Q57YZ8	Tb427.08.3150	TCP-1-gamma	T-complex protein 1, gamma subunit, putative	1.47764	Previous IDs: Tb427tmp.28L1.90;current=false
Q38EC5	Tb927.9.8070;Tb927.9.8420	QM	QM-like protein, 60S ribosomal protein L10, putative	1.45321	Previous IDs: Tb09.211.0110;Tb09.211.0340;Tb09.211.0110:mRNA;Tb09.211.0110:pep;Tb09.211.0340:mRNA;Tb09.211.0340:pep;chr9contig211.tmp0011c;chr9contig211.tmp0042c
Q384D3	Tb927.11.8950	LRRP1	leucine rich repeat	1.44055	Previous IDs: Tb11.01.0680;Tb11.01.0680:mRNA;Tb11.01.0680:pep
Q580B5	Tb427.04.870		dynein heavy chain, putative	1.38629	Previous IDs: Tb427tmp.5E12.710;current=false
Q385T6	Tb927.10.14580;Tb927.11.4820		60S ribosomal protein L17, putative	1.362	Previous IDs: TRYP_x-61h03.q2kb185_314;Tb11.02.2430;Tb10.61.2090;Tb11.02.2430:mRNA;Tb11.02.2430:pep
P50098			Inosine-5-monophosphate dehydrogenase	1.35283
Q38BK6;Q38BK7	Tb10.70.3360		40S ribosomal protein S3a	1.35269

## Sheet: SuppFile1j_WTNoYFPvYFP-RPA2
UniProt ID	TriTryp ID	NAME	DESCRIPTION	-Log Student's T-test p-value WT_YFP-RPA2	Previous ID(s)
Q384B5	Tb927.11.9130	RPA1	Replication factor A protein 1	7.29085	Previous IDs: Tb11.01.0870;Tb11.01.0870:mRNA;Tb11.01.0870:pep
Q580R3	Tb427.03.5620		hypothetical protein, conserved	6.39049	Previous IDs: Tb427tmp.5L5.860;current=false
Q57ZY5	Tb927.4.570		Replication factor-A C terminal domain containing protein, putative	6.25885
Q57ZN9;Q580U6	Tb927.5.1700	RPA2	Replication Factor A 28 kDa subunit, putative	5.42904
Q587H6	Tb927.2.2670	H4V	histone H4 variant	5.36671
Q382S1	Tb927.11.12600		ATP-dependent DNA helicase, putative	5.29257	Previous IDs: Tb11.01.4440;Tb11.01.4440:mRNA;Tb11.01.4440:pep
Q38DK0	Tb927.9.11940	RPA3	replication factor A protein 3, putative	5.18724	Previous IDs: Tb09.211.3050;Tb09.211.3050:mRNA;Tb09.211.3050:pep;chr9contig211.tmp0346
Q383K0;Q383I8	Tb11.01.2560			4.65359
Q57Y00	Tb927.4.3960		hypothetical protein, conserved	4.56005	Previous IDs: Tb04.1D20.730
Q57W67	Tb927.8.3060		cytosolic leucyl aminopeptidase, putative, metallo-peptidase, Clan MF, Family M17	4.28911
Q384Y7	Tb927.11.6830		Domain of unknown function(DUF2779), putative	4.14093	Previous IDs: Tb11.02.4660;Tb11.02.4660:mRNA;Tb11.02.4660:pep
Q387T6	Tb927.10.15780		hypothetical protein, conserved	4.13998	Previous IDs: TRYP_x-61h03.q2kb185_82;Tb10.61.0520
Q57YG0	Tb427.08.700	TbPIF7	DNA repair and recombination helicase protein PIF1, putative	3.99434	Previous IDs: Tb427tmp.12O16.270;current=false
Q57Z72	Tb927.5.3210	SUMO	small ubiquitin-related modifier	3.9775	Previous IDs: Tb05.27M3.260
Q381W1	Tb927.11.14740		YqaJ-like viral recombinase domain containing protein, putative	3.94894	Previous IDs: Tb11.01.6370;Tb11.01.6370:mRNA;Tb11.01.6370:pep
Q8IFI8	Tb927.1.120	RHS4	retrotransposon hot spot protein 4 (RHS4), putative	3.82893
Q867G5;Q387X7	Tb10.61.1090	H3V	Histone H3 variant	3.78263
Q38B42;P07752	Tb10.70.1370		Fructose-bisphosphate aldolase	3.76103
Q71SQ4;Q38EX8	Tb09.160.4250		Tryparedoxin peroxidase	3.72471
Q57V68	Tb927.3.3180		Nucleoporin NUP98	3.7189
Q38BK6;Q38BK7	Tb10.70.3360		40S ribosomal protein S3a	3.70391
Q584Q1	Tb427.06.2550	TRRM2	RNA-binding protein, putative	3.63088	Previous IDs: Tb427tmp.4M18.1180;current=false
Q386P3	Tb927.11.2670	NUP59	Nucleoporin NUP59	3.54758	Previous IDs: Tb11.02.0270;Tb11.02.0270:mRNA;Tb11.02.0270:pep
Q57ZC8	Tb927.3.1830		RMI1 domain-containing protein	3.48021	Previous IDs: Tb03.30P12.520
Q383X7;A4URT1	Tb11.01.1280		DNA topoisomerase III	3.47112
Q382M3	Tb927.11.13130	MBAP1	membrane-bound acid phosphatase 1 precursor	3.44383	Previous IDs: Tb11.01.4701;Tb11.01.4701:mRNA;Tb11.01.4701:pep
Q586Q9;B7X5Y5	Tb927.2.4580	UNC119	UNC119	3.42985
Q583K7	Tb427.04.1860		ribosomal protein S19, putative	3.40525	Previous IDs: Tb427tmp.29M18.160;current=false
Q57U86	Tb927.5.3800		Glutamine hydrolysing (Not ammonia-dependent) carbomoyl phosphate synthase, putative	3.336
B5LEM7;B5LEL8;B5LEL6;G1CRN4;B5LEM6;B5LEM4;B3GVM6;B5LEM0;B5LEL9;B5LEL4;B3GVT0			ESAG5 type 16 (Fragment)	3.29739
Q38BH8	Tb927.10.4220		hypothetical protein, conserved	3.23861	Previous IDs: TRYP_x-70a06.p2kb545_403;Tb10.70.3030
Q582M3	Tb427.07.6360	h2aZ	histone H2A variant	3.1947	Previous IDs: Tb427tmp.33N13.260;current=false
Q38E19	Tb09.211.1360		hypothetical protein, conserved	3.16406
Q38A77;Q38A79	Tb10.6k15.1460	KAP4-2	kinetoplast-associated protein 4 isoform 2, HMG box-containing protein 2 isoform 2, mitochondrial	3.06706
Q38C24	Tb10.70.5550		hypothetical protein, conserved	3.04477
Q57YA3	Tb427.07.2820;Tb427.07.2830;Tb427.07.2840;Tb427.07.2850;Tb427.07.2860;Tb427.07.2870;Tb427.07.2880;Tb427.07.2890;Tb427.07.2900;Tb427.07.2910;Tb427.07.2920;Tb427.07.2930;Tb427.07.2940		histone H2A, putative	3.01086	Previous IDs: Tb427tmp.13M20.510;Tb427tmp.13M20.520;Tb427tmp.13M20.530;Tb427tmp.13M20.540;Tb427tmp.13M20.550;Tb427tmp.13M20.560;Tb427tmp.13M20.570;Tb427tmp.13M20.580;Tb427tmp.13M20.590;Tb427tmp.13M20.600;Tb427tmp.13M20.610;Tb427tmp.13M20.620;Tb427tmp.13M20.630;current=false
Q385P2	Tb927.11.5260		SWI/SNF-related matrix-associated actin-dependent regulator of chromatin subfamily A-like protein, putative	2.98374	Previous IDs: Tb11.02.2930;Tb11.02.2930:mRNA;Tb11.02.2930:pep;Tb11.212.1140
Q38EI9	Tb927.9.7590;Tb927.9.7620	L11	60S ribosomal protein L11, putative	2.96405	Previous IDs: Tb09.160.5580;Tb09.160.5590;Tb09.160.5580:mRNA;Tb09.160.5580:pep;Tb09.160.5590:mRNA;Tb09.160.5590:pep;chr9contig160.tmp0444c;chr9contig160.tmp0445c
Q38EA4	Tb927.9.8720	FBPase	fructose-1,6-bisphosphatase	2.94105	Previous IDs: Tb09.211.0540;Tb09.211.0540:mRNA;Tb09.211.0540:pep;chr9contig211.tmp0067c
Q57UW3	Tb927.8.4890		Endoplasmic reticulum oxidoreductin, putative	2.82873
Q4FKN7;Q4FKN8;Q389U1;Q389U9;P21787	Tb10.v4.0053		hypothetical protein, conserved	2.78308
Q38DU2	Tb09.211.2150		Polyadenylate-binding protein	2.74064
Q388G3	Tb927.10.14390	POB3	FACT complex subunit POB3	2.71663	Previous IDs: TRYP_x-61h03.q2kb185_364;Tb10.61.2370
P21899;Q383T7	Tb11.01.1680		Ubiquitin-60S ribosomal protein L40	2.67495
Q4GYX7	TB927.1.2430	H3	Histone H3, putative	2.65304
Q57YE9	Tb927.8.820		VID27 cytoplasmic protein, putative	2.57832	Previous IDs: Tb08.12O16.390
Q57Z31	Tb927.5.4170	H4	Histone H4	2.55062
Q38EA2	Tb927.9.8740	DRBD3	Double RNA binding domain protein 3	2.47855	Previous IDs: Tb09.211.0560;Tb09.211.0560:mRNA;Tb09.211.0560:pep;chr9contig211.tmp0070c
Q389D9	Tb927.10.12030		hypothetical protein, conserved	2.47743	Previous IDs: Tb10.389.1760
Q388W1	Tb927.10.12850	TRF	ttaggg binding factor	2.46342	Previous IDs: Tb10.389.0680
D6XKT6	Tb927.8.1990	mPRX	peroxidoxin	2.44523	Previous IDs: Tb08.26N11.460
Q581U8	Tb427.04.1330		DNA topoisomerase IB, large subunit	2.41809	Previous IDs: Tb427tmp.2L9.490;current=false
Q389T1;Q389S5;Q389S0	Tb10.406.0330		Histone H2B	2.34347
Q38FW8	Tb927.9.1810;Tb927.9.1850		60S ribosomal protein L35, putative	2.31564	Previous IDs: Tb09.160.0700;Tb09.160.0710;Tb09.160.0700:mRNA;Tb09.160.0700:pep;Tb09.160.0710:mRNA;Tb09.160.0710:pep;chr9contig160.tmp0070c;chr9contig160.tmp0071c
Q383E9;P20030	Tb11.01.3080		Heat shock protein 70, putative	2.26597
Q38AM9	Tb927.10.7330;Tb927.10.7340		40S ribosomal protein S24E, putative	2.25968	Previous IDs: TRYPtp6k15-3d06.p1c_475;TRYPtp6k15-3d06.p1c_476;Tb10.6k15.3340;Tb10.6k15.3350
Q583T1;Q383F5;P55842	Tb927.6.720		40S ribosomal protein L14, putative	2.24481
P30616		PYK2	Pyruvate kinase 2	2.16954
D7SGA2	Tb927.2.340	RHS4	retrotransposon hot spot protein 4 (RHS4), putative	2.16924
Q38DH8	Tb927.9.12200;Tb927.9.12240		60S ribosomal subunit protein L31, putative	1.96808	Previous IDs: Tb09.211.3270;Tb09.211.3280;Tb09.211.3270:mRNA;Tb09.211.3270:pep;Tb09.211.3280:mRNA;Tb09.211.3280:pep;chr9contig211.tmp0370;chr9contig211.tmp0371
Q867U7;Q384T0	Tb927.11.7350	H2BV	Histone H2B variant	1.88544
Q57ZI7	Tb427.07.5000;Tb427.07.5020		60S ribosomal protein L19, putative	1.86575	Previous IDs: Tb427tmp.27E10.170;Tb427tmp.27E10.210;current=false
P30615;Q388I8	Tb427.10.14140	PYK1	Pyruvate kinase 1	1.84591
Q382D5;Q382D7	Tb11.01.5590	NRBD2	nuclear RNA binding domain 2	1.73286
Q381S1	Tb927.11.15140	CAP62	Cytoskeleton-associated protein 62 kDa	1.71845	Previous IDs: Tb11.01.6790;Tb11.01.6790:mRNA;Tb11.01.6790:pep
Q382Z8	Tb927.11.11820;Tb927.11.11830		40S ribosomal protein S17, putative	1.71005	Previous IDs: 237.t00946;237.t00947;Tb11.01.3675;Tb11.01.3675:mRNA;Tb11.01.3675:pep;Tb11.01.3676;Tb11.01.3676:mRNA;Tb11.01.3676:pep
Q38CI4	Tb927.10.560		40S ribosomal proteins S11, putative	1.69231	Previous IDs: 233.t00830;Tb10.70.7695
Q57ZV5	Tb427.05.2790	Pol beta-PAK	mitochondrial DNA polymerase beta-PAK	1.53511	Previous IDs: Tb427tmp.26K5.490;current=false
Q57VM1	Tb427.08.1330;Tb427.08.1340		60S ribosomal protein L7a, putative	1.43432	Previous IDs: Tb427tmp.29O4.580;Tb427tmp.29O4.590;current=false
Q383V8	Tb927.10.13500;Tb927.11.9710	RPL10A	60S ribosomal protein L10a;60S ribosomal protein L10a, putative	1.41249	Previous IDs: Tb10.05.0220;Tb11.01.1470;Tb11.01.1470:mRNA;Tb11.01.1470:pep
Q57V37;Q57V35	Tb927.7.1730		60S ribosomal protein L7, putative	1.39363
Q57YX8	Tb427.08.3350		DNA polymerase theta (helicase domain only), putative	1.36639	Previous IDs: Tb427tmp.28L1.410;current=false
Q57YL6	Tb427.08.6150;Tb427.08.6160		40S ribosomal protein S8, putative	1.36418	Previous IDs: Tb427tmp.11J15.560;Tb427tmp.11J15.570;current=false
Q38B00	Tb11.v5.0199;Tb927.10.6060	UMSBP2	universal minicircle sequence binding protein 2;universal minicircle sequence binding protein, putative	1.34113	Previous IDs: TRYP_x-70a06.p2kb545_119;Tb10.70.0820
P50098			Inosine-5-monophosphate dehydrogenase	1.33957

[truncated: 7 more sheets: SuppFile1k_NonR-TALEv70R-TALE, SuppFile1l_WTNoYFPv177R-TALE, SuppFile1m_NonR-TALEv177R-TALE, SuppFile1n_WTNoYFPvYFP-KKT2, SuppFile1o_ingiR-TALEvTelR-TALE, SuppFile1p_ingiR-TALEv70R-TALE, SuppFile1q_ingiR-TALEv177R-TALE]
